# Supplementary material
Source: publisher figshare collection journal article supplement (https://acs.figshare.com/ndownloader/files/3868576)
Supplement: Supplementary file 1 [file 3868576]

38
Au38  ��binding energy extrapolated to T=0K���� -84.82448   eV (Gas) ; -84.84983  eV (in DCE solvent)
Au  3.7629  2.0801  1.4438
Au -3.0634 -2.1682  2.5578
Au -1.7462  1.8077 -3.7803
Au -1.1067 -2.9890 -2.1102
Au -0.3423  0.0392 -1.9848
Au -1.7243  3.4075  2.4421
Au  1.7462 -1.8076  3.7803
Au -0.3453 -3.0848  2.2445
Au  1.1068  2.9891  2.1102
Au  2.5990 -0.6763 -2.7114
Au  0.3808 -4.5188 -0.1627
Au  1.0342 -1.7065 -0.2084
Au  2.3731  3.8577 -0.3401
Au  0.3308 -1.6415 -4.2337
Au  0.3423 -0.0392  1.9848
Au -3.3798  0.7728 -1.6398
Au -3.7629 -2.0801 -1.4438
Au -2.4133 -0.9785 -3.7253
Au  2.4133  0.9785  3.7253
Au  1.7243 -3.4075 -2.4421
Au -1.6866 -1.0547  0.2730
Au -2.3730 -3.8577  0.3401
Au -0.3308  1.6415  4.2337
Au -2.5990  0.6763  2.7114
Au  1.0016  1.1511 -4.2894
Au -2.4351  3.5004 -1.5639
Au  1.6866  1.0547 -0.2730
Au  3.3798 -0.7728  1.6399
Au -4.4571 -0.3992  0.7788
Au  0.3453  3.0848 -2.2445
Au  4.4571  0.3992 -0.7788
Au  2.4351 -3.5004  1.5639
Au -3.7923  2.3967  0.7167
Au  3.0634  2.1682 -2.5578
Au -0.3808  4.5188  0.1626
Au -1.0016 -1.1511  4.2894
Au -1.0342  1.7065  0.2084
Au  3.7923 -2.3967 -0.7167
18
sub        -92.38429   eV ; -92.64545  eV  
C  6.0902 -6.3234  0.5017
C  5.6556 -7.2108  1.4809
C  6.4117 -7.4173  2.6428
C  7.2968 -5.6256  0.6731
C  8.0633 -5.8267  1.8298
C  7.6099 -6.7236  2.8057
O  7.6289 -4.7718 -0.3532
H  5.5143 -6.1515 -0.4084
H  4.7165 -7.7473  1.3357
H  6.0695 -8.1139  3.4086
H  9.0039 -5.3009  1.9860
H  8.2112 -6.8749  3.7040
C  8.8477 -4.0249 -0.1989
C  9.0085 -3.1302 -1.3332
C  9.1725 -2.3718 -2.2649
H  9.3049 -1.7060 -3.0935
H  9.7081 -4.7144 -0.1336
H  8.8135 -3.4394  0.7367
38
Au38(2-)    -88.72984 eV ; -92.58284 eV
Au  3.7629  2.0801  1.4438
Au -3.0634 -2.1682  2.5578
Au -1.7462  1.8077 -3.7803
Au -1.1067 -2.9890 -2.1102
Au -0.3423  0.0392 -1.9848
Au -1.7243  3.4075  2.4421
Au  1.7462 -1.8076  3.7803
Au -0.3453 -3.0848  2.2445
Au  1.1068  2.9891  2.1102
Au  2.5990 -0.6763 -2.7114
Au  0.3808 -4.5188 -0.1627
Au  1.0342 -1.7065 -0.2084
Au  2.3731  3.8577 -0.3401
Au  0.3308 -1.6415 -4.2337
Au  0.3423 -0.0392  1.9848
Au -3.3798  0.7728 -1.6398
Au -3.7629 -2.0801 -1.4438
Au -2.4133 -0.9785 -3.7253
Au  2.4133  0.9785  3.7253
Au  1.7243 -3.4075 -2.4421
Au -1.6866 -1.0547  0.2730
Au -2.3730 -3.8577  0.3401
Au -0.3308  1.6415  4.2337
Au -2.5990  0.6763  2.7114
Au  1.0016  1.1511 -4.2894
Au -2.4351  3.5004 -1.5639
Au  1.6866  1.0547 -0.2730
Au  3.3798 -0.7728  1.6399
Au -4.4571 -0.3992  0.7788
Au  0.3453  3.0848 -2.2445
Au  4.4571  0.3992 -0.7788
Au  2.4351 -3.5004  1.5639
Au -3.7923  2.3967  0.7167
Au  3.0634  2.1682 -2.5578
Au -0.3808  4.5188  0.1626
Au -1.0016 -1.1511  4.2894
Au -1.0342  1.7065  0.2084
Au  3.7923 -2.3967 -0.7167
56
IM1-B1  -178.43023 eV ; -178.66585 eV
Au 18.9549  2.2708  1.3000
Au 12.3734 -2.2030  2.6689
Au 13.0571  2.0709 -3.4265
Au 13.9400 -2.7863 -2.0784
Au 14.6616  0.3235 -1.8516
Au 13.5423  3.3517  2.7936
Au 17.2018 -1.7474  3.5669
Au 15.0414 -3.1163  2.2052
Au 16.4140  3.2213  2.3618
Au 17.6949 -0.3517 -3.0250
Au 15.6527 -4.3432 -0.3518
Au 16.1397 -1.5263 -0.3253
Au 17.3447  4.0239 -0.2298
Au 15.2059 -1.2717 -4.1651
Au 15.5526 -0.0537  1.9816
Au 11.5882  0.8493 -1.1923
Au 11.1565 -2.2510 -1.2849
Au 12.4863 -0.7545 -3.3407
Au 17.8001  1.0244  3.5558
Au 16.8127 -3.0603 -2.6375
Au 13.3351 -0.9382  0.3101
Au 12.9518 -3.7896  0.3901
Au 15.1413  1.5575  4.3240
Au 12.7225  0.6063  2.9789
Au 15.7725  1.5183 -4.1815
Au 12.5031  3.6253 -1.0861
Au 16.7719  1.2225 -0.2147
Au 18.8277 -0.6027  1.4483
Au 10.4833 -0.4352  1.4260
Au 15.2160  3.4341 -2.0779
Au 19.4883  0.7560 -1.0191
Au 17.7615 -3.2655  1.2365
Au 11.3489  2.3130  1.2200
Au 17.8866  2.4662 -2.5650
Au 14.6723  4.6003  0.5064
Au 14.4918 -1.2333  4.3331
Au 14.0727  1.8070  0.4608
Au 18.9240 -2.0180 -1.0433
C  6.2497 -2.3060  4.0460
C  5.3484 -2.2518  5.1185
C  4.5957 -1.1055  5.3704
C  6.4047 -1.1840  3.2178
C  5.6374 -0.0313  3.4588
C  4.7413  0.0019  4.5243
O  7.2737 -1.0952  2.1587
H  6.8162 -3.2206  3.8710
H  5.2479 -3.1269  5.7633
H  3.8998 -1.0773  6.2087
H  5.7689  0.8253  2.7949
H  4.1481  0.9021  4.6944
C  8.0349 -2.2654  1.8263
C  9.1360 -1.9202  0.8677
C  9.4072 -2.6001 -0.2482
H  8.7533 -3.3960 -0.6279
H  7.3658 -3.0332  1.3913
H  8.4970 -2.6814  2.7386
56
IM1-B2  -178.46423 eV ; -178.69147 eV
Au 18.8216  2.2768  1.4500
Au 12.2548 -2.1822  2.5854
Au 13.1070  2.2056 -3.5152
Au 13.9506 -2.6500 -2.1701
Au 14.5204  0.3132 -1.9616
Au 13.4121  3.3611  2.7983
Au 17.0467 -1.7505  3.6073
Au 14.9367 -3.1303  2.2022
Au 16.2701  3.1922  2.4132
Au 17.6682 -0.2262 -2.9032
Au 15.5857 -4.2375 -0.3682
Au 16.0989 -1.4428 -0.3346
Au 17.3143  4.0793 -0.1091
Au 15.2953 -1.1545 -4.2666
Au 15.4757  0.0017  1.9799
Au 11.6489  0.9315 -1.3516
Au 11.1154 -2.0436 -1.3127
Au 12.4582 -0.6460 -3.7823
Au 17.6278  1.0134  3.6716
Au 16.8029 -2.9505 -2.6556
Au 13.3326 -0.9561  0.2490
Au 12.8628 -3.7508  0.2886
Au 14.9422  1.5317  4.3464
Au 12.5185  0.6338  3.0620
Au 15.8315  1.6326 -4.0999
Au 12.5375  3.6867 -1.1465
Au 16.6806  1.2862 -0.2558
Au 18.7133 -0.5906  1.5577
Au 10.6829 -0.3813  1.0439
Au 15.2477  3.5398 -2.0438
Au 19.4398  0.7820 -0.8635
Au 17.6690 -3.2623  1.2879
Au 11.3207  2.3953  1.1431
Au 17.9451  2.6074 -2.4665
Au 14.6064  4.6414  0.5469
Au 14.3229 -1.2483  4.3019
Au 14.0177  1.8172  0.4293
Au 18.8697 -1.9976 -0.9618
C  8.6403 -6.7114 -1.7110
C  7.6768 -7.7025 -1.5434
C  6.3959 -7.5527 -2.0939
C  8.3356 -5.5451 -2.4337
C  7.0587 -5.3887 -2.9933
C  6.0985 -6.3955 -2.8159
O  9.3532 -4.6312 -2.5300
H  9.6414 -6.8156 -1.2927
H  7.9264 -8.6011 -0.9769
H  5.6420 -8.3310 -1.9633
H  6.7992 -4.5000 -3.5669
H  5.1070 -6.2633 -3.2563
C  9.0903 -3.4192 -3.2578
C 10.2813 -2.5140 -3.1709
C 10.8740 -1.9056 -4.1994
H 10.5828 -2.0543 -5.2471
H  8.2072 -2.9163 -2.8233
H  8.8738 -3.6645 -4.3153
56
IM1-B3  -178.44340 eV ; -178.65254 eV
Au 18.2447  2.9490  1.8081
Au 11.3565 -0.9250  2.6895
Au 12.4277  3.2316 -3.1301
Au 12.8636 -1.8200 -1.9039
Au 14.0023  1.5852 -1.4789
Au 12.8949  4.4482  3.1572
Au 16.0895 -1.0049  3.8794
Au 13.8834 -2.2973  2.4960
Au 15.7599  4.0967  2.8283
Au 16.8521  0.5468 -2.6390
Au 14.4573 -3.3428 -0.0822
Au 15.2495 -0.5366 -0.0439
Au 16.8288  4.8960  0.2838
Au 14.1869 -0.0759 -3.7145
Au 14.5453  0.7736  2.2875
Au 10.0565  2.6919 -1.2386
Au  9.8871 -0.9914 -0.8032
Au 11.5578  0.6003 -2.5547
Au 16.8742  1.7047  3.9317
Au 15.7167 -2.0768 -2.3576
Au 12.4656  0.0929  0.2963
Au 11.7306 -2.6757  0.5070
Au 14.2495  2.4102  4.6181
Au 11.7592  1.8175  3.3247
Au 15.1593  2.6072 -3.8362
Au 11.9786  4.7181 -0.7919
Au 16.0014  2.1667  0.3481
Au 17.8810  0.0738  1.8426
Au  9.9984  1.0942  1.2277
Au 14.6856  4.5248 -1.7008
Au 18.6909  1.4109 -0.5605
Au 16.5917 -2.5023  1.5397
Au 10.5948  3.8428  1.4685
Au 17.2536  3.3027 -2.0329
Au 14.1637  5.5457  0.8856
Au 13.3696 -0.3283  4.5846
Au 13.1940  2.7840  0.8787
Au 17.9136 -1.3145 -0.6801
C  4.1691  0.8011 -3.7363
C  2.8701  0.4862 -4.1224
C  2.2984 -0.7438 -3.7701
C  4.9262 -0.1193 -2.9901
C  4.3660 -1.3544 -2.6356
C  3.0551 -1.6547 -3.0308
O  6.1912  0.2994 -2.6690
H  4.6242  1.7565 -4.0017
H  2.2955  1.2106 -4.7027
H  1.2800 -0.9889 -4.0756
H  4.9311 -2.0834 -2.0550
H  2.6234 -2.6165 -2.7461
C  7.0632 -0.5838 -1.9421
C  8.3320  0.1502 -1.5836
C  8.4739  1.4746 -1.7509
H  7.6570  2.0527 -2.2012
H  7.2840 -1.4771 -2.5524
H  6.5757 -0.9214 -1.0103
56
IM1-B4  -178.43846 eV ; -178.64638 eV
Au 18.8321  2.5392  1.6778
Au 12.3852 -2.1552  2.3241
Au 13.2810  2.0909 -3.3498
Au 14.2287 -3.3774 -2.7736
Au 15.0034  0.5082 -1.8188
Au 13.3060  3.3282  2.8045
Au 17.0243 -1.5827  3.6658
Au 15.0808 -3.0467  2.1089
Au 16.1924  3.3350  2.5495
Au 17.8611 -0.0187 -2.7630
Au 15.9290 -4.2473 -0.4653
Au 16.1765 -1.4168 -0.2024
Au 17.2630  4.2835  0.0608
Au 15.4754 -1.0019 -4.1605
Au 15.3674  0.0556  2.0493
Au 11.5392  0.9694 -1.3765
Au 11.1083 -2.2055 -1.2719
Au 12.8690 -0.8285 -3.0923
Au 17.5485  1.1735  3.7885
Au 16.9877 -2.7511 -2.5763
Au 13.4059 -0.8413  0.0196
Au 13.2399 -3.6477  0.0332
Au 14.8191  1.5597  4.3925
Au 12.3728  0.6223  3.0930
Au 16.0345  1.8427 -4.0761
Au 12.5318  3.6823 -1.1182
Au 16.8238  1.4051  0.0761
Au 18.8518 -0.3727  1.7716
Au 10.6974 -0.4303  0.8930
Au 15.2754  3.7482 -1.9987
Au 19.5714  1.0364 -0.6223
Au 17.8463 -3.0745  1.3914
Au 11.2686  2.3605  1.1196
Au 17.9603  2.7871 -2.1995
Au 14.5370  4.7079  0.6389
Au 14.2286 -1.2604  4.2705
Au 14.0630  1.9092  0.4626
Au 18.9986 -1.7071 -0.7916
C 10.2148 -8.1154 -4.8293
C 10.1918 -9.3338 -5.5039
C 11.2599 -9.7134 -6.3277
C 11.3136 -7.2535 -4.9758
C 12.3800 -7.6172 -5.8115
C 12.3451 -8.8488 -6.4773
O 11.2511 -6.0815 -4.2600
H  9.3967 -7.8085 -4.1760
H  9.3370 -10.0002 -5.3743
H 11.2447 -10.6747 -6.8436
H 13.2324 -6.9554 -5.9579
H 13.1852 -9.1280 -7.1170
C 12.4626 -5.3096 -4.1853
C 12.3434 -4.1984 -3.1813
C 11.2167 -3.7840 -2.5902
H 10.2606 -4.2852 -2.7856
H 12.6925 -4.8701 -5.1728
H 13.3005 -5.9727 -3.9122
56
IM1-T2     -177.41379 eV;  
C 12.8783 -9.7883 -2.3179
C 12.8546 -10.8290 -1.3925
C 13.1409 -10.5870 -0.0420
C 13.1912 -8.4865 -1.8973
C 13.4872 -8.2337 -0.5498
C 13.4585 -9.2926  0.3677
O 13.1720 -7.5336 -2.8926
H 12.6504 -9.9540 -3.3724
H 12.6055 -11.8371 -1.7293
H 13.1212 -11.4051  0.6777
H 13.7427 -7.2347 -0.1980
H 13.6915 -9.0915  1.4144
C 13.3468 -6.1761 -2.4703
C 13.1555 -5.2846 -3.6034
C 12.9958 -4.4997 -4.5169
H 12.8466 -3.8290 -5.3408
H 14.3593 -6.0228 -2.0460
H 12.6213 -5.9243 -1.6738
Au 18.8441  2.4301  1.5756
Au 12.2635 -2.0461  2.7083
Au 13.1424  2.3149 -3.3581
Au 13.9816 -2.4793 -2.0244
Au 14.6665  0.4742 -1.7845
Au 13.4868  3.5558  2.8683
Au 17.0227 -1.6777  3.7231
Au 14.9151 -3.2576  2.4717
Au 16.3987  3.5722  2.6693
Au 17.8533 -0.1611 -2.9867
Au 15.5637 -4.1329 -0.2273
Au 16.1473 -1.3311 -0.2020
Au 17.3592  4.2253  0.0104
Au 15.3138 -1.0209 -4.1279
Au 15.5589  0.1878  2.1021
Au 11.2762  1.2261 -1.4145
Au 11.3470 -1.6707 -1.2136
Au 12.5235 -0.4256 -3.4578
Au 17.6436  1.1782  3.7907
Au 16.7927 -2.8274 -2.5371
Au 13.4637 -0.7538  0.4545
Au 12.8909 -3.5559  0.4232
Au 14.9696  1.7476  4.4255
Au 12.6830  0.7923  2.9655
Au 15.9176  1.7300 -4.0350
Au 12.5216  3.8291 -1.0714
Au 16.7575  1.4330 -0.1263
Au 18.4881 -0.4312  1.5673
Au 10.7298 -0.1684  1.0797
Au 15.2845  3.4802 -1.8329
Au 19.4745  0.8648 -0.8045
Au 17.6242 -3.1692  1.4210
Au 11.3443  2.5831  1.1516
Au 18.0001  2.6745 -2.3841
Au 14.6764  4.7955  0.6485
Au 14.3508 -1.1057  4.3416
Au 14.0714  2.0091  0.5194
Au 18.8712 -1.8916 -0.8846
56
TS1/B1	-177.22580 eV; -177.46061 eV
Au 18.9839  2.2182  1.4536
Au 12.3054 -2.3050  2.5286
Au 13.3284  2.2449 -3.6343
Au 14.0237 -2.5606 -2.2433
Au 14.7745  0.3966 -2.0088
Au 13.4552  3.2492  2.6297
Au 17.0540 -1.8221  3.5639
Au 14.9491 -3.2515  2.1846
Au 16.3761  3.2265  2.4189
Au 17.8947 -0.3015 -3.0715
Au 15.5948 -4.2589 -0.4565
Au 16.1116 -1.4852 -0.3632
Au 17.4797  4.0057 -0.1194
Au 15.4007 -1.1031 -4.3336
Au 15.5147 -0.0305  1.9380
Au 11.6327  0.9756 -1.6516
Au 11.2451 -1.8816 -1.7943
Au 12.6504 -0.5714 -3.7779
Au 17.6640  0.9610  3.5876
Au 16.8551 -2.9496 -2.7228
Au 13.3479 -0.8464  0.1453
Au 12.9105 -3.6400  0.1490
Au 14.9918  1.5275  4.2971
Au 12.6131  0.5073  2.8181
Au 16.0603  1.6615 -4.2305
Au 12.6518  3.6411 -1.1937
Au 16.8686  1.2107 -0.2271
Au 18.7148 -0.6315  1.4918
Au 10.5905 -0.8095  0.8555
Au 15.4158  3.4876 -2.0754
Au 19.6022  0.7500 -0.9107
Au 17.6682 -3.2945  1.2250
Au 11.3882  2.0788  0.9004
Au 18.0750  2.5021 -2.4700
Au 14.7827  4.6364  0.4955
Au 14.3494 -1.2754  4.2261
Au 14.1865  1.8367  0.3194
Au 18.8998 -2.0096 -1.0111
C  6.0486 -5.7764  1.1528
C  5.4532 -6.4746  2.2069
C  5.5864 -6.0250  3.5240
C  6.7763 -4.6109  1.4195
C  6.8923 -4.1411  2.7356
C  6.2992 -4.8512  3.7827
O  7.3299 -3.9313  0.3370
H  5.9647 -6.1189  0.1200
H  4.9059 -7.3932  2.0004
H  5.1397 -6.5830  4.3453
H  7.4190 -3.2095  2.9427
H  6.3933 -4.4772  4.8017
C  8.7359 -3.6347  0.4994
C  9.1935 -2.6535 -0.5180
C  9.1783 -2.3432 -1.7617
H  8.6042 -2.3939 -2.6833
H  9.3040 -4.5693  0.3356
H  8.9481 -3.2918  1.5179
56
TS1/B2	-177.30578 eV; -177.60009 eV
Au 19.0308  2.2449  1.3391
Au 12.2931 -2.0349  2.6941
Au 13.1280  2.2662 -3.5188
Au 13.9140 -2.6278 -2.1399
Au 14.6461  0.3963 -1.9264
Au 13.6444  3.4786  2.7908
Au 17.1169 -1.7399  3.5903
Au 14.9404 -3.0894  2.2548
Au 16.4781  3.1837  2.3166
Au 17.6015 -0.3119 -2.9512
Au 15.5027 -4.2387 -0.3263
Au 16.1339 -1.4578 -0.3171
Au 17.4971  4.0204 -0.2381
Au 15.1921 -1.1890 -4.2665
Au 15.5517  0.0263  1.9898
Au 11.6920  1.0823 -1.3086
Au 11.2568 -1.8256 -1.2665
Au 12.4854 -0.5300 -3.5920
Au 17.8266  1.0129  3.5952
Au 16.7138 -3.0201 -2.6577
Au 13.4078 -0.8333  0.2876
Au 12.8162 -3.5977  0.3691
Au 15.1521  1.6060  4.3296
Au 12.6772  0.7735  3.0916
Au 15.8132  1.5941 -4.2230
Au 12.6592  3.7976 -1.1433
Au 16.7966  1.2664 -0.2673
Au 18.7235 -0.6386  1.4604
Au 10.7724 -0.2097  1.1336
Au 15.3429  3.4913 -2.0932
Au 19.4753  0.6762 -0.9994
Au 17.6569 -3.3159  1.2769
Au 11.4821  2.5549  1.1761
Au 17.9903  2.5025 -2.6060
Au 14.8287  4.6994  0.4815
Au 14.4376 -1.1565  4.3513
Au 14.1555  1.9136  0.4365
Au 18.8493 -2.0956 -1.0203
C  8.0974 -7.1900 -1.6337
C  7.2248 -8.1229 -1.0763
C  6.1707 -7.7137 -0.2477
C  7.9262 -5.8254 -1.3550
C  6.8795 -5.4048 -0.5205
C  6.0037 -6.3544  0.0200
O  8.8346 -4.9705 -1.9492
H  8.9188 -7.5035 -2.2777
H  7.3700 -9.1861 -1.2835
H  5.4919 -8.4461  0.1914
H  6.7229 -4.3517 -0.2893
H  5.1809 -6.0121  0.6516
C  8.6327 -3.5899 -1.6293
C  9.5817 -2.7619 -2.4107
C  9.8789 -2.2035 -3.4832
H 10.0002 -1.7804 -4.4653
H  8.7507 -3.4262 -0.5463
H  7.6117 -3.2751 -1.9185
56
TS1/B3	-177.30186 eV; -177.56454 eV
Au 18.8576  3.0421  0.6295
Au 13.2853 -2.2033  3.2158
Au 12.4945  1.3077 -3.2005
Au 14.3489 -3.2207 -1.5404
Au 14.6601  0.1384 -1.7044
Au 13.4834  3.3795  2.6826
Au 17.9954 -1.0336  3.4941
Au 16.0143 -2.9740  2.6913
Au 16.2759  3.6585  1.9362
Au 17.5065 -0.3092 -3.1737
Au 16.4621 -4.2022  0.1376
Au 16.5892 -1.3473 -0.1822
Au 16.7836  4.2936 -0.8054
Au 15.0352 -1.6686 -3.8336
Au 15.8862  0.1928  2.0290
Au 10.9290  0.2997 -0.9323
Au 11.6879 -2.8886 -0.2755
Au 12.4208 -1.4091 -2.6203
Au 18.1150  1.7810  3.0726
Au 17.0895 -3.0622 -2.4326
Au 13.8448 -1.2169  0.5925
Au 13.8123 -4.0395  1.1398
Au 15.5223  2.0156  4.1831
Au 13.1432  0.6265  3.3241
Au 15.1839  1.1482 -4.2732
Au 12.0285  2.9950 -1.0002
Au 16.7298  1.4630 -0.3360
Au 19.1188  0.0885  1.0904
Au 11.2740 -0.8466  1.7256
Au 14.5775  3.1579 -2.2945
Au 19.3284  1.2186 -1.5507
Au 18.5741 -2.7974  1.3543
Au 11.2604  1.9218  1.4631
Au 17.2949  2.5363 -2.9869
Au 14.1521  4.5219  0.1688
Au 15.3620 -0.8498  4.5973
Au 13.9865  1.6358  0.5291
Au 19.2100 -1.6173 -1.1967
C  5.6002 -5.6358 -0.0619
C  4.7424 -6.5652  0.5176
C  5.1826 -7.3708  1.5779
C  6.9166 -5.5100  0.4114
C  7.3688 -6.3126  1.4634
C  6.4940 -7.2408  2.0386
O  7.6704 -4.5581 -0.2294
H  5.2782 -4.9999 -0.8862
H  3.7202 -6.6581  0.1439
H  4.5100 -8.0969  2.0337
H  8.3885 -6.2314  1.8368
H  6.8501 -7.8611  2.8644
C  9.0165 -4.3803  0.2174
C  9.5511 -3.2086 -0.5106
C  9.2189 -2.2562 -1.2590
H  8.7799 -1.5459 -1.9327
H  9.6270 -5.2796  0.0279
H  9.0528 -4.1759  1.3004
56
TS1/B4	-177.32338 eV; -177.60194 eV
Au 19.4283  1.8161  0.5091
Au 12.3850 -0.4924  3.6078
Au 12.8261  1.9555 -3.2280
Au 12.6533 -3.0741 -1.1000
Au 14.3916  0.3368 -1.5368
Au 14.5628  4.5581  2.3538
Au 17.2491 -1.0696  3.8967
Au 14.6522 -2.1009  3.0759
Au 17.1460  3.4846  1.4863
Au 16.7213 -1.2297 -2.6809
Au 14.4683 -4.0916  0.9227
Au 15.5205 -1.4979  0.2324
Au 17.8599  3.5469 -1.2532
Au 13.9957 -1.8842 -3.3659
Au 15.6415  0.5563  2.1731
Au 11.4658  1.7700 -0.6953
Au 10.4680 -0.7916  0.2159
Au 11.8036 -0.5932 -2.2756
Au 18.2882  1.4028  3.0421
Au 15.4767 -3.6012 -1.6767
Au 13.1378 -0.0529  0.9239
Au 12.2008 -2.6321  1.6581
Au 15.9656  2.7327  3.9919
Au 13.1699  2.3031  3.5591
Au 15.1598  0.6699 -4.2216
Au 13.0227  4.0831 -1.3974
Au 16.8367  1.0055 -0.3235
Au 18.7402 -0.8867  1.3978
Au 10.8730  1.3378  2.0976
Au 15.4073  3.2585 -2.7916
Au 19.1264 -0.2931 -1.3936
Au 17.0385 -3.1594  1.9670
Au 12.1120  3.7402  1.2830
Au 17.6173  1.4617 -3.0876
Au 15.5219  4.9240 -0.3908
Au 14.8127  0.2513  4.8574
Au 14.5064  2.4102  0.4188
Au 18.0129 -2.7830 -0.6383
C  6.1417 -6.2270  0.6255
C  5.5827 -7.4452  1.0004
C  6.3528 -8.6188  0.9603
C  7.4776 -6.1718  0.1979
C  8.2620 -7.3317  0.1511
C  7.6826 -8.5537  0.5324
O  7.8821 -4.9133 -0.1808
H  5.5696 -5.2966  0.6504
H  4.5417 -7.4706  1.3328
H  5.9121 -9.5722  1.2573
H  9.3003 -7.3087 -0.1873
H  8.2849 -9.4641  0.4899
C  9.2801 -4.6137 -0.3527
C  9.2698 -3.1578 -0.4845
C  8.8522 -1.9901 -0.6023
H  8.0579 -1.3500 -0.9654
H  9.6893 -5.0775 -1.2698
H  9.8874 -4.9599  0.5025
56
IM1        -177.69986  eV ; -177.95558 eV  
Au 18.9153  2.2356  1.4196
Au 12.1666 -2.1647  2.5589
Au 13.0672  2.2102 -3.4982
Au 13.8406 -2.6861 -2.1611
Au 14.6655  0.3803 -1.9094
Au 13.4293  3.3904  2.7841
Au 16.9379 -1.8653  3.5466
Au 14.8092 -3.2654  2.2235
Au 16.2772  3.1529  2.3620
Au 17.5558 -0.3605 -2.8920
Au 15.4374 -4.3392 -0.3756
Au 16.0458 -1.5428 -0.3228
Au 17.3435  4.0155 -0.1395
Au 15.1595 -1.2284 -4.2569
Au 15.3117 -0.1149  1.9620
Au 11.5436  1.0225 -1.3540
Au 11.1105 -1.8968 -1.3741
Au 12.4516 -0.5706 -3.5501
Au 17.5442  0.8938  3.5224
Au 16.6543 -3.0769 -2.6648
Au 13.2611 -0.9320  0.1499
Au 12.7453 -3.7484  0.3011
Au 14.9118  1.5002  4.3083
Au 12.4915  0.6596  3.0364
Au 15.7768  1.5659 -4.2122
Au 12.5195  3.7380 -1.1358
Au 16.7049  1.2095 -0.1122
Au 18.5820 -0.7227  1.4630
Au 10.6371 -0.2795  1.0977
Au 15.2274  3.4007 -1.9906
Au 19.4072  0.6258 -0.9110
Au 17.5545 -3.4224  1.2582
Au 11.3071  2.4838  1.1316
Au 17.8633  2.4333 -2.4493
Au 14.6436  4.6788  0.5437
Au 14.2399 -1.2970  4.2992
Au 14.0064  1.8441  0.4315
Au 18.7895 -2.1774 -1.0035
C  6.1489 -6.2884  0.4569
C  5.6622 -7.1719  1.4157
C  6.3679 -7.3924  2.6054
C  7.3544 -5.6082  0.6845
C  8.0733 -5.8201  1.8678
C  7.5675 -6.7152  2.8199
O  7.7414 -4.7508 -0.3282
H  5.6177 -6.1061 -0.4778
H  4.7219 -7.6912  1.2322
H  5.9824 -8.0847  3.3544
H  9.0160 -5.3110  2.0651
H  8.1263 -6.8781  3.7422
C  8.9792 -4.0577 -0.1291
C  9.2031 -3.1813 -1.2783
C  9.1645 -2.5274 -2.3330
H  8.8509 -2.1024 -3.2703
H  9.8242 -4.7648 -0.0345
H  8.9549 -3.4492  0.7917
56
IM2-ene    -177.30209 eV; -177.20877 eV
Au 18.9072  2.1606  1.5215
Au 12.1729 -2.1226  2.5269
Au 13.1281  2.2585 -3.6042
Au 13.9302 -2.6899 -2.2233
Au 14.6273  0.4700 -1.9250
Au 13.4699  3.3965  2.7733
Au 16.9534 -1.8552  3.6288
Au 14.7914 -3.2379  2.1813
Au 16.3235  3.1348  2.3908
Au 17.6051 -0.3003 -2.8483
Au 15.4685 -4.2804 -0.3689
Au 16.0670 -1.4702 -0.3926
Au 17.4988  4.0112 -0.0618
Au 15.2288 -1.1365 -4.2411
Au 15.4096 -0.1442  1.9474
Au 11.5857  0.9850 -1.3924
Au 11.1229 -1.9951 -1.4734
Au 12.5175 -0.5529 -3.5668
Au 17.6278  0.8838  3.6458
Au 16.7486 -3.0263 -2.6671
Au 13.2615 -0.9005  0.1087
Au 12.7134 -3.6486  0.1785
Au 14.9467  1.4585  4.2650
Au 12.4824  0.6791  3.0262
Au 15.8663  1.6461 -4.1806
Au 12.6369  3.6675 -1.1873
Au 16.7196  1.2577 -0.1528
Au 18.7884 -0.7107  1.6190
Au 10.6244 -0.2912  1.0658
Au 15.3389  3.5561 -2.0786
Au 19.4195  0.6700 -0.8463
Au 17.5471 -3.2911  1.2867
Au 11.3517  2.4692  1.0692
Au 17.9479  2.4974 -2.4394
Au 14.7459  4.6164  0.4881
Au 14.2363 -1.3016  4.2568
Au 14.0496  1.8214  0.4872
Au 18.8397 -2.1051 -0.9148
C  5.1233 -6.0171 -4.4032
C  4.1493 -7.0021 -4.2383
C  4.0238 -7.6892 -3.0234
C  5.9860 -5.7022 -3.3415
C  5.8765 -6.3944 -2.1272
C  4.8932 -7.3797 -1.9782
O  6.9026 -4.7004 -3.5790
H  5.2226 -5.4725 -5.3436
H  3.4741 -7.2292 -5.0667
H  3.2560 -8.4528 -2.8940
H  6.5472 -6.1827 -1.2966
H  4.8156 -7.9071 -1.0268
C  7.6073 -4.2108 -2.4321
C  8.3444 -2.9565 -2.8282
C  9.5022 -2.5736 -2.3484
H  7.8108 -2.2994 -3.5355
H  8.3043 -4.9665 -2.0397
H  6.8821 -3.9573 -1.6401
56
IM2-f      -177.64808  eV ; -177.98290 eV
Au 18.9323  2.1124  1.0721
Au 12.1481 -2.2241  2.0432
Au 13.2590  2.1680 -3.8956
Au 13.9785 -2.7452 -2.5479
Au 14.7685  0.3145 -2.2930
Au 13.5020  3.3473  2.3375
Au 16.9816 -1.9242  3.1289
Au 14.8583 -3.1631  1.6428
Au 16.3478  3.0917  1.9820
Au 17.7469 -0.4026 -3.2692
Au 15.5573 -4.3993 -0.8408
Au 16.1829 -1.5921 -0.7487
Au 17.4336  3.9603 -0.5180
Au 15.3653 -1.2634 -4.6193
Au 15.4162 -0.1525  1.5185
Au 11.7249  0.9402 -1.7334
Au 11.1060 -2.0220 -1.7199
Au 12.6423 -0.6468 -3.8904
Au 17.6031  0.8167  3.2028
Au 16.8548 -3.1270 -3.0673
Au 13.3298 -1.0105 -0.2671
Au 12.7912 -3.8860 -0.1719
Au 14.9345  1.4360  3.8612
Au 12.5326  0.5998  2.5254
Au 15.9718  1.5369 -4.5704
Au 12.6665  3.6970 -1.5785
Au 16.7997  1.1637 -0.5611
Au 18.7662 -0.8079  1.1429
Au 10.6012 -0.3069  0.6510
Au 15.3879  3.4761 -2.4644
Au 19.5195  0.5602 -1.2490
Au 17.6612 -3.4484  0.8365
Au 11.3860  2.4533  0.6656
Au 18.0310  2.4069 -2.8163
Au 14.7487  4.6445  0.1253
Au 14.2324 -1.3476  3.7999
Au 14.1022  1.7976  0.0198
Au 18.9758 -2.2374 -1.3723
C  7.1820 -4.2628 -1.8313
C  6.4060 -4.0651 -3.0868
C  5.0373 -4.0844 -3.0469
C  6.3743 -4.0647 -0.5957
C  4.9898 -4.1151 -0.5777
C  4.3277 -4.1736 -1.8124
O  7.1327 -3.7865  0.4664
H  7.4890 -5.3417 -1.8195
H  6.9475 -3.9974 -4.0311
H  4.4693 -4.0206 -3.9766
H  4.4399 -4.0396  0.3605
H  3.2381 -4.2140 -1.8305
C  8.5265 -3.5703  0.0196
C  8.4698 -3.4972 -1.4860
C  9.3569 -2.9288 -2.3081
H  9.1833 -2.9797 -3.3897
H  9.1202 -4.4222  0.3894
H  8.8885 -2.6475  0.4969
56
IM2-s      -177.79902  eV ; -178.15657 eV 
Au 19.0567  2.1085  0.6934
Au 12.3125 -1.4431  3.3436
Au 12.7968  1.4510 -3.5172
Au 13.4582 -3.1187 -1.2109
Au 14.4642 -0.1127 -1.7373
Au 13.8378  3.9435  2.2237
Au 17.1882 -1.2381  3.8320
Au 14.8628 -2.6839  2.9563
Au 16.6000  3.4324  1.6310
Au 17.1881 -1.2325 -2.7973
Au 15.1650 -4.4284  0.7028
Au 15.8904 -1.7284  0.1078
Au 17.4193  3.6401 -1.0881
Au 14.6489 -2.2230 -3.7019
Au 15.4428  0.2235  2.0540
Au 11.4481  0.8671 -1.0358
Au 10.7563 -1.9817 -0.3081
Au 12.1001 -1.2333 -2.8393
Au 17.8829  1.3990  3.1639
Au 16.2139 -3.7753 -1.8871
Au 13.1625 -0.8479  0.6441
Au 12.5513 -3.5618  1.4927
Au 15.3724  2.3328  4.0062
Au 12.8179  1.3841  3.1466
Au 15.3801  0.4884 -4.3461
Au 12.5309  3.5174 -1.5543
Au 16.6924  0.9458 -0.3865
Au 18.7123 -0.7084  1.4359
Au 10.6786  0.1805  1.6960
Au 15.1234  2.8370 -2.5904
Au 19.2704  0.0394 -1.2742
Au 17.4992 -3.2854  1.8846
Au 11.5106  2.8317  1.0392
Au 17.6543  1.5807 -3.0223
Au 14.8541  4.6538 -0.3416
Au 14.5821 -0.3595  4.6845
Au 14.1019  1.8922  0.2371
Au 18.5462 -2.6560 -0.6829
C  6.6244 -3.1537 -1.5636
C  5.6845 -2.7090 -2.6278
C  5.1722 -3.5779 -3.5472
C  6.9593 -4.6059 -1.6227
C  6.4344 -5.4581 -2.5908
C  5.5336 -4.9575 -3.5314
O  7.8196 -5.0872 -0.7304
H  6.1491 -2.9628 -0.5727
H  5.4151 -1.6505 -2.6441
H  4.4791 -3.2195 -4.3098
H  6.7508 -6.5019 -2.6007
H  5.1149 -5.6316 -4.2797
C  8.5520 -4.0950  0.0951
C  8.9066 -2.8568 -0.6631
C  7.9727 -2.3835 -1.4976
H  8.0824 -1.5115 -2.1427
H  9.4151 -4.6594  0.4594
H  7.9005 -3.8537  0.9549
56
IM3-f      -178.15339  eV ; -178.37902 eV
Au 18.8425  2.1214  1.0447
Au 12.1290 -2.1900  2.0823
Au 13.1809  2.1606 -3.8570
Au 13.9107 -2.7567 -2.5602
Au 14.6809  0.2919 -2.2838
Au 13.4619  3.3831  2.3133
Au 16.9450 -1.8884  3.1117
Au 14.8222 -3.1925  1.6659
Au 16.3328  3.1643  1.9964
Au 17.6844 -0.3950 -3.2346
Au 15.4998 -4.4274 -0.8176
Au 16.1237 -1.5947 -0.7163
Au 17.4119  4.0002 -0.4862
Au 15.3025 -1.2630 -4.6103
Au 15.4065 -0.0875  1.5163
Au 11.5640  0.9133 -1.7693
Au 11.0549 -2.0344 -1.7188
Au 12.5716 -0.6456 -3.9114
Au 17.5728  0.8569  3.2200
Au 16.7653 -3.1204 -3.0320
Au 13.2888 -0.9768 -0.2325
Au 12.7523 -3.7982 -0.2002
Au 14.8949  1.4837  3.8433
Au 12.4892  0.6408  2.4902
Au 15.9096  1.5419 -4.5102
Au 12.5743  3.6771 -1.5646
Au 16.7342  1.1831 -0.6107
Au 18.7391 -0.7685  1.1526
Au 10.5651 -0.3195  0.5804
Au 15.3305  3.4741 -2.4206
Au 19.4950  0.5675 -1.2218
Au 17.6276 -3.4389  0.8556
Au 11.2902  2.4676  0.6562
Au 18.0047  2.4404 -2.8086
Au 14.6959  4.6691  0.1068
Au 14.2146 -1.3030  3.7802
Au 14.0340  1.8236  0.0100
Au 18.9031 -2.2274 -1.3582
C  7.1171 -3.8616 -1.8402
C  6.4123 -3.8330 -3.0374
C  5.0100 -3.8684 -2.9946
C  6.4307 -3.9247 -0.6210
C  5.0390 -3.9669 -0.5552
C  4.3381 -3.9371 -1.7673
O  7.2567 -3.9846  0.4719
H  6.9342 -3.7892 -3.9961
H  4.4406 -3.8446 -3.9235
H  4.5269 -4.0218  0.4066
H  3.2470 -3.9651 -1.7495
C  8.5962 -3.6682 -0.0032
C  8.6104 -3.9451 -1.5227
C  9.5555 -3.1540 -2.3472
H  9.4549 -3.3170 -3.4279
H  9.3100 -4.2721  0.5699
H  8.7976 -2.5957  0.1853
H  8.9006 -5.0092 -1.6934
56
IM3-s      -178.31133  eV ; -178.52766 eV
Au 19.0713  2.2627  0.2979
Au 12.3702 -0.9537  3.3053
Au 12.6510  1.7943 -3.6053
Au 13.0922 -2.7597 -1.3080
Au 14.3004  0.1678 -1.9159
Au 14.0663  4.2783  2.0696
Au 17.2110 -0.9237  3.5122
Au 14.8186 -2.3370  2.8206
Au 16.7909  3.7113  1.3713
Au 16.9701 -1.0082 -3.1579
Au 14.8969 -4.0648  0.5099
Au 15.7227 -1.4003 -0.0498
Au 17.4393  3.8482 -1.4242
Au 14.2330 -1.8608 -3.9053
Au 15.4820  0.6515  1.8341
Au 11.3751  1.3867 -1.0816
Au 10.5027 -1.3919 -0.3493
Au 11.7628 -0.8357 -2.8348
Au 18.0652  1.6700  2.8509
Au 15.8170 -3.3889 -2.1056
Au 13.0938 -0.4396  0.5362
Au 12.3978 -3.0875  1.4807
Au 15.6154  2.6891  3.8420
Au 12.9125  1.8545  3.0997
Au 15.1541  0.7788 -4.5376
Au 12.5480  3.9480 -1.6693
Au 16.6308  1.1964 -0.6959
Au 18.6562 -0.5075  1.0658
Au 10.7373  0.6474  1.6203
Au 15.0598  3.1550 -2.8276
Au 19.1941  0.2394 -1.6522
Au 17.3475 -3.0348  1.5938
Au 11.6193  3.3168  1.0269
Au 17.5265  1.7804 -3.3645
Au 14.9766  4.9536 -0.5253
Au 14.7239  0.0577  4.4924
Au 14.1023  2.2488  0.0136
Au 18.2628 -2.4003 -1.0529
C  7.0704 -2.8757 -2.1856
C  6.2983 -2.5385 -3.3040
C  5.8832 -3.5102 -4.2145
C  7.4416 -4.2173 -2.0015
C  7.0445 -5.1994 -2.9210
C  6.2635 -4.8436 -4.0181
O  8.2189 -4.6486 -0.9561
H  6.7658 -1.5763 -0.4957
H  6.0305 -1.4904 -3.4587
H  5.2831 -3.2261 -5.0794
H  7.3652 -6.2299 -2.7563
H  5.9539 -5.6120 -4.7277
C  8.5240 -3.6708  0.0877
C  8.7489 -2.3032 -0.4616
C  7.5727 -1.8078 -1.2242
H  7.7754 -0.8721 -1.7603
H  9.3941 -4.0810  0.6125
H  7.6630 -3.6495  0.7899
56
IM4-f      -179.69325  eV ; -179.97034 eV
Au 18.7788  2.4101  1.0142
Au 12.2584 -2.1594  2.1600
Au 13.0571  2.0328 -3.9713
Au 13.9654 -3.0294 -2.6960
Au 14.6689  0.3306 -2.3271
Au 13.1976  3.3534  2.3013
Au 17.0587 -1.6756  3.2084
Au 14.9748 -2.9755  1.7270
Au 16.0365  3.1068  1.7741
Au 17.5224 -0.2646 -3.1387
Au 15.6547 -4.3301 -0.7439
Au 16.1315 -1.4897 -0.7276
Au 17.1248  4.1259 -0.6656
Au 15.2977 -1.3417 -4.5997
Au 15.3564 -0.0465  1.5579
Au 11.6277  0.7668 -1.7857
Au 11.2204 -2.1146 -1.7603
Au 12.6108 -0.8385 -3.9421
Au 17.4818  1.0843  3.1355
Au 16.8862 -3.0575 -2.9710
Au 13.3497 -0.9954 -0.2283
Au 12.9561 -3.8054 -0.1184
Au 14.7472  1.5753  3.8317
Au 12.2166  0.6483  2.8188
Au 15.7762  1.5359 -4.6372
Au 12.3889  3.5530 -1.7051
Au 16.6568  1.2926 -0.5720
Au 18.8845 -0.5316  1.2266
Au 10.6357 -0.4644  0.6646
Au 15.0996  3.6617 -2.7138
Au 19.3774  0.8396 -1.2605
Au 17.7266 -3.1773  0.9150
Au 11.2166  2.2845  0.6255
Au 17.7534  2.5688 -2.9097
Au 14.4033  4.6084 -0.0488
Au 14.2318 -1.1951  3.9157
Au 13.9338  1.7951 -0.0127
Au 18.9732 -1.9584 -1.2849
C  7.4581 -3.1955 -1.7954
C  6.8199 -2.6816 -2.9394
C  5.4627 -2.3807 -2.8717
C  6.7098 -3.3946 -0.6139
C  5.3505 -3.0890 -0.5289
C  4.7406 -2.5790 -1.6769
O  7.4347 -3.9440  0.3941
H  7.3784 -2.5290 -3.8647
H  4.9488 -1.9883 -3.7492
H  4.7997 -3.2516  0.3974
H  3.6749 -2.3419 -1.6529
C  8.7856 -4.1397 -0.1091
C  8.7832 -3.6948 -1.5509
C  9.8573 -3.8103 -2.4320
H  9.6727 -3.5908 -3.4872
H  9.0441 -5.2009  0.0202
H  9.4627 -3.5278  0.5103
H 10.6019 -4.5884 -2.2507
56
IM4-s      -179.63617  eV ; -179.90746 eV
Au 19.1562  2.3156  0.2522
Au 12.3270 -0.9285  3.3207
Au 12.5835  1.8421 -3.5851
Au 13.1619 -2.6900 -1.2820
Au 14.3351  0.2479 -1.9035
Au 14.0594  4.3107  2.0450
Au 17.1854 -0.9771  3.4950
Au 14.7822 -2.3905  2.8783
Au 16.7867  3.7635  1.3311
Au 16.8976 -1.0163 -3.0991
Au 14.8802 -4.0860  0.5534
Au 15.7480 -1.4135 -0.0951
Au 17.4742  3.8789 -1.4369
Au 14.2309 -1.8492 -3.8347
Au 15.4339  0.5791  1.8376
Au 11.2561  1.3727 -1.0658
Au 10.6377 -1.4698 -0.2675
Au 11.7675 -0.7648 -2.8511
Au 17.9978  1.6294  2.7501
Au 15.8227 -3.4752 -2.0975
Au 13.0955 -0.3894  0.5581
Au 12.3900 -3.0506  1.4726
Au 15.6129  2.6892  3.7810
Au 12.9530  1.8560  3.0631
Au 15.0828  0.7939 -4.5808
Au 12.5193  3.9476 -1.6519
Au 16.6526  1.2425 -0.6225
Au 18.5429 -0.5258  1.0114
Au 10.6983  0.7545  1.7202
Au 15.0340  3.1168 -2.7725
Au 19.1022  0.1697 -1.6858
Au 17.3189 -3.0981  1.6027
Au 11.6067  3.3524  0.9962
Au 17.4625  1.7638 -3.3368
Au 14.9761  4.9748 -0.5588
Au 14.7162  0.0329  4.5154
Au 14.0886  2.2676  0.0446
Au 18.2764 -2.5222 -1.0436
C  7.8651 -2.6938 -1.8352
C  7.2479 -2.3045 -3.0390
C  6.9945 -3.2340 -4.0449
C  8.2133 -4.0550 -1.6605
C  7.9888 -4.9841 -2.6774
C  7.3769 -4.5706 -3.8629
O  8.8549 -4.4807 -0.5265
H  8.5413 -1.6162  1.3567
H  6.9750 -1.2552 -3.1761
H  6.5081 -2.9231 -4.9708
H  8.2863 -6.0212 -2.5173
H  7.1935 -5.3018 -4.6510
C  8.5557 -3.7355  0.6758
C  8.5935 -2.2474  0.4640
C  8.1714 -1.7652 -0.7685
H  7.9486 -0.7056 -0.9053
H  9.2989 -4.0658  1.4107
H  7.5493 -4.0297  1.0376
55
IM5        -179.92217  eV ; -180.99423 eV 
Au 19.0645  2.5185  0.5758
Au 12.3563 -1.1030  3.2074
Au 12.8589  1.8058 -3.6590
Au 13.5697 -2.7625 -1.3355
Au 14.5110  0.2501 -1.8636
Au 13.8414  4.3191  2.0923
Au 17.2383 -0.8373  3.7018
Au 14.9272 -2.3027  2.8117
Au 16.6094  3.8260  1.5042
Au 17.2656 -0.8353 -2.9233
Au 15.2663 -4.0703  0.5747
Au 15.9508 -1.3541 -0.0252
Au 17.4359  4.0380 -1.2170
Au 14.7442 -1.8554 -3.8362
Au 15.4866  0.6035  1.9106
Au 11.5282  1.2094 -1.1693
Au 10.8325 -1.6666 -0.4874
Au 12.1873 -0.8958 -2.9825
Au 17.9106  1.8034  3.0456
Au 16.3301 -3.3959 -2.0189
Au 13.2108 -0.5070  0.5185
Au 12.6351 -3.2363  1.3705
Au 15.3872  2.7159  3.8735
Au 12.8482  1.7303  2.9789
Au 15.4483  0.8642 -4.4758
Au 12.5609  3.8776 -1.7020
Au 16.7234  1.3290 -0.5321
Au 18.7915 -0.3015  1.3241
Au 10.7144  0.4965  1.5322
Au 15.1601  3.2302 -2.7369
Au 19.3317  0.4611 -1.3916
Au 17.5754 -2.8832  1.7589
Au 11.5266  3.1842  0.8963
Au 17.7010  1.9853 -3.1490
Au 14.8615  5.0332 -0.4738
Au 14.6167  0.0185  4.5371
Au 14.1327  2.2622  0.1047
Au 18.6329 -2.2369 -0.8011
C  7.0959 -2.9840 -2.4155
C  6.1293 -2.5044 -3.3137
C  5.0687 -3.3056 -3.7446
C  6.9683 -4.3099 -1.9436
C  5.9119 -5.1219 -2.3739
C  4.9656 -4.6186 -3.2716
O  7.8439 -4.8534 -1.0548
H  6.2263 -1.4799 -3.6786
H  4.3331 -2.9061 -4.4435
H  5.8464 -6.1447 -2.0004
H  4.1455 -5.2593 -3.6021
C  9.0273 -4.0931 -0.6182
C  9.1523 -2.6833 -1.1131
C  8.2276 -2.1825 -1.9623
H  8.3040 -1.1653 -2.3469
H  9.9023 -4.6884 -0.9309
H  8.9961 -4.1184  0.4829
73
IM6-fs       -272.86767  eV ; -274.21105 eV 
Au 18.8008  3.0105  1.1822
Au 12.7057 -1.8532  2.8330
Au 13.0787  1.3273 -3.5145
Au 14.4004 -3.2858 -1.2170
Au 15.0174  0.2315 -1.7210
Au 13.2160  3.7138  2.2880
Au 17.1858 -0.7697  4.0306
Au 15.3834 -2.7971  3.1103
Au 16.0784  3.8336  1.9786
Au 17.9997 -0.6094 -2.8067
Au 16.2325 -4.2868  0.7472
Au 16.1784 -1.4681  0.1945
Au 16.9831  4.0737 -0.7133
Au 15.5116 -1.8771 -3.5075
Au 15.2619  0.2526  2.1356
Au 11.2990  0.6656 -1.3455
Au 11.5840 -3.0111 -0.5445
Au 12.8139 -1.3608 -2.6226
Au 17.5461  1.9255  3.4741
Au 17.2706 -3.2504 -1.7743
Au 13.2801 -0.8799  0.2633
Au 13.5058 -4.1142  1.4522
Au 14.8377  2.2913  4.1255
Au 12.5580  0.9787  2.8668
Au 15.8605  0.8331 -4.3536
Au 12.2902  3.3838 -1.6549
Au 16.8373  1.3090  0.0694
Au 18.9682  0.1323  1.8273
Au 10.6803 -0.5165  1.1712
Au 15.0081  3.1413 -2.4939
Au 19.5297  1.1157 -0.9124
Au 18.0461 -2.5699  2.0544
Au 11.1711  2.4107  0.7915
Au 17.6680  2.1811 -2.6755
Au 14.2886  4.7652 -0.1407
Au 14.3851 -0.5237  4.6840
Au 14.0456  1.9533  0.2258
Au 19.0630 -1.6032 -0.3663
C  8.6422 -5.4619 -2.6745
C  7.7679 -5.3568 -3.7691
C  7.0808 -6.4716 -4.2594
C  8.8156 -6.7340 -2.0787
C  8.1254 -7.8509 -2.5570
C  7.2591 -7.7167 -3.6475
O  9.6053 -6.8898 -0.9727
H  7.6293 -4.3764 -4.2335
H  6.4062 -6.3627 -5.1110
H  8.2793 -8.8114 -2.0639
H  6.7241 -8.5909 -4.0202
C 10.6906 -5.9219 -0.7981
C 10.3523 -4.5154 -1.2009
C  9.3690 -4.3309 -2.1116
H  9.1145 -3.3342 -2.4813
H 11.5668 -6.2728 -1.3784
H 10.9439 -5.9971  0.2666
C  8.9559 -1.1674  2.4407
C  8.4657 -0.5714  1.4569
H  9.0494 -1.7172  3.3625
C  7.5149 -0.0193  0.4929
H  7.5618  1.0818  0.5194
O  6.1969 -0.4951  0.8340
H  7.7913 -0.3446 -0.5215
C  5.1941 -0.2311 -0.0680
C  5.3223  0.6133 -1.1805
C  3.9707 -0.8732  0.1892
C  2.8874 -0.6700 -0.6624
C  3.0046  0.1719 -1.7770
C  4.2227  0.8058 -2.0271
H  4.3331  1.4654 -2.8903
H  2.1564  0.3265 -2.4454
H  1.9440 -1.1811 -0.4610
H  3.9002 -1.5329  1.0559
H  6.2617  1.1212 -1.3967
73
IM6-ss     -272.83014  eV ; -274.07876 eV
Au 23.7594  1.5866 -5.1369
Au 17.1939 -1.9623 -2.5243
Au 17.6575  1.0227 -9.4288
Au 18.4402 -3.5615 -7.1043
Au 19.1647 -0.7060 -7.6002
Au 18.6444  3.4777 -3.6351
Au 22.1027 -1.7371 -2.0425
Au 19.7973 -3.1464 -2.9741
Au 21.4551  3.0292 -4.1510
Au 22.1684 -1.7475 -8.7043
Au 20.1142 -4.9232 -5.2010
Au 20.8326 -2.2304 -5.7879
Au 22.2313  3.1312 -6.9237
Au 19.6808 -2.7803 -9.5848
Au 20.3782 -0.2407 -3.8640
Au 16.4218  0.2513 -6.9403
Au 15.6611 -2.5648 -6.1296
Au 17.0287 -1.7987 -8.9493
Au 22.7366  0.9295 -2.6183
Au 21.2440 -4.3132 -7.7749
Au 18.0661 -1.3859 -5.1479
Au 17.5023 -4.1177 -4.4002
Au 20.2266  1.8748 -1.8589
Au 17.7240  0.8654 -2.8102
Au 20.2499 -0.0270 -10.1122
Au 17.3664  3.0289 -7.4304
Au 21.4460  0.4204 -6.4054
Au 23.6514 -1.1915 -4.3511
Au 15.5261 -0.3331 -4.1963
Au 19.9726  2.3794 -8.4896
Au 24.1036 -0.4111 -7.0900
Au 22.4551 -3.8101 -3.9801
Au 16.3283  2.2947 -4.8765
Au 22.5481  1.1177 -8.9353
Au 19.6954  4.1254 -6.1805
Au 19.4861 -0.8409 -1.2478
Au 18.9327  1.3880 -5.6270
Au 23.5000 -3.1062 -6.5134
C 11.5915 -3.8581 -7.3355
C 10.3110 -3.3543 -7.6275
C  9.3046 -4.1645 -8.1607
C 11.8332 -5.2244 -7.6193
C 10.8245 -6.0480 -8.1287
C  9.5601 -5.5176 -8.4025
O 13.0415 -5.7959 -7.3355
H 10.0984 -2.3023 -7.4335
H  8.3255 -3.7356 -8.3813
H 11.0553 -7.0990 -8.3124
H  8.7809 -6.1638 -8.8119
C 14.1769 -4.8847 -7.3915
C 13.9381 -3.5451 -6.7469
C 12.6678 -3.0561 -6.7223
H 12.3944 -2.0973 -6.2813
H 14.4560 -4.7457 -8.4559
H 14.9851 -5.4371 -6.8981
C 10.6041 -1.5762 -11.1638
C  9.3607 -0.9528 -11.1087
C  9.1993  0.2567 -10.4182
C 11.7120 -0.9909 -10.5292
C 11.5599  0.2138 -9.8284
C 10.3025  0.8288 -9.7833
O 12.8922 -1.6777 -10.6618
H 10.7462 -2.5274 -11.6784
H  8.5042 -1.4238 -11.5984
H  8.2226  0.7425 -10.3788
H 12.4015  0.6854 -9.3239
H 10.1935  1.7696 -9.2408
C 14.0094 -1.1946 -9.8940
C 15.1415 -2.1010 -10.1036
C 15.8429 -3.0657 -10.4696
H 16.2371 -3.9818 -10.9148
H 13.7595 -1.1812 -8.8200
H 14.2868 -0.1716 -10.2004
73
IM7-fs       -272.72887  eV ; -274.08602 eV
Au 18.8308  2.8504  0.8146
Au 12.4310 -1.6160  2.8725
Au 13.1098  1.6005 -3.8872
Au 13.9476 -2.8132 -1.4626
Au 14.6941  0.1005 -1.9949
Au 13.4601  4.0214  1.9629
Au 17.1380 -0.7539  3.6419
Au 15.1280 -2.5955  2.7982
Au 16.3073  4.0124  1.6691
Au 17.7552 -0.5818 -3.0737
Au 15.6611 -4.1293  0.4206
Au 16.0248 -1.3337  0.0033
Au 17.1657  4.1567 -1.0525
Au 15.3055 -1.7760 -4.0587
Au 15.4289  0.6549  1.8095
Au 11.6070  0.8120 -1.5571
Au 11.1456 -2.1159 -1.0367
Au 12.5974 -1.1654 -3.3863
Au 17.6376  1.9731  3.1951
Au 16.7564 -3.1331 -2.0725
Au 13.1999 -0.6521  0.3449
Au 13.0480 -3.8919  1.4148
Au 14.9566  2.5863  3.8569
Au 12.6623  1.2612  2.5757
Au 15.8141  0.9894 -4.5287
Au 12.4363  3.6095 -1.9698
Au 16.7631  1.3653 -0.5738
Au 18.7694  0.0185  1.4210
Au 10.5231 -0.1372  1.1024
Au 15.1615  3.2504 -2.7938
Au 19.5117  0.9203 -1.2226
Au 17.8068 -2.7181  1.7048
Au 11.3708  2.7108  0.5273
Au 17.8371  2.2859 -3.0708
Au 14.5124  4.9807 -0.4843
Au 14.4357 -0.2322  4.3026
Au 14.1120  2.1543 -0.1440
Au 18.8572 -1.8034 -0.7587
C  8.7075 -5.0281 -3.2834
C  7.9358 -5.1564 -4.4529
C  7.5142 -6.4052 -4.9221
C  9.0528 -6.2192 -2.5987
C  8.6116 -7.4679 -3.0451
C  7.8457 -7.5625 -4.2107
O  9.7735 -6.1788 -1.4380
H  7.6584 -4.2576 -5.0057
H  6.9232 -6.4714 -5.8375
H  8.8947 -8.3522 -2.4722
H  7.5210 -8.5423 -4.5677
C 10.7034 -5.0617 -1.3422
C 10.1320 -3.7476 -1.7880
C  9.1596 -3.7369 -2.7386
H  8.7143 -2.8155 -3.1372
H 11.6098 -5.3031 -1.9354
H 11.0009 -5.0461 -0.2836
C  7.7707 -1.1813  1.9534
C  8.4559 -0.2113  1.3259
H  8.1759 -2.0531  2.4661
C  7.6580  0.8731  0.6714
H  7.2719  1.5865  1.4253
O  6.4828  0.3594 -0.0687
H  8.2118  1.4353 -0.0872
C  5.8574 -0.6792  0.4886
C  6.1973 -1.0243  1.8984
C  4.9542 -1.4117 -0.2746
C  4.2784 -2.4950  0.2927
C  4.5053 -2.8573  1.6480
C  5.3953 -2.1670  2.4258
H  5.5484 -2.4487  3.4695
H  3.9531 -3.6976  2.0729
H  3.5819 -3.0725 -0.3159
H  4.8109 -1.1348 -1.3197
H  6.0024 -0.1279  2.5321
73
IM7-fs       -272.76292  eV ; -274.11918 eV  
Au 24.0485  1.2451 -5.1890
Au 17.3842 -2.3380 -2.5295
Au 17.9686  0.6988 -9.4678
Au 18.6308 -3.8374 -7.1351
Au 19.3680 -1.0735 -7.6427
Au 18.9415  3.0934 -3.6679
Au 22.3047 -2.1110 -2.1275
Au 19.9907 -3.5075 -3.0289
Au 21.7369  2.6622 -4.2004
Au 22.4000 -2.0355 -8.7203
Au 20.3063 -5.2662 -5.2541
Au 21.0530 -2.5550 -5.8171
Au 22.5198  2.8056 -6.9537
Au 19.9190 -3.0699 -9.6530
Au 20.6469 -0.5805 -3.9037
Au 16.6910 -0.0850 -6.9240
Au 15.8975 -2.8442 -6.1397
Au 17.1750 -2.1573 -9.0619
Au 23.0176  0.5594 -2.6640
Au 21.4267 -4.5783 -7.7908
Au 18.2935 -1.7039 -5.1329
Au 17.6925 -4.4597 -4.4340
Au 20.4695  1.4807 -1.9075
Au 17.9423  0.4922 -2.7907
Au 20.5331 -0.3313 -10.1302
Au 17.6688  2.6297 -7.4338
Au 21.7160  0.0764 -6.4679
Au 23.9037 -1.5451 -4.4286
Au 15.7235 -0.6619 -4.1506
Au 20.2767  2.0698 -8.5287
Au 24.3865 -0.7534 -7.1440
Au 22.6730 -4.1580 -4.0540
Au 16.6171  1.9393 -4.8664
Au 22.8540  0.8168 -8.9713
Au 19.9710  3.8038 -6.2099
Au 19.7082 -1.2235 -1.2868
Au 19.2174  1.0270 -5.6672
Au 23.7495 -3.4596 -6.5766
C 11.8367 -4.1668 -7.2624
C 10.4937 -3.7627 -7.1694
C  9.4565 -4.5557 -7.6732
C 12.1168 -5.4129 -7.8745
C 11.0874 -6.2017 -8.3978
C  9.7580 -5.7756 -8.2913
O 13.4022 -5.8414 -8.0414
H 10.2693 -2.7998 -6.7003
H  8.4211 -4.2209 -7.5815
H 11.3478 -7.1440 -8.8828
H  8.9565 -6.4058 -8.6847
C 14.3914 -5.3087 -7.1000
C 14.2060 -3.8631 -6.7369
C 12.9565 -3.3483 -6.8073
H 12.7398 -2.3154 -6.5210
H 15.3481 -5.4826 -7.6033
H 14.3660 -5.9325 -6.1847
C 13.9337 -3.2773 -11.9632
C 13.5214 -4.5171 -12.6761
C 12.2711 -5.0499 -12.5355
C 12.8650 -2.7072 -11.0897
C 11.6125 -3.2952 -10.9520
C 11.3071 -4.4477 -11.6787
O 13.1520 -1.6121 -10.3875
H 14.2015 -2.4983 -12.7174
H 14.2694 -4.9946 -13.3125
H 12.0080 -5.9629 -13.0722
H 10.9054 -2.8698 -10.2392
H 10.3301 -4.9136 -11.5472
C 14.5760 -1.2099 -10.3324
C 15.5228 -2.3706 -10.2996
C 15.2104 -3.4086 -11.0830
H 15.7656 -4.3438 -11.1443
H 14.6251 -0.5751 -9.4419
H 14.7682 -0.5822 -11.2232
72
IM8-fs       -272.88333  eV ; -276.66942 eV
Au 18.9758  2.5198  0.5594
Au 12.4028 -1.1338  3.2809
Au 12.7752  1.8114 -3.7475
Au 13.4724 -2.6412 -1.3414
Au 14.3778  0.2887 -1.8934
Au 13.8232  4.3148  2.0599
Au 17.1414 -0.8658  3.6795
Au 14.8979 -2.5964  3.1362
Au 16.6375  3.9722  1.5525
Au 17.3194 -0.8884 -3.1933
Au 15.1739 -4.0786  0.5635
Au 15.7073 -1.3470  0.0019
Au 17.3273  3.9772 -1.2075
Au 14.6531 -1.7744 -3.8618
Au 15.4405  0.6491  1.8848
Au 11.3584  1.2430 -1.2701
Au 10.8024 -1.7327 -0.5454
Au 12.0530 -0.8485 -3.0700
Au 17.8318  1.8086  3.0388
Au 16.1756 -3.3277 -2.0709
Au 12.9968 -0.3067  0.5674
Au 12.6932 -3.1157  1.4009
Au 15.3215  2.7614  3.8606
Au 12.8426  1.6612  2.8041
Au 15.4089  0.8641 -4.5501
Au 12.4750  3.8841 -1.7671
Au 16.6629  1.2505 -0.5861
Au 18.5947 -0.2755  1.2615
Au 10.4465  0.4319  1.5336
Au 15.0836  3.1431 -2.7070
Au 19.3015  0.4582 -1.4583
Au 17.4275 -2.8775  1.7413
Au 11.5021  3.1761  0.8065
Au 17.6291  1.9527 -3.1922
Au 14.8139  5.0931 -0.4971
Au 14.6136  0.0252  4.5151
Au 14.1295  2.3276  0.0227
Au 18.3807 -2.1476 -0.8425
C  8.2019 -4.2453 -3.0676
C  7.5739 -4.2091 -4.3223
C  7.0840 -5.3700 -4.9305
C  8.3145 -5.4989 -2.4192
C  7.8263 -6.6627 -3.0175
C  7.2143 -6.5982 -4.2745
O  8.8469 -5.5948 -1.1660
H  7.4795 -3.2435 -4.8260
H  6.6089 -5.3167 -5.9123
H  7.9450 -7.6108 -2.4891
H  6.8533 -7.5158 -4.7443
C  9.8355 -4.5766 -0.7964
C  9.5809 -3.1992 -1.3354
C  8.7733 -3.0718 -2.4160
H  8.5914 -2.0976 -2.8773
H 10.8342 -4.9199 -1.1327
H  9.8342 -4.5905  0.3005
C  7.7054 -0.2050  2.6940
C  8.4112  0.5553  1.8229
H  8.2060 -0.8835  3.3893
C  7.6466  1.4104  0.8529
H  8.1294  2.3826  0.6947
O  6.2800  1.7543  1.2623
H  7.5966  0.8975 -0.1272
C  5.5795  0.7919  1.9299
C  6.2474 -0.1974  2.6906
C  4.1832  0.8539  1.8999
C  3.4264 -0.0820  2.6160
C  4.0654 -1.0743  3.3664
C  5.4628 -1.1209  3.3998
H  5.9697 -1.8910  3.9862
H  3.4783 -1.8098  3.9209
H  2.3360 -0.0376  2.5769
H  3.7045  1.6347  1.3052
72
IM8-ss       -272.88187  eV ; -276.66015 eV
Au 23.8165  1.5970 -5.1987
Au 17.2135 -2.0056 -2.4254
Au 17.6685  1.0284 -9.3898
Au 18.3980 -3.4507 -7.0381
Au 19.1148 -0.6995 -7.5957
Au 18.7160  3.5074 -3.6181
Au 22.0867 -1.7327 -2.0478
Au 19.7938 -3.3204 -2.7188
Au 21.5310  3.0803 -4.1650
Au 22.2773 -1.7995 -8.9204
Au 20.0752 -4.8583 -5.1474
Au 20.8050 -2.1814 -5.7751
Au 22.2418  3.1316 -6.9352
Au 19.6547 -2.7353 -9.5941
Au 20.4350 -0.2108 -3.8592
Au 16.4353  0.2972 -6.8285
Au 15.7362 -2.5256 -6.0225
Au 16.9029 -1.7962 -8.9875
Au 22.8073  0.9378 -2.6467
Au 21.1571 -4.2020 -7.7442
Au 18.0934 -1.3338 -5.0477
Au 17.5262 -4.1153 -4.2707
Au 20.2714  1.8722 -1.8905
Au 17.8082  0.8304 -2.8372
Au 20.2682 -0.0426 -10.1204
Au 17.3554  3.0298 -7.3774
Au 21.4613  0.4310 -6.4276
Au 23.6040 -1.1709 -4.4242
Au 15.5470 -0.3165 -4.1007
Au 19.9804  2.2568 -8.3614
Au 24.1185 -0.4378 -7.1603
Au 22.4091 -3.7610 -3.9796
Au 16.3435  2.3650 -4.7754
Au 22.5798  1.0789 -8.9674
Au 19.7043  4.1829 -6.1798
Au 19.5182 -0.8584 -1.2359
Au 18.9556  1.4114 -5.6071
Au 23.4562 -3.0974 -6.5631
C 11.6497 -3.8420 -7.0232
C 10.3692 -3.3174 -7.2609
C  9.3113 -4.1288 -7.6848
C 11.8497 -5.2256 -7.2439
C 10.7924 -6.0490 -7.6399
C  9.5238 -5.5010 -7.8631
O 13.0603 -5.8085 -7.0018
H 10.2126 -2.2459 -7.1148
H  8.3296 -3.6879 -7.8760
H 10.9940 -7.1115 -7.7851
H  8.7076 -6.1479 -8.1952
C 14.2285 -4.9249 -7.1152
C 14.0290 -3.5480 -6.5541
C 12.7711 -3.0495 -6.5370
H 12.5632 -2.0389 -6.1795
H 14.5055 -4.8500 -8.1848
H 15.0240 -5.4752 -6.5986
C 13.6610 -3.2479 -11.6110
C 13.3915 -4.2399 -12.5678
C 12.1319 -4.3618 -13.1652
C 12.6181 -2.3549 -11.2693
C 11.3515 -2.4808 -11.8489
C 11.1092 -3.4806 -12.7973
O 12.7792 -1.3960 -10.3159
H 14.1922 -4.9374 -12.8299
H 11.9492 -5.1479 -13.9015
H 10.5693 -1.7909 -11.5295
H 10.1139 -3.5713 -13.2402
C 14.1491 -1.0101 -9.9560
C 15.1860 -2.0822 -10.0939
C 14.9351 -3.1279 -10.9131
H 15.6735 -3.9178 -11.0672
H 14.0638 -0.6604 -8.9194
H 14.4303 -0.1386 -10.5796
56
TS1/2-ene  -176.33969 eV; -177.20877 eV
Au 19.1208  2.2887  1.6187
Au 12.2984 -2.0267  2.5322
Au 13.3912  2.5609 -3.4636
Au 14.1204 -2.4583 -2.2312
Au 14.8911  0.5862 -1.8814
Au 13.6094  3.4928  2.8905
Au 17.1073 -1.7614  3.6538
Au 14.9790 -3.0133  2.1492
Au 16.4419  3.1573  2.4446
Au 17.7735 -0.1642 -2.7123
Au 15.6481 -4.1360 -0.4086
Au 16.2900 -1.3533 -0.3100
Au 17.5930  4.1399  0.0193
Au 15.5275 -1.0279 -4.2678
Au 15.5591  0.0258  2.0186
Au 11.9661  1.2658 -1.3265
Au 11.4536 -1.5743 -1.4405
Au 12.8609 -0.2453 -3.6722
Au 17.7406  0.9670  3.6949
Au 16.9663 -2.9146 -2.6411
Au 13.5264 -0.7482  0.1976
Au 12.9318 -3.5429  0.1973
Au 15.0533  1.5503  4.3881
Au 12.5830  0.7888  3.1398
Au 16.0809  1.7949 -4.1338
Au 12.7892  4.0109 -1.0581
Au 16.9197  1.3787 -0.0666
Au 18.9554 -0.6274  1.6741
Au 10.8556 -0.0982  1.0558
Au 15.5111  3.6746 -1.9217
Au 19.6313  0.7932 -0.7288
Au 17.7349 -3.2125  1.3110
Au 11.5269  2.6450  1.1716
Au 18.1364  2.6283 -2.3340
Au 14.8883  4.8177  0.6825
Au 14.3517 -1.2012  4.2932
Au 14.2349  2.0139  0.5114
Au 19.0599 -1.9924 -0.8661
C  5.4307 -5.9752 -4.3063
C  4.4853 -6.9929 -4.1807
C  4.3501 -7.7083 -2.9833
C  6.2477 -5.6579 -3.2132
C  6.1293 -6.3718 -2.0144
C  5.1806 -7.3946 -1.9103
O  7.1509 -4.6203 -3.3975
H  5.5391 -5.4082 -5.2330
H  3.8408 -7.2296 -5.0280
H  3.6098 -8.5015 -2.8918
H  6.7592 -6.1539 -1.1541
H  5.1012 -7.9394 -0.9702
C  7.8075 -4.2176 -2.2011
C  8.8371 -3.2168 -2.4205
C  9.8149 -2.4368 -2.2395
H  8.7232 -1.8890 -2.4893
H  8.3498 -5.0605 -1.7317
H  7.0655 -3.8339 -1.4768
56
TS1/2-f    -177.09207  eV ; -177.39748 eV
Au 18.9252  2.0932  1.1025
Au 12.1280 -2.2836  1.9515
Au 13.2939  2.1752 -3.9367
Au 14.0056 -2.7588 -2.6410
Au 14.7927  0.3134 -2.3328
Au 13.4576  3.2937  2.3068
Au 16.9593 -1.9779  3.0942
Au 14.8517 -3.2037  1.5641
Au 16.3079  3.0519  1.9745
Au 17.7724 -0.3858 -3.2720
Au 15.5780 -4.4214 -0.9217
Au 16.1972 -1.6048 -0.7965
Au 17.4337  3.9601 -0.4901
Au 15.4127 -1.2377 -4.6730
Au 15.4055 -0.1878  1.4837
Au 11.7367  0.9385 -1.8071
Au 11.1969 -1.9582 -1.8687
Au 12.6873 -0.6295 -3.9985
Au 17.5534  0.7705  3.1784
Au 16.8874 -3.1157 -3.1158
Au 13.3557 -1.0422 -0.3140
Au 12.7997 -3.9142 -0.2834
Au 14.8777  1.3723  3.8363
Au 12.4987  0.5436  2.4600
Au 16.0173  1.5636 -4.5824
Au 12.6730  3.6855 -1.6078
Au 16.8028  1.1570 -0.5627
Au 18.7479 -0.8343  1.1244
Au 10.5918 -0.3656  0.5557
Au 15.4024  3.4787 -2.4643
Au 19.5329  0.5689 -1.2314
Au 17.6576 -3.4770  0.7893
Au 11.3574  2.4050  0.6044
Au 18.0462  2.4227 -2.7942
Au 14.7269  4.6203  0.1254
Au 14.1947 -1.4158  3.7311
Au 14.0917  1.7725 -0.0194
Au 18.9963 -2.2391 -1.3918
C  7.0364 -4.6344 -2.2534
C  6.2607 -4.5654 -3.4427
C  4.9168 -4.2418 -3.3780
C  6.4271 -4.2446 -1.0300
C  5.0667 -3.9459 -0.9606
C  4.3110 -3.9846 -2.1311
O  7.2202 -4.0429  0.0562
H  7.8639 -5.3459 -2.2498
H  6.7292 -4.8203 -4.3950
H  4.3183 -4.2273 -4.2882
H  4.6334 -3.6408 -0.0057
H  3.2388 -3.7903 -2.0832
C  8.6157 -3.8999 -0.3335
C  8.6944 -3.4313 -1.7376
C  9.3462 -2.7244 -2.5810
H  9.1426 -2.5089 -3.6273
H  9.1266 -4.8686 -0.2017
H  9.0640 -3.1565  0.3441
56
TS1/2-s    -177.24249  eV ; -177.56463 eV
Au 19.0252  2.1098  0.6900
Au 12.2696 -1.4473  3.3428
Au 12.7671  1.4369 -3.5264
Au 13.4254 -3.1499 -1.2316
Au 14.4396 -0.1210 -1.7459
Au 13.8015  3.9275  2.2133
Au 17.1485 -1.2473  3.8282
Au 14.8187 -2.7020  2.9497
Au 16.5607  3.4192  1.6230
Au 17.1599 -1.2440 -2.8044
Au 15.1206 -4.4472  0.7028
Au 15.8609 -1.7421  0.1011
Au 17.4007  3.6226 -1.0855
Au 14.6164 -2.2293 -3.7093
Au 15.4051  0.2142  2.0496
Au 11.4007  0.8447 -1.0504
Au 10.8011 -2.0408 -0.2885
Au 12.0659 -1.2392 -2.8547
Au 17.8516  1.3854  3.1516
Au 16.1770 -3.7831 -1.8882
Au 13.1556 -0.8500  0.6590
Au 12.4967 -3.5763  1.4718
Au 15.3379  2.3180  3.9988
Au 12.7756  1.3760  3.1373
Au 15.3507  0.4749 -4.3585
Au 12.4991  3.5013 -1.5638
Au 16.6645  0.9345 -0.3906
Au 18.6750 -0.7145  1.4318
Au 10.6409  0.1648  1.6808
Au 15.0961  2.8271 -2.5981
Au 19.2414  0.0290 -1.2822
Au 17.4606 -3.2985  1.8838
Au 11.4709  2.8195  1.0215
Au 17.6253  1.5628 -3.0335
Au 14.8239  4.6442 -0.3534
Au 14.5459 -0.3675  4.6777
Au 14.0690  1.8854  0.2230
Au 18.5071 -2.6682 -0.6811
C  6.2465 -3.2764 -1.5350
C  5.3671 -2.8396 -2.5556
C  5.0255 -3.6802 -3.6068
C  6.7780 -4.5918 -1.6090
C  6.4160 -5.4418 -2.6698
C  5.5356 -4.9906 -3.6482
O  7.6576 -5.0789 -0.6986
H  6.2516 -2.7396 -0.5850
H  4.9537 -1.8311 -2.4952
H  4.3480 -3.3367 -4.3886
H  6.8441 -6.4417 -2.7012
H  5.2194 -5.6695 -4.4396
C  8.4249 -4.1402  0.1019
C  8.9085 -2.9682 -0.6935
C  8.2707 -2.3453 -1.6080
H  8.2285 -1.5961 -2.3833
H  9.2465 -4.7410  0.5032
H  7.8122 -3.7728  0.9429
56
TS2/3-f    -176.82187  eV ; -177.20791 eV
Au 19.0666  1.9958  0.5573
Au 12.3362 -1.3855  3.4343
Au 12.6621  1.4730 -3.4304
Au 13.2363 -3.0963 -1.1503
Au 14.3485 -0.1363 -1.7283
Au 13.9500  3.9270  2.2804
Au 17.1889 -1.2872  3.7397
Au 14.8256 -2.7090  2.9827
Au 16.6849  3.3799  1.5994
Au 17.0109 -1.2903 -2.8944
Au 14.9977 -4.4446  0.6824
Au 15.7679 -1.7502  0.1093
Au 17.3903  3.5666 -1.1573
Au 14.3693 -2.2085 -3.7035
Au 15.4286  0.2439  2.0428
Au 11.3575  0.9689 -0.9226
Au 10.6238 -1.8375 -0.0941
Au 11.8698 -1.1814 -2.7052
Au 17.9666  1.3258  3.0740
Au 15.9600 -3.7703 -1.9288
Au 13.1024 -0.8130  0.7064
Au 12.4593 -3.5336  1.6067
Au 15.5119  2.3168  4.0349
Au 12.8743  1.4432  3.2557
Au 15.1936  0.4730 -4.3577
Au 12.5030  3.5748 -1.4640
Au 16.6377  0.8883 -0.4429
Au 18.6437 -0.8032  1.3049
Au 10.6958  0.2843  1.8195
Au 15.0454  2.8262 -2.5948
Au 19.1952 -0.0456 -1.4068
Au 17.3954 -3.3641  1.7954
Au 11.5493  2.9193  1.1777
Au 17.5321  1.5113 -3.1066
Au 14.8871  4.6367 -0.3040
Au 14.6597 -0.3468  4.6989
Au 14.0832  1.8984  0.2349
Au 18.3572 -2.7187 -0.8162
C  6.8311 -3.1923 -1.8351
C  5.9310 -2.7930 -2.8716
C  5.4362 -3.7224 -3.7649
C  7.1475 -4.5868 -1.6963
C  6.6568 -5.5034 -2.6291
C  5.8120 -5.0780 -3.6561
O  8.0132 -5.0285 -0.7654
H  6.6114 -2.5573 -0.7620
H  5.6713 -1.7358 -2.9609
H  4.7683 -3.4064 -4.5677
H  6.9673 -6.5463 -2.5429
H  5.4648 -5.8013 -4.3962
C  8.4911 -4.0636  0.2378
C  8.7974 -2.7149 -0.3464
C  7.8552 -2.2179 -1.2125
H  7.8324 -1.2064 -1.6128
H  9.3721 -4.5456  0.6716
H  7.7130 -3.9761  1.0206
56
TS2/3-s    -176.83264  eV ; -177.26754 eV  
Au 18.9023  2.1032  1.0580
Au 12.1353 -2.2250  2.0595
Au 13.2269  2.1568 -3.8795
Au 13.9476 -2.7747 -2.5554
Au 14.7302  0.2955 -2.2884
Au 13.4850  3.3433  2.3228
Au 16.9713 -1.9247  3.1192
Au 14.8481 -3.1831  1.6436
Au 16.3376  3.1008  1.9766
Au 17.7136 -0.4146 -3.2442
Au 15.5370 -4.4377 -0.8387
Au 16.1493 -1.6099 -0.7385
Au 17.4310  3.9679 -0.4980
Au 15.3341 -1.2721 -4.6174
Au 15.3996 -0.1437  1.5138
Au 11.6750  0.9089 -1.7388
Au 11.1477 -2.1186 -1.7064
Au 12.6127 -0.6568 -3.9018
Au 17.5860  0.8137  3.1944
Au 16.8076 -3.1366 -3.0508
Au 13.3059 -1.0174 -0.2480
Au 12.7857 -3.9063 -0.1698
Au 14.9198  1.4389  3.8555
Au 12.5136  0.6011  2.4983
Au 15.9456  1.5275 -4.5494
Au 12.6306  3.6769 -1.5672
Au 16.7781  1.1550 -0.5837
Au 18.7498 -0.8095  1.1321
Au 10.5652 -0.3457  0.6061
Au 15.3644  3.4585 -2.4378
Au 19.5218  0.5536 -1.2409
Au 17.6427 -3.4567  0.8347
Au 11.3382  2.4384  0.6582
Au 18.0171  2.4052 -2.8129
Au 14.7209  4.6538  0.1213
Au 14.2250 -1.3478  3.7877
Au 14.0811  1.8024  0.0125
Au 18.9461 -2.2551 -1.3734
C  7.0866 -3.9874 -1.8479
C  6.3844 -3.9911 -3.0769
C  4.9981 -4.0511 -3.0325
C  6.3813 -4.0439 -0.6112
C  4.9964 -4.0994 -0.5788
C  4.3119 -4.0996 -1.8022
O  7.1828 -3.9222  0.4726
H  6.9288 -3.9521 -4.0223
H  4.4316 -4.0324 -3.9626
H  4.4635 -4.0820  0.3727
H  3.2235 -4.1123 -1.8013
C  8.5504 -3.6328  0.0299
C  8.5321 -3.5957 -1.4904
C  9.4871 -3.0929 -2.3332
H  9.3062 -3.2050 -3.4076
H  9.2175 -4.3992  0.4455
H  8.8556 -2.6526  0.4395
H  8.0593 -4.8088 -1.8453
56
TS3/4-f    -177.75485  eV ; -178.09495 eV  
Au 19.1129  2.2817  0.1993
Au 12.3213 -0.8882  3.3143
Au 12.5585  1.8593 -3.4774
Au 13.1082 -2.7103 -1.1640
Au 14.2782  0.2556 -1.8145
Au 14.1150  4.3768  2.0551
Au 17.2107 -0.9363  3.4753
Au 14.7878 -2.3164  2.8330
Au 16.8089  3.7508  1.2919
Au 16.8717 -1.0364 -3.0982
Au 14.8721 -4.1398  0.5871
Au 15.6940 -1.4281 -0.0605
Au 17.4490  3.8708 -1.4732
Au 14.1589 -1.8473 -3.7241
Au 15.4636  0.6278  1.8161
Au 11.2261  1.4932 -0.9473
Au 10.5679 -1.4100 -0.0016
Au 11.7390 -0.7197 -2.6323
Au 18.0539  1.6448  2.7450
Au 15.7784 -3.4854 -2.0574
Au 13.0337 -0.3352  0.6262
Au 12.3818 -3.1236  1.5713
Au 15.6683  2.7215  3.7744
Au 12.9977  1.9059  3.0190
Au 15.0419  0.7816 -4.4879
Au 12.5235  4.0121 -1.6041
Au 16.6455  1.1986 -0.6795
Au 18.5833 -0.5242  0.9781
Au 10.6423  0.8564  1.7814
Au 15.0222  3.1621 -2.7865
Au 19.1409  0.1651 -1.7413
Au 17.3092 -3.0643  1.5878
Au 11.5982  3.4786  1.0701
Au 17.4603  1.7567 -3.3701
Au 14.9806  5.0380 -0.5714
Au 14.7221  0.0750  4.4849
Au 14.1154  2.3398  0.0716
Au 18.2411 -2.5012 -1.0614
C  7.1582 -2.9217 -2.2892
C  6.2861 -2.5654 -3.3320
C  5.7785 -3.5325 -4.1918
C  7.4752 -4.2868 -2.0941
C  7.0005 -5.2583 -2.9816
C  6.1587 -4.8751 -4.0246
O  8.3179 -4.6785 -1.0982
H  7.6732 -1.5991 -0.3822
H  6.0351 -1.5121 -3.4772
H  5.1149 -3.2457 -5.0093
H  7.3086 -6.2962 -2.8423
H  5.8004 -5.6344 -4.7224
C  8.4461 -3.7367  0.0037
C  8.8166 -2.3561 -0.4890
C  7.9719 -1.9503 -1.5653
H  8.1462 -0.9769 -2.0319
H  9.2288 -4.1589  0.6396
H  7.4934 -3.7113  0.5640
56
TS3/4-s    -177.67624  eV ; -178.07788 eV 
Au 18.8655  2.1991  1.0533
Au 12.1640 -2.2986  2.0530
Au 13.2000  2.0917 -3.8589
Au 14.0101 -2.8380 -2.5009
Au 14.7342  0.2721 -2.2667
Au 13.3931  3.3229  2.2679
Au 16.9873 -1.8691  3.1540
Au 14.8948 -3.1979  1.6786
Au 16.2704  3.1623  1.9550
Au 17.7260 -0.3959 -3.2301
Au 15.6211 -4.4832 -0.7773
Au 16.1721 -1.6139 -0.7236
Au 17.3802  4.0377 -0.5136
Au 15.3565 -1.3032 -4.5743
Au 15.3937 -0.1440  1.5158
Au 11.6308  0.8309 -1.7525
Au 11.2366 -2.1909 -1.6765
Au 12.6372 -0.7343 -3.8811
Au 17.5320  0.8941  3.1793
Au 16.8535 -3.1484 -3.0130
Au 13.3311 -1.0625 -0.2241
Au 12.8519 -4.0069 -0.1294
Au 14.8482  1.4623  3.8188
Au 12.4879  0.5408  2.4376
Au 15.9277  1.5129 -4.5318
Au 12.5654  3.6329 -1.5778
Au 16.7602  1.1883 -0.5647
Au 18.6911 -0.7223  1.1133
Au 10.5315 -0.4492  0.5867
Au 15.3107  3.4411 -2.4231
Au 19.5120  0.6286 -1.2398
Au 17.6871 -3.4025  0.8718
Au 11.2623  2.3577  0.6154
Au 17.9746  2.4462 -2.8064
Au 14.6384  4.6657  0.0931
Au 14.2181 -1.3461  3.7917
Au 14.0474  1.7889 -0.0013
Au 18.9802 -2.2083 -1.3612
C  7.0493 -3.7918 -1.8280
C  6.3508 -3.8123 -3.0400
C  4.9642 -3.9397 -3.0011
C  6.3676 -3.9302 -0.6063
C  4.9797 -4.0494 -0.5535
C  4.2937 -4.0519 -1.7714
O  7.1866 -3.8866  0.4849
H  6.8738 -3.7056 -3.9940
H  4.3938 -3.9223 -3.9281
H  4.4594 -4.1162  0.4006
H  3.2067 -4.1124 -1.7625
C  8.5107 -3.5229  0.0235
C  8.4601 -3.5541 -1.4972
C  9.5015 -3.0267 -2.3230
H  9.2685 -3.0598 -3.3950
H  9.2468 -4.2116  0.4636
H  8.7487 -2.4954  0.3621
H  9.2374 -4.3972 -1.9361
73
TS6/7-fs     -272.19193  eV ; -273.62413 eV0
Au 18.7910  2.8755  0.8348
Au 12.3922 -1.6226  2.8742
Au 13.0625  1.6059 -3.8451
Au 13.9217 -2.8129 -1.4728
Au 14.6593  0.0814 -1.9765
Au 13.4146  3.9817  1.9771
Au 17.0974 -0.7428  3.6444
Au 15.1036 -2.6208  2.8671
Au 16.2701  4.0436  1.7213
Au 17.7251 -0.5629 -3.0668
Au 15.6016 -4.1232  0.4477
Au 15.9782 -1.3383  0.0510
Au 17.1021  4.1444 -1.0107
Au 15.2908 -1.7634 -4.0715
Au 15.3613  0.6677  1.8375
Au 11.5364  0.7879 -1.5631
Au 11.1333 -2.1476 -1.0489
Au 12.5663 -1.1609 -3.4057
Au 17.5862  1.9813  3.2016
Au 16.7130 -3.1098 -2.0517
Au 13.1808 -0.6762  0.3549
Au 13.0313 -3.9756  1.5570
Au 14.9055  2.5763  3.8958
Au 12.6085  1.2438  2.6392
Au 15.7663  1.0107 -4.4921
Au 12.3748  3.6031 -1.9320
Au 16.7343  1.3387 -0.5395
Au 18.7448  0.0351  1.4487
Au 10.5253 -0.0966  1.0456
Au 15.1127  3.2659 -2.7764
Au 19.4830  0.9405 -1.2029
Au 17.7677 -2.7251  1.7324
Au 11.3100  2.6744  0.5541
Au 17.8031  2.2992 -3.0357
Au 14.4590  4.9686 -0.4560
Au 14.4042 -0.2556  4.3435
Au 14.0804  2.1493 -0.1461
Au 18.7892 -1.7667 -0.7274
C  8.6609 -5.0348 -3.2737
C  7.8508 -5.1063 -4.4197
C  7.3664 -6.3303 -4.8924
C  8.9747 -6.2409 -2.6045
C  8.4865 -7.4669 -3.0634
C  7.6834 -7.5100 -4.2091
O  9.7053 -6.2327 -1.4482
H  7.6016 -4.1787 -4.9419
H  6.7428 -6.3634 -5.7881
H  8.7485 -8.3715 -2.5125
H  7.3119 -8.4717 -4.5691
C 10.6430 -5.1243 -1.2855
C 10.1363 -3.7951 -1.7688
C  9.1856 -3.7861 -2.7338
H  8.8172 -2.8511 -3.1629
H 11.5842 -5.3786 -1.8131
H 10.8652 -5.1170 -0.2091
C  8.0052 -1.1968  1.8380
C  8.3981 -0.1320  1.2451
H  8.2375 -2.1709  2.2378
C  7.5279  0.9581  0.7064
H  7.2595  1.6365  1.5340
O  6.3159  0.4534  0.0710
H  8.0195  1.5394 -0.0791
C  5.6853 -0.6072  0.6359
C  5.8279 -0.9270  2.0145
C  4.8959 -1.4168 -0.1982
C  4.2572 -2.5408  0.3215
C  4.4059 -2.8812  1.6783
C  5.1669 -2.0736  2.5151
H  5.2753 -2.3211  3.5735
H  3.9235 -3.7770  2.0691
H  3.6280 -3.1485 -0.3286
H  4.8254 -1.1607 -1.2547
H  6.1558 -0.1597  2.7160
73
TS6/7-ss     -272.24654  eV ; -273.60184 eV
Au 24.0229  1.2423 -5.2248
Au 17.3719 -2.3478 -2.5450
Au 17.9177  0.6892 -9.4916
Au 18.6137 -3.8513 -7.1640
Au 19.3738 -1.0607 -7.6588
Au 18.9201  3.0905 -3.6884
Au 22.3062 -2.1090 -2.1572
Au 19.9856 -3.5027 -3.0654
Au 21.7174  2.6579 -4.2236
Au 22.3680 -2.0432 -8.7556
Au 20.2934 -5.2762 -5.2849
Au 21.0362 -2.5654 -5.8465
Au 22.4907  2.8055 -6.9892
Au 19.8745 -3.0674 -9.6735
Au 20.6285 -0.5886 -3.9289
Au 16.6535 -0.0813 -6.9425
Au 15.8916 -2.8541 -6.1668
Au 17.1553 -2.0928 -9.0172
Au 23.0074  0.5544 -2.7020
Au 21.4085 -4.5948 -7.8310
Au 18.2801 -1.7150 -5.1566
Au 17.6835 -4.4752 -4.4505
Au 20.4654  1.4793 -1.9229
Au 17.9346  0.4853 -2.8162
Au 20.5004 -0.3310 -10.1689
Au 17.6344  2.6322 -7.4569
Au 21.6977  0.0753 -6.4942
Au 23.8845 -1.5551 -4.4665
Au 15.7110 -0.6813 -4.1720
Au 20.2349  2.0682 -8.5621
Au 24.3611 -0.7537 -7.1841
Au 22.6633 -4.1686 -4.0926
Au 16.5985  1.9229 -4.8892
Au 22.8161  0.8153 -9.0066
Au 19.9487  3.7940 -6.2336
Au 19.6985 -1.2272 -1.3131
Au 19.1980  1.0275 -5.6853
Au 23.7263 -3.4597 -6.6182
C 11.8164 -4.1757 -7.2462
C 10.4746 -3.7714 -7.1431
C  9.4335 -4.5631 -7.6401
C 12.0909 -5.4200 -7.8631
C 11.0580 -6.2097 -8.3769
C  9.7302 -5.7823 -8.2610
O 13.3748 -5.8474 -8.0476
H 10.2566 -2.8098 -6.6708
H  8.3983 -4.2298 -7.5433
H 11.3144 -7.1534 -8.8616
H  8.9256 -6.4106 -8.6496
C 14.3819 -5.3119 -7.1307
C 14.1949 -3.8690 -6.7553
C 12.9420 -3.3591 -6.8035
H 12.7323 -2.3282 -6.5074
H 15.3315 -5.4766 -7.6532
H 14.3862 -5.9389 -6.2175
C 13.7023 -3.2506 -12.1999
C 13.3321 -4.4438 -12.8792
C 12.1384 -5.0876 -12.5947
C 12.7938 -2.7254 -11.2331
C 11.5780 -3.3724 -10.9627
C 11.2456 -4.5300 -11.6586
O 13.0796 -1.6177 -10.5056
H 14.3946 -2.5681 -12.6966
H 14.0140 -4.8519 -13.6280
H 11.8845 -6.0211 -13.0960
H 10.9253 -2.9733 -10.1864
H 10.2957 -5.0233 -11.4507
C 14.4712 -1.2029 -10.3866
C 15.4259 -2.3424 -10.2451
C 15.3629 -3.4749 -10.8448
H 15.7597 -4.4657 -10.9767
H 14.4786 -0.5433 -9.5132
H 14.7446 -0.6019 -11.2721
72
TS8-fs       -271.50343  eV ; -275.36255 eV 
Au 18.7106  2.6485  0.8914
Au 12.1471 -1.7143  2.6280
Au 12.7511  1.7993 -3.6834
Au 13.6160 -2.8345 -1.5843
Au 14.5008  0.2855 -1.9905
Au 13.2112  3.9085  2.0443
Au 16.8033 -1.0922  3.5969
Au 14.7808 -2.9949  2.8164
Au 16.1669  3.8643  1.8101
Au 17.4834 -0.6624 -3.2317
Au 15.3360 -4.2047  0.2259
Au 15.8491 -1.3950 -0.1631
Au 17.0882  4.1128 -0.9294
Au 14.8096 -1.6501 -3.9680
Au 15.1862  0.4271  1.7946
Au 10.6554  1.3753 -1.8588
Au 10.9727 -2.3572 -0.6401
Au 12.0896 -0.8415 -2.8970
Au 17.3843  1.7043  3.2003
Au 16.4449 -3.2153 -2.2899
Au 13.0489 -0.6199  0.2098
Au 12.6889 -3.9253  1.0605
Au 14.7034  2.3368  3.8328
Au 12.3886  1.1311  2.5104
Au 15.4849  1.0809 -4.4957
Au 12.2559  3.8501 -1.7514
Au 16.5411  1.3726 -0.4466
Au 18.3561 -0.2523  1.3324
Au 10.2974  0.0360  0.7611
Au 14.9563  3.2580 -2.5956
Au 19.2187  0.7209 -1.2295
Au 17.4192 -2.9666  1.5973
Au 11.0495  2.7424  0.5856
Au 17.6029  2.1837 -3.0045
Au 14.4649  4.9549 -0.2776
Au 14.1063 -0.5108  4.2242
Au 13.8204  2.1449 -0.0508
Au 18.5761 -2.0035 -0.9214
C  7.6993 -3.5667 -2.4240
C  7.6133 -3.7630 -3.8157
C  7.0916 -4.9450 -4.3488
C  7.2044 -4.5918 -1.5752
C  6.6642 -5.7646 -2.1035
C  6.6229 -5.9481 -3.4908
O  7.2325 -4.4247 -0.2178
H  8.0004 -2.9895 -4.4822
H  7.0670 -5.0954 -5.4294
H  6.3208 -6.5395 -1.4156
H  6.2410 -6.8868 -3.9024
C  8.4581 -3.7763  0.2532
C  8.8506 -2.5534 -0.5234
C  8.3767 -2.4429 -1.8140
H  8.6293 -1.5726 -2.4314
H  9.2759 -4.5197  0.2183
H  8.2577 -3.5426  1.3044
C  7.7827 -1.1335  1.8061
C  8.2961 -0.6741  0.6142
H  8.3879 -1.7478  2.4804
C  7.4015  0.2313 -0.1827
H  7.5629  1.2714  0.1608
O  5.9757 -0.0712 -0.0349
H  7.5974  0.1992 -1.2599
C  5.6002 -0.1263  1.2817
C  6.4764 -0.7004  2.2441
C  4.3485  0.3654  1.6507
C  3.9472  0.3213  2.9939
C  4.7878 -0.2497  3.9595
C  6.0324 -0.7633  3.5841
H  6.6935 -1.1938  4.3394
H  4.4831 -0.2692  5.0082
H  2.9870  0.7517  3.2874
H  3.7148  0.8093  0.8822
72
TS8-ss       -271.40144  eV ; -275.25192 eV
Au 23.6994  1.5335 -5.1170
Au 16.9460 -1.9841 -2.4895
Au 17.6083  0.8548 -9.4926
Au 18.2854 -3.6180 -7.0658
Au 19.0166 -0.7966 -7.6302
Au 18.5458  3.4491 -3.7491
Au 21.7857 -1.7365 -1.9640
Au 19.4866 -3.3753 -2.6282
Au 21.3793  3.0201 -4.2069
Au 22.1756 -1.9328 -8.8538
Au 19.8541 -4.9114 -5.0274
Au 20.6262 -2.2524 -5.7292
Au 22.1948  3.0178 -6.9619
Au 19.5136 -2.8325 -9.5858
Au 20.2029 -0.2413 -3.8502
Au 16.2180  0.3214 -7.0128
Au 15.6889 -2.6111 -6.3481
Au 16.7626 -1.8327 -9.0161
Au 22.5612  0.8984 -2.6268
Au 21.0045 -4.3038 -7.6824
Au 17.9290 -1.3787 -5.1103
Au 17.2427 -4.0822 -4.3420
Au 20.0119  1.8540 -1.9146
Au 17.5562  0.8163 -2.9339
Au 20.2606 -0.1820 -10.1409
Au 17.3094  2.9726 -7.5655
Au 21.3439  0.3453 -6.4127
Au 23.3227 -1.2304 -4.3613
Au 15.3727 -0.4110 -4.3555
Au 19.9297  2.1117 -8.4255
Au 24.0005 -0.5443 -7.0700
Au 22.1357 -3.8051 -3.8436
Au 16.1966  2.3276 -4.9462
Au 22.5476  0.9457 -8.9521
Au 19.6277  4.0778 -6.2910
Au 19.1998 -0.8642 -1.2267
Au 18.8017  1.3373 -5.7101
Au 23.2620 -3.1988 -6.4577
C 11.9609 -3.7911 -7.0152
C 10.6686 -3.3420 -6.6632
C  9.6390 -4.2381 -6.3829
C 12.1960 -5.1901 -7.0275
C 11.1654 -6.0941 -6.7447
C  9.8845 -5.6186 -6.4346
O 13.4493 -5.6765 -7.2414
H 10.4911 -2.2649 -6.6114
H  8.6414 -3.8687 -6.1217
H 11.3836 -7.1630 -6.7651
H  9.0745 -6.3290 -6.2468
C 14.3388 -4.8583 -8.0716
C 14.2699 -3.3613 -7.8290
C 13.0572 -2.9059 -7.3131
H 12.8968 -1.8416 -7.1281
H 14.0812 -5.0595 -9.1249
H 15.3364 -5.2618 -7.8574
C 13.6367 -3.2043 -11.6605
C 13.5502 -3.9938 -12.8361
C 12.4627 -3.8935 -13.7105
C 12.5782 -2.2783 -11.4247
C 11.4903 -2.1804 -12.2954
C 11.4263 -2.9904 -13.4370
O 12.5759 -1.5042 -10.3000
H 14.3501 -4.7077 -13.0466
H 12.4199 -4.5219 -14.6047
H 10.7040 -1.4597 -12.0626
H 10.5648 -2.9170 -14.1060
C 13.9044 -1.2206 -9.7518
C 14.7809 -2.4409 -9.5917
C 14.6766 -3.3330 -10.6705
H 15.3956 -4.1478 -10.8019
H 13.7128 -0.7164 -8.8008
H 14.4028 -0.4957 -10.4225
18
2H-chromene         -94.32687   eV ; -94.51555  eV
C  7.7932 -2.7021 -1.8150
C  7.2098 -2.3128 -3.0312
C  7.0060 -3.2349 -4.0581
C  8.1663 -4.0558 -1.6506
C  7.9887 -4.9784 -2.6820
C  7.4045 -4.5648 -3.8824
O  8.7955 -4.4866 -0.5086
H  8.7412 -1.5934  1.2968
H  6.9244 -1.2671 -3.1653
H  6.5486 -2.9172 -4.9951
H  8.3058 -6.0096 -2.5272
H  7.2571 -5.2885 -4.6848
C  8.5185 -3.7326  0.6953
C  8.4856 -2.2523  0.4655
C  8.1042 -1.7786 -0.7341
H  8.0422 -0.7061 -0.9267
H  9.3145 -4.0215  1.3942
H  7.5571 -4.0871  1.1187
18
benzofuran        -94.28885   eV ; -94.28885  eV
C  7.4161 -3.2903 -1.8333
C  6.7849 -2.7556 -2.9611
C  5.4430 -2.3767 -2.8705
C  6.6934 -3.4328 -0.6368
C  5.3543 -3.0632 -0.5251
C  4.7404 -2.5317 -1.6642
O  7.4312 -3.9660  0.3836
H  7.3334 -2.6330 -3.8967
H  4.9389 -1.9526 -3.7394
H  4.8186 -3.1877  0.4157
H  3.6933 -2.2303 -1.6122
C  8.7796 -4.1871 -0.1280
C  8.7700 -3.7809 -1.5901
C  9.8078 -3.8780 -2.4393
H  9.7189 -3.5634 -3.4795
H  9.0243 -5.2477  0.0221
H  9.4661 -3.5741  0.4751
H 10.7716 -4.2768 -2.1211
34
Prd       -183.99237  eV ; -184.31812 eV
C  7.6677 -3.8600 -2.6213
C  8.0370 -3.7939 -3.9775
C  8.3961 -4.9407 -4.6819
C  7.6791 -5.1228 -1.9843
C  8.0121 -6.2789 -2.6892
C  8.3755 -6.1840 -4.0352
O  7.2717 -5.2477 -0.6828
H  8.0276 -2.8220 -4.4749
H  8.6840 -4.8733 -5.7311
H  7.9863 -7.2384 -2.1727
H  8.6480 -7.0880 -4.5808
C  7.4452 -4.0816  0.1507
C  7.0247 -2.7894 -0.5152
C  7.1972 -2.7214 -1.8678
H  6.9823 -1.8078 -2.4245
H  8.5054 -4.0248  0.4652
H  6.8367 -4.2963  1.0366
C  6.5691 -1.6955  1.6674
C  6.5836 -1.6818  0.3029
H  6.8712 -2.5781  2.2321
C  6.2290 -0.3704 -0.3631
H  7.1446  0.2278 -0.5400
O  5.2887  0.4286  0.3849
H  5.7340 -0.5291 -1.3273
C  5.5004  0.5105  1.7356
C  6.1489 -0.5388  2.4244
C  4.9786  1.6084  2.4201
C  5.1289  1.6866  3.8072
C  5.7874  0.6700  4.5100
C  6.2820 -0.4360  3.8215
H  6.7783 -1.2453  4.3613
H  5.9030  0.7368  5.5922
H  4.7317  2.5506  4.3412
H  4.4674  2.3873  1.8547
3
h2o     -10.35129   eV ; -10.61147  eV
O -4.1504  1.6476  0.0159
H -4.4267  2.3051  0.6734
H -3.1814  1.6825  0.0508
2
o2  triplet       -6.77594    eV ; -6.77906   eV
O -8.3808  1.1841  0.0000
O -9.4120  0.5235  0.0000
39
au38O    -89.09183 eV  ;  -89.22129 eV
Au  3.6973  2.0798  1.4701
Au -3.0071 -2.1308  2.5549
Au -1.7258  1.8167 -3.7091
Au -1.1382 -3.0086 -2.1080
Au -0.3759 -0.0162 -1.9801
Au -1.7175  3.3482  2.4517
Au  1.7182 -1.8106  3.7460
Au -0.3529 -3.3171  2.4095
Au  1.1608  3.2057  2.2892
Au  3.0806 -0.6495 -3.0704
Au  0.4392 -4.5453 -0.1626
Au  0.9672 -1.7425 -0.2357
Au  2.3228  3.8238 -0.2921
Au  0.2110 -1.6757 -4.2813
Au  0.3658 -0.0386  1.9591
Au -3.6198  0.8362 -1.7670
Au -3.7123 -1.9793 -1.4528
Au -2.3903 -0.9489 -3.7750
Au  2.3377  0.9928  3.7210
Au  1.6770 -3.5519 -2.3955
Au -1.6974 -1.0043  0.3130
Au -2.2727 -3.7913  0.3782
Au -0.3749  1.6397  4.1844
Au -2.7387  0.7219  2.8682
Au  0.9932  1.0950 -4.1566
Au -2.4306  3.4594 -1.5522
Au  1.6816  1.0061 -0.3067
Au  3.4313 -0.7376  1.6653
Au -4.4045 -0.3637  0.7744
Au  0.3727  3.1468 -2.2460
Au  4.4279  0.4292 -0.7948
Au  2.4062 -3.4268  1.5610
Au -3.7416  2.3891  0.7214
Au  3.0675  2.1419 -2.5307
Au -0.4029  4.4712  0.2119
Au -0.9804 -1.1249  4.2545
Au -1.0013  1.7073  0.1894
Au  3.6663 -2.2985 -0.7331
O  2.2704 -2.3587 -4.1117
39
au38O(-2)  -93.30509  eV  ; -97.24229  eV
Au  3.6879  2.1110  1.4865
Au -2.9070 -2.1423  2.5416
Au -1.7758  1.8248 -3.7439
Au -1.1263 -2.9340 -2.0451
Au -0.3922  0.0000 -1.9892
Au -1.6970  3.3677  2.4630
Au  1.7001 -1.8473  3.7262
Au -0.3304 -3.5287  2.5629
Au  1.2201  3.3636  2.3952
Au  3.1209 -0.6484 -3.1078
Au  0.4940 -4.6111 -0.1216
Au  0.9694 -1.7521 -0.2225
Au  2.3298  3.8384 -0.2653
Au  0.1804 -1.6648 -4.2833
Au  0.3395 -0.0551  1.9614
Au -3.8159  0.9158 -1.8916
Au -3.7088 -1.9045 -1.5144
Au -2.4306 -0.9055 -3.8443
Au  2.3172  1.0024  3.6982
Au  1.6699 -3.5626 -2.3731
Au -1.6839 -1.0268  0.2758
Au -2.1789 -3.8284  0.4168
Au -0.3633  1.6627  4.1904
Au -2.6553  0.7062  2.7869
Au  1.0086  1.0928 -4.1557
Au -2.4403  3.4261 -1.5809
Au  1.6726  1.0059 -0.2999
Au  3.3093 -0.7202  1.6113
Au -4.3616 -0.3161  0.7155
Au  0.3556  3.0362 -2.1744
Au  4.4419  0.4366 -0.8037
Au  2.4024 -3.4765  1.5974
Au -3.7611  2.4379  0.7055
Au  3.0903  2.1456 -2.5378
Au -0.3908  4.4527  0.2265
Au -0.9588 -1.1376  4.3036
Au -1.0198  1.6943  0.1960
Au  3.6673 -2.2892 -0.7400
O  2.2304 -2.3805 -4.1083
57
IM1-O     -181.66612 eV  ; -181.96886 eV 
Au  3.6970  2.0800  1.4700
Au -3.0070 -2.1310  2.5550
Au -1.7260  1.8170 -3.7090
Au -1.1380 -3.0090 -2.1080
Au -0.3760 -0.0160 -1.9800
Au -1.7170  3.3480  2.4520
Au  1.7180 -1.8110  3.7460
Au -0.3530 -3.3170  2.4090
Au  1.1610  3.2060  2.2890
Au  3.0810 -0.6500 -3.0700
Au  0.4390 -4.5450 -0.1630
Au  0.9670 -1.7420 -0.2360
Au  2.3230  3.8240 -0.2920
Au  0.2110 -1.6760 -4.2810
Au  0.3660 -0.0390  1.9590
Au -3.6200  0.8360 -1.7670
Au -3.7120 -1.9790 -1.4530
Au -2.3900 -0.9490 -3.7750
Au  2.3380  0.9930  3.7210
Au  1.6770 -3.5520 -2.3950
Au -1.6970 -1.0040  0.3130
Au -2.2730 -3.7910  0.3780
Au -0.3750  1.6400  4.1840
Au -2.7390  0.7220  2.8680
Au  0.9930  1.0950 -4.1570
Au -2.4310  3.4590 -1.5520
Au  1.6820  1.0060 -0.3070
Au  3.4310 -0.7380  1.6650
Au -4.4050 -0.3640  0.7740
Au  0.3730  3.1470 -2.2460
Au  4.4280  0.4290 -0.7950
Au  2.4060 -3.4270  1.5610
Au -3.7420  2.3890  0.7210
Au  3.0680  2.1420 -2.5310
Au -0.4030  4.4710  0.2120
Au -0.9800 -1.1250  4.2540
Au -1.0010  1.7070  0.1890
Au  3.6660 -2.2980 -0.7330
O  2.2700 -2.3590 -4.1120
C  4.1850 -7.8280 -3.9028
C  4.7905 -9.0367 -3.5369
C  4.4798 -10.2258 -4.1994
C  3.2575 -7.8157 -4.9526
C  2.9379 -9.0062 -5.6208
C  3.5505 -10.2012 -5.2465
O  2.6101 -6.6910 -5.4203
H  4.4399 -6.9194 -3.3592
H  5.5099 -9.0380 -2.7164
H  4.9525 -11.1629 -3.9015
H  2.2094 -8.9716 -6.4317
H  3.2930 -11.1208 -5.7750
C  2.7170 -5.4796 -4.6697
C  2.0402 -5.5779 -3.3563
C  1.5039 -6.1993 -2.4215
H  1.0901 -6.8928 -1.7137
H  2.2426 -4.7014 -5.2797
H  3.7676 -5.1780 -4.5244
57
IM2-O     -181.61725 eV  ; -182.02627 eV
Au  3.6970  2.0800  1.4700
Au -3.0070 -2.1310  2.5550
Au -1.7260  1.8170 -3.7090
Au -1.1380 -3.0090 -2.1080
Au -0.3760 -0.0160 -1.9800
Au -1.7170  3.3480  2.4520
Au  1.7180 -1.8110  3.7460
Au -0.3530 -3.3170  2.4090
Au  1.1610  3.2060  2.2890
Au  3.0810 -0.6500 -3.0700
Au  0.4390 -4.5450 -0.1630
Au  0.9670 -1.7420 -0.2360
Au  2.3230  3.8240 -0.2920
Au  0.2110 -1.6760 -4.2810
Au  0.3660 -0.0390  1.9590
Au -3.6200  0.8360 -1.7670
Au -3.7120 -1.9790 -1.4530
Au -2.3900 -0.9490 -3.7750
Au  2.3380  0.9930  3.7210
Au  1.6770 -3.5520 -2.3950
Au -1.6970 -1.0040  0.3130
Au -2.2730 -3.7910  0.3780
Au -0.3750  1.6400  4.1840
Au -2.7390  0.7220  2.8680
Au  0.9930  1.0950 -4.1570
Au -2.4310  3.4590 -1.5520
Au  1.6820  1.0060 -0.3070
Au  3.4310 -0.7380  1.6650
Au -4.4050 -0.3640  0.7740
Au  0.3730  3.1470 -2.2460
Au  4.4280  0.4290 -0.7950
Au  2.4060 -3.4270  1.5610
Au -3.7420  2.3890  0.7210
Au  3.0680  2.1420 -2.5310
Au -0.4030  4.4710  0.2120
Au -0.9800 -1.1250  4.2540
Au -1.0010  1.7070  0.1890
Au  3.6660 -2.2980 -0.7330
O  2.2700 -2.3590 -4.1120
C  3.8027 -7.3853 -3.4621
C  4.2521 -8.5833 -2.7120
C  3.8406 -9.8429 -3.0434
C  2.8902 -7.6904 -4.5959
C  2.4953 -8.9917 -4.9111
C  2.9724 -10.0564 -4.1513
O  2.3893 -6.6798 -5.2952
H  4.6934 -6.8496 -3.8599
H  4.9251 -8.4182 -1.8684
H  4.1815 -10.6996 -2.4598
H  1.8016 -9.1439 -5.7387
H  2.6605 -11.0716 -4.3992
C  2.5603 -5.3165 -4.7415
C  2.4984 -5.2918 -3.2490
C  3.0759 -6.2977 -2.5923
H  3.0914 -6.4328 -1.5125
H  1.7805 -4.7310 -5.2354
H  3.5383 -4.9418 -5.0896
57
IM3-O     -182.72431 eV  ; -183.02632 eV 
Au  3.6970  2.0800  1.4700
Au -3.0070 -2.1310  2.5550
Au -1.7260  1.8170 -3.7090
Au -1.1380 -3.0090 -2.1080
Au -0.3760 -0.0160 -1.9800
Au -1.7170  3.3480  2.4520
Au  1.7180 -1.8110  3.7460
Au -0.3530 -3.3170  2.4090
Au  1.1610  3.2060  2.2890
Au  3.0810 -0.6500 -3.0700
Au  0.4390 -4.5450 -0.1630
Au  0.9670 -1.7420 -0.2360
Au  2.3230  3.8240 -0.2920
Au  0.2110 -1.6760 -4.2810
Au  0.3660 -0.0390  1.9590
Au -3.6200  0.8360 -1.7670
Au -3.7120 -1.9790 -1.4530
Au -2.3900 -0.9490 -3.7750
Au  2.3380  0.9930  3.7210
Au  1.6770 -3.5520 -2.3950
Au -1.6970 -1.0040  0.3130
Au -2.2730 -3.7910  0.3780
Au -0.3750  1.6400  4.1840
Au -2.7390  0.7220  2.8680
Au  0.9930  1.0950 -4.1570
Au -2.4310  3.4590 -1.5520
Au  1.6820  1.0060 -0.3070
Au  3.4310 -0.7380  1.6650
Au -4.4050 -0.3640  0.7740
Au  0.3730  3.1470 -2.2460
Au  4.4280  0.4290 -0.7950
Au  2.4060 -3.4270  1.5610
Au -3.7420  2.3890  0.7210
Au  3.0680  2.1420 -2.5310
Au -0.4030  4.4710  0.2120
Au -0.9800 -1.1250  4.2540
Au -1.0010  1.7070  0.1890
Au  3.6660 -2.2980 -0.7330
O  2.2700 -2.3590 -4.1120
C  3.6054 -6.8441 -2.3399
C  4.9531 -7.2213 -2.2602
C  5.6031 -7.8289 -3.3357
C  2.9077 -7.1023 -3.5329
C  3.5563 -7.6950 -4.6259
C  4.8979 -8.0562 -4.5242
O  1.5836 -6.7776 -3.7066
H  3.5694 -5.4023 -0.7229
H  5.4974 -7.0269 -1.3326
H  6.6535 -8.1119 -3.2524
H  2.9874 -7.8646 -5.5410
H  5.3947 -8.5199 -5.3784
C  0.8402 -6.5182 -2.4850
C  1.5764 -5.5756 -1.5706
C  2.9108 -6.1611 -1.1756
H  2.7319 -6.9142 -0.3835
H  0.6825 -7.4843 -1.9674
H -0.1287 -6.1351 -2.8216
57
IM4-O      -183.46783 eV  ; -183.78572 eV
Au  3.6970  2.0800  1.4700
Au -3.0070 -2.1310  2.5550
Au -1.7260  1.8170 -3.7090
Au -1.1380 -3.0090 -2.1080
Au -0.3760 -0.0160 -1.9800
Au -1.7170  3.3480  2.4520
Au  1.7180 -1.8110  3.7460
Au -0.3530 -3.3170  2.4090
Au  1.1610  3.2060  2.2890
Au  3.0810 -0.6500 -3.0700
Au  0.4390 -4.5450 -0.1630
Au  0.9670 -1.7420 -0.2360
Au  2.3230  3.8240 -0.2920
Au  0.2110 -1.6760 -4.2810
Au  0.3660 -0.0390  1.9590
Au -3.6200  0.8360 -1.7670
Au -3.7120 -1.9790 -1.4530
Au -2.3900 -0.9490 -3.7750
Au  2.3380  0.9930  3.7210
Au  1.6770 -3.5520 -2.3950
Au -1.6970 -1.0040  0.3130
Au -2.2730 -3.7910  0.3780
Au -0.3750  1.6400  4.1840
Au -2.7390  0.7220  2.8680
Au  0.9930  1.0950 -4.1570
Au -2.4310  3.4590 -1.5520
Au  1.6820  1.0060 -0.3070
Au  3.4310 -0.7380  1.6650
Au -4.4050 -0.3640  0.7740
Au  0.3730  3.1470 -2.2460
Au  4.4280  0.4290 -0.7950
Au  2.4060 -3.4270  1.5610
Au -3.7420  2.3890  0.7210
Au  3.0680  2.1420 -2.5310
Au -0.4030  4.4710  0.2120
Au -0.9800 -1.1250  4.2540
Au -1.0010  1.7070  0.1890
Au  3.6660 -2.2980 -0.7330
O  2.2700 -2.3590 -4.1120
C  3.5751 -7.6167 -2.3182
C  4.9378 -7.9374 -2.1899
C  5.7425 -8.1152 -3.3147
C  3.0379 -7.4655 -3.6194
C  3.8440 -7.6185 -4.7490
C  5.1921 -7.9508 -4.5934
O  1.7343 -7.0752 -3.7996
H  3.1267 -7.2712 -0.1925
H  5.3604 -8.0492 -1.1886
H  6.7959 -8.3743 -3.1990
H  3.4001 -7.4735 -5.7349
H  5.8156 -8.0931 -5.4776
C  0.8119 -7.5006 -2.7679
C  1.3587 -7.3007 -1.3872
C  2.6944 -7.3797 -1.1891
H  0.6538 -7.2010 -0.5556
H  0.5664 -8.5688 -2.9366
H -0.0955 -6.9084 -2.9401
56
IM5-O     -183.68544 eV  ; -184.83143 eV
Au  3.6970  2.0800  1.4700
Au -3.0070 -2.1310  2.5550
Au -1.7260  1.8170 -3.7090
Au -1.1380 -3.0090 -2.1080
Au -0.3760 -0.0160 -1.9800
Au -1.7170  3.3480  2.4520
Au  1.7180 -1.8110  3.7460
Au -0.3530 -3.3170  2.4090
Au  1.1610  3.2060  2.2890
Au  3.0810 -0.6500 -3.0700
Au  0.4390 -4.5450 -0.1630
Au  0.9670 -1.7420 -0.2360
Au  2.3230  3.8240 -0.2920
Au  0.2110 -1.6760 -4.2810
Au  0.3660 -0.0390  1.9590
Au -3.6200  0.8360 -1.7670
Au -3.7120 -1.9790 -1.4530
Au -2.3900 -0.9490 -3.7750
Au  2.3380  0.9930  3.7210
Au  1.6770 -3.5520 -2.3950
Au -1.6970 -1.0040  0.3130
Au -2.2730 -3.7910  0.3780
Au -0.3750  1.6400  4.1840
Au -2.7390  0.7220  2.8680
Au  0.9930  1.0950 -4.1570
Au -2.4310  3.4590 -1.5520
Au  1.6820  1.0060 -0.3070
Au  3.4310 -0.7380  1.6650
Au -4.4050 -0.3640  0.7740
Au  0.3730  3.1470 -2.2460
Au  4.4280  0.4290 -0.7950
Au  2.4060 -3.4270  1.5610
Au -3.7420  2.3890  0.7210
Au  3.0680  2.1420 -2.5310
Au -0.4030  4.4710  0.2120
Au -0.9800 -1.1250  4.2540
Au -1.0010  1.7070  0.1890
Au  3.6660 -2.2980 -0.7330
O  2.2700 -2.3590 -4.1120
C  3.7388 -7.4207 -3.0578
C  4.5303 -8.3614 -2.3798
C  5.0433 -9.4866 -3.0318
C  3.4879 -7.6242 -4.4351
C  3.9884 -8.7527 -5.0916
C  4.7710 -9.6773 -4.3915
O  2.6786 -6.7797 -5.1390
H  4.7255 -8.2078 -1.3151
H  5.6526 -10.2087 -2.4843
H  3.7515 -8.8917 -6.1481
H  5.1626 -10.5528 -4.9132
C  2.5367 -5.4163 -4.6273
C  2.5029 -5.3180 -3.1313
C  3.1000 -6.2853 -2.4014
H  3.1330 -6.2410 -1.3105
H  1.6089 -5.0547 -5.0856
H  3.3623 -4.7968 -5.0247
74
IM6-O-d+0    -276.49724 eV  ; -277.79093 eV
Au  3.6970  2.0800  1.4700
Au -3.0070 -2.1310  2.5550
Au -1.7260  1.8170 -3.7090
Au -1.1380 -3.0090 -2.1080
Au -0.3760 -0.0160 -1.9800
Au -1.7170  3.3480  2.4520
Au  1.7180 -1.8110  3.7460
Au -0.3530 -3.3170  2.4090
Au  1.1610  3.2060  2.2890
Au  3.0810 -0.6500 -3.0700
Au  0.4390 -4.5450 -0.1630
Au  0.9670 -1.7420 -0.2360
Au  2.3230  3.8240 -0.2920
Au  0.2110 -1.6760 -4.2810
Au  0.3660 -0.0390  1.9590
Au -3.6200  0.8360 -1.7670
Au -3.7120 -1.9790 -1.4530
Au -2.3900 -0.9490 -3.7750
Au  2.3380  0.9930  3.7210
Au  1.6770 -3.5520 -2.3950
Au -1.6970 -1.0040  0.3130
Au -2.2730 -3.7910  0.3780
Au -0.3750  1.6400  4.1840
Au -2.7390  0.7220  2.8680
Au  0.9930  1.0950 -4.1570
Au -2.4310  3.4590 -1.5520
Au  1.6820  1.0060 -0.3070
Au  3.4310 -0.7380  1.6650
Au -4.4050 -0.3640  0.7740
Au  0.3730  3.1470 -2.2460
Au  4.4280  0.4290 -0.7950
Au  2.4060 -3.4270  1.5610
Au -3.7420  2.3890  0.7210
Au  3.0680  2.1420 -2.5310
Au -0.4030  4.4710  0.2120
Au -0.9800 -1.1250  4.2540
Au -1.0010  1.7070  0.1890
Au  3.6660 -2.2980 -0.7330
O  2.2700 -2.3590 -4.1120
C  3.0477 -7.6994 -3.2547
C  3.2326 -8.9462 -2.6352
C  3.7093 -10.0492 -3.3490
C  3.3468 -7.5840 -4.6326
C  3.8396 -8.6789 -5.3492
C  4.0164 -9.9084 -4.7080
O  3.2476 -6.3851 -5.2785
H  3.0060 -9.0382 -1.5699
H  3.8513 -11.0082 -2.8482
H  4.0795 -8.5465 -6.4055
H  4.3932 -10.7609 -5.2772
C  2.3037 -5.4159 -4.7202
C  2.2696 -5.3828 -3.2198
C  2.6141 -6.5017 -2.5405
H  2.5668 -6.5482 -1.4497
H  1.2933 -5.6487 -5.1105
H  2.6162 -4.4493 -5.1334
C  7.3162 -1.5558 -3.5638
C  7.4973 -1.2882 -4.9265
C  8.6818 -1.6396 -5.5764
C  8.3428 -2.1846 -2.8482
C  9.5343 -2.5467 -3.4933
C  9.6988 -2.2727 -4.8508
O  8.2962 -2.4881 -1.4991
H  6.6869 -0.8059 -5.4753
H  8.8083 -1.4309 -6.6397
H 10.3151 -3.0406 -2.9133
H 10.6292 -2.5612 -5.3448
C  7.0980 -2.1627 -0.7827
C  5.9846 -3.0553 -1.1238
C  5.2215 -3.9182 -1.5625
H  4.6742 -4.7335 -2.0102
H  6.8025 -1.1095 -0.9454
H  7.3565 -2.2745  0.2790
H  6.3702 -1.2801 -3.0959
74
IM6-O-d+d+    -276.27797 eV  ; -277.55887 eV
Au  3.6970  2.0800  1.4700
Au -3.0070 -2.1310  2.5550
Au -1.7260  1.8170 -3.7090
Au -1.1380 -3.0090 -2.1080
Au -0.3760 -0.0160 -1.9800
Au -1.7170  3.3480  2.4520
Au  1.7180 -1.8110  3.7460
Au -0.3530 -3.3170  2.4090
Au  1.1610  3.2060  2.2890
Au  3.0810 -0.6500 -3.0700
Au  0.4390 -4.5450 -0.1630
Au  0.9670 -1.7420 -0.2360
Au  2.3230  3.8240 -0.2920
Au  0.2110 -1.6760 -4.2810
Au  0.3660 -0.0390  1.9590
Au -3.6200  0.8360 -1.7670
Au -3.7120 -1.9790 -1.4530
Au -2.3900 -0.9490 -3.7750
Au  2.3380  0.9930  3.7210
Au  1.6770 -3.5520 -2.3950
Au -1.6970 -1.0040  0.3130
Au -2.2730 -3.7910  0.3780
Au -0.3750  1.6400  4.1840
Au -2.7390  0.7220  2.8680
Au  0.9930  1.0950 -4.1570
Au -2.4310  3.4590 -1.5520
Au  1.6820  1.0060 -0.3070
Au  3.4310 -0.7380  1.6650
Au -4.4050 -0.3640  0.7740
Au  0.3730  3.1470 -2.2460
Au  4.4280  0.4290 -0.7950
Au  2.4060 -3.4270  1.5610
Au -3.7420  2.3890  0.7210
Au  3.0680  2.1420 -2.5310
Au -0.4030  4.4710  0.2120
Au -0.9800 -1.1250  4.2540
Au -1.0010  1.7070  0.1890
Au  3.6660 -2.2980 -0.7330
O  2.2700 -2.3590 -4.1120
C  3.9628 -6.4818 -4.7298
C  4.5956 -6.5493 -5.9813
C  5.2011 -7.7279 -6.4272
C  3.9449 -7.6444 -3.9233
C  4.5582 -8.8237 -4.3575
C  5.1839 -8.8632 -5.6083
O  3.4044 -7.6284 -2.6695
H  4.6156 -5.6513 -6.6043
H  5.6862 -7.7574 -7.4045
H  4.5399 -9.6953 -3.7007
H  5.6548 -9.7904 -5.9429
C  2.4039 -6.5979 -2.3709
C  2.6158 -5.2920 -3.0763
C  3.3628 -5.2644 -4.2001
H  3.5149 -4.3258 -4.7387
H  2.4577 -6.4823 -1.2814
H  1.4049 -7.0060 -2.6195
C  0.7420 -0.2047 -8.9663
C  0.3865  0.7485 -9.9276
C  0.3966  0.4397 -11.2891
C  1.1219 -1.4901 -9.3807
C  1.1250 -1.8107 -10.7480
C  0.7674 -0.8504 -11.6917
O  1.5055 -2.5085 -8.5398
H  0.0889  1.7446 -9.5943
H  0.1134  1.1897 -12.0288
H  1.4172 -2.8200 -11.0426
H  0.7856 -1.1112 -12.7522
C  1.4744 -2.2648 -7.1246
C  0.0998 -2.2051 -6.5963
C -1.1327 -2.2482 -6.5853
H -2.2049 -2.2701 -6.5690
H  2.0292 -1.3508 -6.8628
H  2.0082 -3.1019 -6.6585
H  0.6991  0.0625 -7.9110
74
IM7-O-d+0    -276.37850  eV ;  -277.78663 eV
Au  3.6970  2.0800  1.4700
Au -3.0070 -2.1310  2.5550
Au -1.7260  1.8170 -3.7090
Au -1.1380 -3.0090 -2.1080
Au -0.3760 -0.0160 -1.9800
Au -1.7170  3.3480  2.4520
Au  1.7180 -1.8110  3.7460
Au -0.3530 -3.3170  2.4090
Au  1.1610  3.2060  2.2890
Au  3.0810 -0.6500 -3.0700
Au  0.4390 -4.5450 -0.1630
Au  0.9670 -1.7420 -0.2360
Au  2.3230  3.8240 -0.2920
Au  0.2110 -1.6760 -4.2810
Au  0.3660 -0.0390  1.9590
Au -3.6200  0.8360 -1.7670
Au -3.7120 -1.9790 -1.4530
Au -2.3900 -0.9490 -3.7750
Au  2.3380  0.9930  3.7210
Au  1.6770 -3.5520 -2.3950
Au -1.6970 -1.0040  0.3130
Au -2.2730 -3.7910  0.3780
Au -0.3750  1.6400  4.1840
Au -2.7390  0.7220  2.8680
Au  0.9930  1.0950 -4.1570
Au -2.4310  3.4590 -1.5520
Au  1.6820  1.0060 -0.3070
Au  3.4310 -0.7380  1.6650
Au -4.4050 -0.3640  0.7740
Au  0.3730  3.1470 -2.2460
Au  4.4280  0.4290 -0.7950
Au  2.4060 -3.4270  1.5610
Au -3.7420  2.3890  0.7210
Au  3.0680  2.1420 -2.5310
Au -0.4030  4.4710  0.2120
Au -0.9800 -1.1250  4.2540
Au -1.0010  1.7070  0.1890
Au  3.6660 -2.2980 -0.7330
O  2.2700 -2.3590 -4.1120
C  3.7404 -7.3956 -3.1896
C  4.2236 -8.5411 -2.5371
C  4.9097 -9.5413 -3.2337
C  3.9704 -7.2692 -4.5803
C  4.6798 -8.2519 -5.2785
C  5.1448 -9.3876 -4.6054
O  3.5899 -6.1450 -5.2566
H  4.0634 -8.6298 -1.4599
H  5.2710 -10.4258 -2.7055
H  4.8575 -8.1128 -6.3461
H  5.6803 -10.1597 -5.1621
C  2.4553 -5.4046 -4.6920
C  2.4788 -5.3059 -3.1959
C  3.0857 -6.2910 -2.4969
H  3.1329 -6.2726 -1.4064
H  1.5205 -5.8975 -5.0253
H  2.5128 -4.4141 -5.1578
C  7.3019 -4.2875 -2.4255
C  7.4459 -5.3438 -3.4638
C  8.0263 -6.5518 -3.2001
C  7.8228 -4.6919 -1.0877
C  8.4205 -5.9283 -0.8597
C  8.5376 -6.8469 -1.9061
O  7.6643 -3.8548 -0.0612
H  7.0335 -5.1279 -4.4518
H  8.0875 -7.3080 -3.9843
H  8.7536 -6.1679  0.1503
H  8.9938 -7.8200 -1.7175
C  6.7230 -2.7195 -0.2434
C  5.5809 -3.0347 -1.1516
C  5.8411 -3.7941 -2.2194
H  5.0980 -4.1192 -2.9461
H  7.3167 -1.8780 -0.6453
H  6.4226 -2.4740  0.7802
H  7.8573 -3.3778 -2.7524
74
IM7-O-d+d+    -276.06433 eV  ; -277.47446 eV
Au  3.6970  2.0800  1.4700
Au -3.0070 -2.1310  2.5550
Au -1.7260  1.8170 -3.7090
Au -1.1380 -3.0090 -2.1080
Au -0.3760 -0.0160 -1.9800
Au -1.7170  3.3480  2.4520
Au  1.7180 -1.8110  3.7460
Au -0.3530 -3.3170  2.4090
Au  1.1610  3.2060  2.2890
Au  3.0810 -0.6500 -3.0700
Au  0.4390 -4.5450 -0.1630
Au  0.9670 -1.7420 -0.2360
Au  2.3230  3.8240 -0.2920
Au  0.2110 -1.6760 -4.2810
Au  0.3660 -0.0390  1.9590
Au -3.6200  0.8360 -1.7670
Au -3.7120 -1.9790 -1.4530
Au -2.3900 -0.9490 -3.7750
Au  2.3380  0.9930  3.7210
Au  1.6770 -3.5520 -2.3950
Au -1.6970 -1.0040  0.3130
Au -2.2730 -3.7910  0.3780
Au -0.3750  1.6400  4.1840
Au -2.7390  0.7220  2.8680
Au  0.9930  1.0950 -4.1570
Au -2.4310  3.4590 -1.5520
Au  1.6820  1.0060 -0.3070
Au  3.4310 -0.7380  1.6650
Au -4.4050 -0.3640  0.7740
Au  0.3730  3.1470 -2.2460
Au  4.4280  0.4290 -0.7950
Au  2.4060 -3.4270  1.5610
Au -3.7420  2.3890  0.7210
Au  3.0680  2.1420 -2.5310
Au -0.4030  4.4710  0.2120
Au -0.9800 -1.1250  4.2540
Au -1.0010  1.7070  0.1890
Au  3.6660 -2.2980 -0.7330
O  2.2700 -2.3590 -4.1120
C  4.0426 -6.5111 -4.6135
C  4.9031 -6.5381 -5.7230
C  5.4200 -7.7405 -6.2150
C  3.7040 -7.7385 -3.9992
C  4.2257 -8.9445 -4.4789
C  5.0820 -8.9434 -5.5851
O  2.9179 -7.7856 -2.8845
H  5.1693 -5.5894 -6.1966
H  6.0887 -7.7374 -7.0780
H  3.9493 -9.8710 -3.9724
H  5.4843 -9.8903 -5.9519
C  2.0410 -6.6425 -2.6068
C  2.5415 -5.3200 -3.0987
C  3.4931 -5.2808 -4.0567
H  3.8368 -4.3260 -4.4619
H  1.9253 -6.6497 -1.5146
H  1.0492 -6.8569 -3.0488
C -0.9950 -2.7932 -8.4967
C -2.2850 -2.9563 -9.2164
C -2.6577 -4.1456 -9.7825
C -0.1679 -4.0300 -8.4684
C -0.5783 -5.2227 -9.0608
C -1.8040 -5.2823 -9.7279
O  0.9887 -4.0017 -7.8075
H -2.9409 -2.0842 -9.2636
H -3.6222 -4.2263 -10.2886
H  0.0679 -6.0973 -8.9709
H -2.1218 -6.2207 -10.1845
C  1.2336 -2.8424 -6.9211
C -0.0108 -2.3305 -6.2724
C -1.1260 -2.3181 -7.0043
H -2.1124 -2.0120 -6.6609
H  1.6903 -2.0538 -7.5461
H  1.9808 -3.1932 -6.2005
H -0.4044 -1.9799 -8.9764
73
IM8-O-d+0    -276.43194 eV  ; -280.25489   eV
Au  3.6970  2.0800  1.4700
Au -3.0070 -2.1310  2.5550
Au -1.7260  1.8170 -3.7090
Au -1.1380 -3.0090 -2.1080
Au -0.3760 -0.0160 -1.9800
Au -1.7170  3.3480  2.4520
Au  1.7180 -1.8110  3.7460
Au -0.3530 -3.3170  2.4090
Au  1.1610  3.2060  2.2890
Au  3.0810 -0.6500 -3.0700
Au  0.4390 -4.5450 -0.1630
Au  0.9670 -1.7420 -0.2360
Au  2.3230  3.8240 -0.2920
Au  0.2110 -1.6760 -4.2810
Au  0.3660 -0.0390  1.9590
Au -3.6200  0.8360 -1.7670
Au -3.7120 -1.9790 -1.4530
Au -2.3900 -0.9490 -3.7750
Au  2.3380  0.9930  3.7210
Au  1.6770 -3.5520 -2.3950
Au -1.6970 -1.0040  0.3130
Au -2.2730 -3.7910  0.3780
Au -0.3750  1.6400  4.1840
Au -2.7390  0.7220  2.8680
Au  0.9930  1.0950 -4.1570
Au -2.4310  3.4590 -1.5520
Au  1.6820  1.0060 -0.3070
Au  3.4310 -0.7380  1.6650
Au -4.4050 -0.3640  0.7740
Au  0.3730  3.1470 -2.2460
Au  4.4280  0.4290 -0.7950
Au  2.4060 -3.4270  1.5610
Au -3.7420  2.3890  0.7210
Au  3.0680  2.1420 -2.5310
Au -0.4030  4.4710  0.2120
Au -0.9800 -1.1250  4.2540
Au -1.0010  1.7070  0.1890
Au  3.6660 -2.2980 -0.7330
O  2.2700 -2.3590 -4.1120
C  2.4486 -7.7368 -3.7075
C  2.9238 -8.9646 -3.2192
C  2.9921 -10.1040 -4.0302
C  2.0382 -7.6719 -5.0608
C  2.1006 -8.8081 -5.8769
C  2.5792 -10.0201 -5.3636
O  1.5819 -6.5261 -5.6329
H  3.2428 -9.0126 -2.1745
H  3.3600 -11.0473 -3.6203
H  1.7730 -8.7194 -6.9146
H  2.6233 -10.8982 -6.0131
C  1.4101 -5.3078 -4.8166
C  1.8515 -5.3861 -3.3934
C  2.3478 -6.5334 -2.8877
H  2.6800 -6.5976 -1.8496
H  0.3379 -5.0524 -4.8746
H  1.9653 -4.5102 -5.3337
C  7.6610 -3.1907 -2.4100
C  8.3664 -3.0426 -3.6140
C  9.6817 -3.4976 -3.7579
C  8.3175 -3.8187 -1.3245
C  9.6326 -4.2791 -1.4621
C 10.3124 -4.1194 -2.6753
O  7.7219 -3.9921 -0.1130
H  7.8569 -2.5568 -4.4505
H 10.2055 -3.3651 -4.7069
H 10.1064 -4.7574 -0.6023
H 11.3373 -4.4855 -2.7687
C  6.3178 -3.5733  0.0876
C  5.6388 -2.8943 -1.0564
C  6.2928 -2.7247 -2.2275
H  5.8051 -2.2386 -3.0768
H  6.3333 -2.9161  0.9718
H  5.7718 -4.4888  0.3689
73
IM8-O-d+d+    -276.17975 eV  ; -279.98185 eV
Au  3.6970  2.0800  1.4700
Au -3.0070 -2.1310  2.5550
Au -1.7260  1.8170 -3.7090
Au -1.1380 -3.0090 -2.1080
Au -0.3760 -0.0160 -1.9800
Au -1.7170  3.3480  2.4520
Au  1.7180 -1.8110  3.7460
Au -0.3530 -3.3170  2.4090
Au  1.1610  3.2060  2.2890
Au  3.0810 -0.6500 -3.0700
Au  0.4390 -4.5450 -0.1630
Au  0.9670 -1.7420 -0.2360
Au  2.3230  3.8240 -0.2920
Au  0.2110 -1.6760 -4.2810
Au  0.3660 -0.0390  1.9590
Au -3.6200  0.8360 -1.7670
Au -3.7120 -1.9790 -1.4530
Au -2.3900 -0.9490 -3.7750
Au  2.3380  0.9930  3.7210
Au  1.6770 -3.5520 -2.3950
Au -1.6970 -1.0040  0.3130
Au -2.2730 -3.7910  0.3780
Au -0.3750  1.6400  4.1840
Au -2.7390  0.7220  2.8680
Au  0.9930  1.0950 -4.1570
Au -2.4310  3.4590 -1.5520
Au  1.6820  1.0060 -0.3070
Au  3.4310 -0.7380  1.6650
Au -4.4050 -0.3640  0.7740
Au  0.3730  3.1470 -2.2460
Au  4.4280  0.4290 -0.7950
Au  2.4060 -3.4270  1.5610
Au -3.7420  2.3890  0.7210
Au  3.0680  2.1420 -2.5310
Au -0.4030  4.4710  0.2120
Au -0.9800 -1.1250  4.2540
Au -1.0010  1.7070  0.1890
Au  3.6660 -2.2980 -0.7330
O  2.2700 -2.3590 -4.1120
C  3.8185 -6.6442 -4.6742
C  4.2465 -6.8621 -5.9945
C  4.8591 -8.0619 -6.3731
C  4.0153 -7.6798 -3.7282
C  4.6329 -8.8792 -4.0981
C  5.0535 -9.0688 -5.4208
O  3.6825 -7.5112 -2.4161
H  4.0969 -6.0638 -6.7261
H  5.1827 -8.2089 -7.4062
H  4.7786 -9.6479 -3.3370
H  5.5296 -10.0103 -5.7057
C  2.6568 -6.5031 -2.1004
C  2.6464 -5.3063 -2.9979
C  3.2126 -5.3981 -4.2208
H  3.2108 -4.5397 -4.8968
H  2.8689 -6.2280 -1.0602
H  1.6672 -6.9999 -2.1222
C -0.8508 -1.5715 -8.6041
C -1.8194 -1.0667 -9.4875
C -1.7816 -1.3517 -10.8564
C  0.1734 -2.3901 -9.1370
C  0.2289 -2.6634 -10.5081
C -0.7485 -2.1460 -11.3663
O  1.1746 -2.8702 -8.3460
H -2.6106 -0.4312 -9.0803
H -2.5479 -0.9491 -11.5220
H  1.0465 -3.2839 -10.8806
H -0.7033 -2.3733 -12.4342
C  0.8715 -3.0155 -6.9138
C -0.0054 -1.9425 -6.3437
C -0.8254 -1.2643 -7.1789
H -1.4971 -0.4853 -6.8125
H  1.8516 -3.0243 -6.4226
H  0.4020 -4.0065 -6.7635
57
TS1/2-O   -181.26474 eV  ; -181.58635 eV
Au  3.6970  2.0800  1.4700
Au -3.0070 -2.1310  2.5550
Au -1.7260  1.8170 -3.7090
Au -1.1380 -3.0090 -2.1080
Au -0.3760 -0.0160 -1.9800
Au -1.7170  3.3480  2.4520
Au  1.7180 -1.8110  3.7460
Au -0.3530 -3.3170  2.4090
Au  1.1610  3.2060  2.2890
Au  3.0810 -0.6500 -3.0700
Au  0.4390 -4.5450 -0.1630
Au  0.9670 -1.7420 -0.2360
Au  2.3230  3.8240 -0.2920
Au  0.2110 -1.6760 -4.2810
Au  0.3660 -0.0390  1.9590
Au -3.6200  0.8360 -1.7670
Au -3.7120 -1.9790 -1.4530
Au -2.3900 -0.9490 -3.7750
Au  2.3380  0.9930  3.7210
Au  1.6770 -3.5520 -2.3950
Au -1.6970 -1.0040  0.3130
Au -2.2730 -3.7910  0.3780
Au -0.3750  1.6400  4.1840
Au -2.7390  0.7220  2.8680
Au  0.9930  1.0950 -4.1570
Au -2.4310  3.4590 -1.5520
Au  1.6820  1.0060 -0.3070
Au  3.4310 -0.7380  1.6650
Au -4.4050 -0.3640  0.7740
Au  0.3730  3.1470 -2.2460
Au  4.4280  0.4290 -0.7950
Au  2.4060 -3.4270  1.5610
Au -3.7420  2.3890  0.7210
Au  3.0680  2.1420 -2.5310
Au -0.4030  4.4710  0.2120
Au -0.9800 -1.1250  4.2540
Au -1.0010  1.7070  0.1890
Au  3.6660 -2.2980 -0.7330
O  2.2700 -2.3590 -4.1120
C  4.0568 -7.5834 -3.6186
C  4.4606 -8.7285 -2.8756
C  3.8738 -9.9632 -3.0937
C  3.0669 -7.7514 -4.6323
C  2.4948 -9.0125 -4.8681
C  2.9080 -10.1095 -4.1161
O  2.5816 -6.7144 -5.3495
H  4.7431 -6.7352 -3.6849
H  5.2298 -8.6090 -2.1094
H  4.1773 -10.8307 -2.5063
H  1.7305 -9.1057 -5.6394
H  2.4720 -11.0926 -4.3130
C  2.6419 -5.3723 -4.7817
C  2.4534 -5.3691 -3.3062
C  2.8271 -6.2679 -2.4728
H  2.8265 -6.5953 -1.4421
H  1.8558 -4.8193 -5.3059
H  3.6058 -4.8954 -5.0239
57
TS2/3-O   -180.64302 eV  ; -181.14270 eV 
Au  3.6970  2.0800  1.4700
Au -3.0070 -2.1310  2.5550
Au -1.7260  1.8170 -3.7090
Au -1.1380 -3.0090 -2.1080
Au -0.3760 -0.0160 -1.9800
Au -1.7170  3.3480  2.4520
Au  1.7180 -1.8110  3.7460
Au -0.3530 -3.3170  2.4090
Au  1.1610  3.2060  2.2890
Au  3.0810 -0.6500 -3.0700
Au  0.4390 -4.5450 -0.1630
Au  0.9670 -1.7420 -0.2360
Au  2.3230  3.8240 -0.2920
Au  0.2110 -1.6760 -4.2810
Au  0.3660 -0.0390  1.9590
Au -3.6200  0.8360 -1.7670
Au -3.7120 -1.9790 -1.4530
Au -2.3900 -0.9490 -3.7750
Au  2.3380  0.9930  3.7210
Au  1.6770 -3.5520 -2.3950
Au -1.6970 -1.0040  0.3130
Au -2.2730 -3.7910  0.3780
Au -0.3750  1.6400  4.1840
Au -2.7390  0.7220  2.8680
Au  0.9930  1.0950 -4.1570
Au -2.4310  3.4590 -1.5520
Au  1.6820  1.0060 -0.3070
Au  3.4310 -0.7380  1.6650
Au -4.4050 -0.3640  0.7740
Au  0.3730  3.1470 -2.2460
Au  4.4280  0.4290 -0.7950
Au  2.4060 -3.4270  1.5610
Au -3.7420  2.3890  0.7210
Au  3.0680  2.1420 -2.5310
Au -0.4030  4.4710  0.2120
Au -0.9800 -1.1250  4.2540
Au -1.0010  1.7070  0.1890
Au  3.6660 -2.2980 -0.7330
O  2.2700 -2.3590 -4.1120
C  3.3137 -7.6575 -3.2155
C  3.9871 -8.7407 -2.5767
C  3.9783 -10.0004 -3.1479
C  2.6852 -7.8794 -4.4853
C  2.6315 -9.1763 -5.0068
C  3.2754 -10.2219 -4.3494
O  2.0220 -6.9081 -5.1305
H  3.9957 -6.5982 -3.0769
H  4.5063 -8.5585 -1.6349
H  4.5112 -10.8209 -2.6677
H  2.0708 -9.3452 -5.9274
H  3.2170 -11.2290 -4.7647
C  2.1661 -5.5223 -4.6542
C  2.1980 -5.3943 -3.1646
C  2.8337 -6.3768 -2.4639
H  2.9752 -6.3899 -1.3837
H  1.3112 -4.9988 -5.0911
H  3.0808 -5.0884 -5.0945
57
TS3/4-O  -181.53862 eV  ; -181.97757 eV
Au  3.6970  2.0800  1.4700
Au -3.0070 -2.1310  2.5550
Au -1.7260  1.8170 -3.7090
Au -1.1380 -3.0090 -2.1080
Au -0.3760 -0.0160 -1.9800
Au -1.7170  3.3480  2.4520
Au  1.7180 -1.8110  3.7460
Au -0.3530 -3.3170  2.4090
Au  1.1610  3.2060  2.2890
Au  3.0810 -0.6500 -3.0700
Au  0.4390 -4.5450 -0.1630
Au  0.9670 -1.7420 -0.2360
Au  2.3230  3.8240 -0.2920
Au  0.2110 -1.6760 -4.2810
Au  0.3660 -0.0390  1.9590
Au -3.6200  0.8360 -1.7670
Au -3.7120 -1.9790 -1.4530
Au -2.3900 -0.9490 -3.7750
Au  2.3380  0.9930  3.7210
Au  1.6770 -3.5520 -2.3950
Au -1.6970 -1.0040  0.3130
Au -2.2730 -3.7910  0.3780
Au -0.3750  1.6400  4.1840
Au -2.7390  0.7220  2.8680
Au  0.9930  1.0950 -4.1570
Au -2.4310  3.4590 -1.5520
Au  1.6820  1.0060 -0.3070
Au  3.4310 -0.7380  1.6650
Au -4.4050 -0.3640  0.7740
Au  0.3730  3.1470 -2.2460
Au  4.4280  0.4290 -0.7950
Au  2.4060 -3.4270  1.5610
Au -3.7420  2.3890  0.7210
Au  3.0680  2.1420 -2.5310
Au -0.4030  4.4710  0.2120
Au -0.9800 -1.1250  4.2540
Au -1.0010  1.7070  0.1890
Au  3.6660 -2.2980 -0.7330
O  2.2700 -2.3590 -4.1120
C  3.5974 -7.0319 -2.3178
C  4.9462 -7.4314 -2.2196
C  5.6186 -7.9325 -3.3325
C  2.9218 -7.1833 -3.5516
C  3.6046 -7.6631 -4.6773
C  4.9455 -8.0298 -4.5615
O  1.6230 -6.7895 -3.6965
H  3.4928 -5.8877 -0.4445
H  5.4632 -7.3203 -1.2665
H  6.6630 -8.2345 -3.2562
H  3.0783 -7.7415 -5.6275
H  5.4807 -8.3931 -5.4426
C  0.8350 -6.7592 -2.4692
C  1.5034 -6.0158 -1.3325
C  2.9025 -6.3455 -1.2419
H  1.9970 -6.9426 -0.5310
H  0.6269 -7.8009 -2.1577
H -0.1080 -6.2850 -2.7567
74
TS6/7-O-d+0  -275.94087 eV  ; -277.29942 eV
Au  3.6970  2.0800  1.4700
Au -3.0070 -2.1310  2.5550
Au -1.7260  1.8170 -3.7090
Au -1.1380 -3.0090 -2.1080
Au -0.3760 -0.0160 -1.9800
Au -1.7170  3.3480  2.4520
Au  1.7180 -1.8110  3.7460
Au -0.3530 -3.3170  2.4090
Au  1.1610  3.2060  2.2890
Au  3.0810 -0.6500 -3.0700
Au  0.4390 -4.5450 -0.1630
Au  0.9670 -1.7420 -0.2360
Au  2.3230  3.8240 -0.2920
Au  0.2110 -1.6760 -4.2810
Au  0.3660 -0.0390  1.9590
Au -3.6200  0.8360 -1.7670
Au -3.7120 -1.9790 -1.4530
Au -2.3900 -0.9490 -3.7750
Au  2.3380  0.9930  3.7210
Au  1.6770 -3.5520 -2.3950
Au -1.6970 -1.0040  0.3130
Au -2.2730 -3.7910  0.3780
Au -0.3750  1.6400  4.1840
Au -2.7390  0.7220  2.8680
Au  0.9930  1.0950 -4.1570
Au -2.4310  3.4590 -1.5520
Au  1.6820  1.0060 -0.3070
Au  3.4310 -0.7380  1.6650
Au -4.4050 -0.3640  0.7740
Au  0.3730  3.1470 -2.2460
Au  4.4280  0.4290 -0.7950
Au  2.4060 -3.4270  1.5610
Au -3.7420  2.3890  0.7210
Au  3.0680  2.1420 -2.5310
Au -0.4030  4.4710  0.2120
Au -0.9800 -1.1250  4.2540
Au -1.0010  1.7070  0.1890
Au  3.6660 -2.2980 -0.7330
O  2.2700 -2.3590 -4.1120
C  3.7407 -7.3938 -3.1993
C  4.2228 -8.5359 -2.5394
C  4.9257 -9.5300 -3.2251
C  3.9841 -7.2686 -4.5877
C  4.7083 -8.2475 -5.2760
C  5.1724 -9.3794 -4.5956
O  3.5996 -6.1458 -5.2669
H  4.0469 -8.6268 -1.4647
H  5.2866 -10.4119 -2.6922
H  4.8932 -8.1119 -6.3429
H  5.7182 -10.1514 -5.1431
C  2.4473 -5.4230 -4.7148
C  2.4670 -5.3079 -3.2174
C  3.0749 -6.2920 -2.5152
H  3.1077 -6.2759 -1.4238
H  1.5259 -5.9417 -5.0446
H  2.4873 -4.4368 -5.1915
C  7.6770 -4.3217 -2.5667
C  7.7616 -5.3419 -3.5506
C  8.1181 -6.6367 -3.2057
C  7.9856 -4.6530 -1.2161
C  8.4012 -5.9532 -0.8876
C  8.4858 -6.9281 -1.8782
O  7.8312 -3.7767 -0.1924
H  7.4917 -5.0969 -4.5796
H  8.1237 -7.4258 -3.9596
H  8.6364 -6.1790  0.1536
H  8.8113 -7.9368 -1.6166
C  6.8117 -2.7267 -0.2877
C  5.6437 -3.1139 -1.1129
C  5.6022 -3.8740 -2.1336
H  5.0078 -4.3730 -2.8885
H  7.2652 -1.8130 -0.7048
H  6.5429 -2.5336  0.7561
H  7.6891 -3.2768 -2.8808
74
TS6/7-O-d+d+  -275.74314 eV  ; -277.10862 eV
Au  3.6970  2.0800  1.4700
Au -3.0070 -2.1310  2.5550
Au -1.7260  1.8170 -3.7090
Au -1.1380 -3.0090 -2.1080
Au -0.3760 -0.0160 -1.9800
Au -1.7170  3.3480  2.4520
Au  1.7180 -1.8110  3.7460
Au -0.3530 -3.3170  2.4090
Au  1.1610  3.2060  2.2890
Au  3.0810 -0.6500 -3.0700
Au  0.4390 -4.5450 -0.1630
Au  0.9670 -1.7420 -0.2360
Au  2.3230  3.8240 -0.2920
Au  0.2110 -1.6760 -4.2810
Au  0.3660 -0.0390  1.9590
Au -3.6200  0.8360 -1.7670
Au -3.7120 -1.9790 -1.4530
Au -2.3900 -0.9490 -3.7750
Au  2.3380  0.9930  3.7210
Au  1.6770 -3.5520 -2.3950
Au -1.6970 -1.0040  0.3130
Au -2.2730 -3.7910  0.3780
Au -0.3750  1.6400  4.1840
Au -2.7390  0.7220  2.8680
Au  0.9930  1.0950 -4.1570
Au -2.4310  3.4590 -1.5520
Au  1.6820  1.0060 -0.3070
Au  3.4310 -0.7380  1.6650
Au -4.4050 -0.3640  0.7740
Au  0.3730  3.1470 -2.2460
Au  4.4280  0.4290 -0.7950
Au  2.4060 -3.4270  1.5610
Au -3.7420  2.3890  0.7210
Au  3.0680  2.1420 -2.5310
Au -0.4030  4.4710  0.2120
Au -0.9800 -1.1250  4.2540
Au -1.0010  1.7070  0.1890
Au  3.6660 -2.2980 -0.7330
O  2.2700 -2.3590 -4.1120
C  4.0522 -6.5095 -4.6199
C  4.9148 -6.5405 -5.7279
C  5.4288 -7.7452 -6.2178
C  3.7105 -7.7353 -4.0056
C  4.2279 -8.9439 -4.4845
C  5.0840 -8.9459 -5.5901
O  2.9230 -7.7816 -2.8910
H  5.1863 -5.5933 -6.2025
H  6.1002 -7.7447 -7.0800
H  3.9468 -9.8690 -3.9778
H  5.4832 -9.8954 -5.9565
C  2.0510 -6.6359 -2.6103
C  2.5513 -5.3151 -3.1062
C  3.5031 -5.2775 -4.0653
H  3.8480 -4.3236 -4.4702
H  1.9443 -6.6397 -1.5171
H  1.0558 -6.8487 -3.0444
C -0.9652 -2.7965 -8.8331
C -2.2234 -2.9522 -9.4851
C -2.6778 -4.2052 -9.8748
C -0.1672 -3.9640 -8.6294
C -0.6235 -5.2204 -9.0611
C -1.8570 -5.3347 -9.6958
O  1.0042 -3.9273 -7.9594
H -2.8388 -2.0667 -9.6444
H -3.6558 -4.3084 -10.3533
H  0.0099 -6.0924 -8.8796
H -2.1977 -6.3122 -10.0374
C  1.2397 -2.8459 -6.9974
C  0.0020 -2.3950 -6.3159
C -1.1849 -2.3454 -6.8043
H -2.2223 -2.1377 -6.5904
H  1.7062 -1.9966 -7.5225
H  1.9670 -3.2549 -6.2894
H -0.4681 -1.8261 -8.8937
73
TS8-O-d+0    -275.24310  eV ;  -279.11684  eV
Au  3.6970  2.0800  1.4700
Au -3.0070 -2.1310  2.5550
Au -1.7260  1.8170 -3.7090
Au -1.1380 -3.0090 -2.1080
Au -0.3760 -0.0160 -1.9800
Au -1.7170  3.3480  2.4520
Au  1.7180 -1.8110  3.7460
Au -0.3530 -3.3170  2.4090
Au  1.1610  3.2060  2.2890
Au  3.0810 -0.6500 -3.0700
Au  0.4390 -4.5450 -0.1630
Au  0.9670 -1.7420 -0.2360
Au  2.3230  3.8240 -0.2920
Au  0.2110 -1.6760 -4.2810
Au  0.3660 -0.0390  1.9590
Au -3.6200  0.8360 -1.7670
Au -3.7120 -1.9790 -1.4530
Au -2.3900 -0.9490 -3.7750
Au  2.3380  0.9930  3.7210
Au  1.6770 -3.5520 -2.3950
Au -1.6970 -1.0040  0.3130
Au -2.2730 -3.7910  0.3780
Au -0.3750  1.6400  4.1840
Au -2.7390  0.7220  2.8680
Au  0.9930  1.0950 -4.1570
Au -2.4310  3.4590 -1.5520
Au  1.6820  1.0060 -0.3070
Au  3.4310 -0.7380  1.6650
Au -4.4050 -0.3640  0.7740
Au  0.3730  3.1470 -2.2460
Au  4.4280  0.4290 -0.7950
Au  2.4060 -3.4270  1.5610
Au -3.7420  2.3890  0.7210
Au  3.0680  2.1420 -2.5310
Au -0.4030  4.4710  0.2120
Au -0.9800 -1.1250  4.2540
Au -1.0010  1.7070  0.1890
Au  3.6660 -2.2980 -0.7330
O  2.2700 -2.3590 -4.1120
C  3.5579 -7.3915 -2.7351
C  3.7214 -8.6389 -2.0897
C  4.0137 -9.8004 -2.8100
C  3.6434 -7.3775 -4.1554
C  3.9198 -8.5432 -4.8767
C  4.1281 -9.7519 -4.2053
O  3.3906 -6.2239 -4.8366
H  3.6221 -8.6868 -1.0029
H  4.1741 -10.7423 -2.2837
H  4.0010 -8.4876 -5.9631
H  4.4005 -10.6472 -4.7648
C  3.8332 -5.0093 -4.1503
C  3.3877 -4.9291 -2.6991
C  3.2681 -6.1489 -2.0563
H  2.9844 -6.1850 -0.9995
H  3.4219 -4.1802 -4.7410
H  4.9343 -4.9974 -4.2013
C  7.0572 -3.8257 -2.9415
C  7.9918 -3.3235 -3.8799
C  9.1606 -4.0201 -4.1890
C  7.4000 -5.0283 -2.2581
C  8.5579 -5.7383 -2.5880
C  9.4348 -5.2426 -3.5578
O  6.5668 -5.5719 -1.3278
H  7.7627 -2.3831 -4.3901
H  9.8456 -3.6304 -4.9445
H  8.7404 -6.6889 -2.0867
H 10.3194 -5.8183 -3.8324
C  5.5939 -4.6412 -0.7431
C  4.8967 -3.7629 -1.7486
C  5.7391 -3.2723 -2.7440
H  5.3905 -2.5014 -3.4373
H  6.1330 -3.9910 -0.0288
H  4.9090 -5.2847 -0.1825
73
TS8-O-d+d+    -274.66705 eV  ; -278.50796 eV
Au  3.6970  2.0800  1.4700
Au -3.0070 -2.1310  2.5550
Au -1.7260  1.8170 -3.7090
Au -1.1380 -3.0090 -2.1080
Au -0.3760 -0.0160 -1.9800
Au -1.7170  3.3480  2.4520
Au  1.7180 -1.8110  3.7460
Au -0.3530 -3.3170  2.4090
Au  1.1610  3.2060  2.2890
Au  3.0810 -0.6500 -3.0700
Au  0.4390 -4.5450 -0.1630
Au  0.9670 -1.7420 -0.2360
Au  2.3230  3.8240 -0.2920
Au  0.2110 -1.6760 -4.2810
Au  0.3660 -0.0390  1.9590
Au -3.6200  0.8360 -1.7670
Au -3.7120 -1.9790 -1.4530
Au -2.3900 -0.9490 -3.7750
Au  2.3380  0.9930  3.7210
Au  1.6770 -3.5520 -2.3950
Au -1.6970 -1.0040  0.3130
Au -2.2730 -3.7910  0.3780
Au -0.3750  1.6400  4.1840
Au -2.7390  0.7220  2.8680
Au  0.9930  1.0950 -4.1570
Au -2.4310  3.4590 -1.5520
Au  1.6820  1.0060 -0.3070
Au  3.4310 -0.7380  1.6650
Au -4.4050 -0.3640  0.7740
Au  0.3730  3.1470 -2.2460
Au  4.4280  0.4290 -0.7950
Au  2.4060 -3.4270  1.5610
Au -3.7420  2.3890  0.7210
Au  3.0680  2.1420 -2.5310
Au -0.4030  4.4710  0.2120
Au -0.9800 -1.1250  4.2540
Au -1.0010  1.7070  0.1890
Au  3.6660 -2.2980 -0.7330
O  2.2700 -2.3590 -4.1120
C  2.1020 -6.7157 -5.3432
C  3.1662 -7.2469 -6.1050
C  3.0005 -8.3709 -6.9188
C  0.8684 -7.4205 -5.3659
C  0.6906 -8.5349 -6.1962
C  1.7513 -9.0028 -6.9799
O -0.2107 -6.9721 -4.6739
H  4.1218 -6.7182 -6.0929
H  3.8310 -8.7276 -7.5369
H -0.2964 -8.9973 -6.2352
H  1.5894 -9.8490 -7.6533
C  0.0467 -5.9516 -3.6538
C  1.0361 -4.8973 -4.0700
C  2.1361 -5.4027 -4.7486
H  2.9877 -4.7659 -4.9978
H  0.4200 -6.4655 -2.7508
H -0.9423 -5.5374 -3.4259
C -1.4251 -4.6252 -7.1101
C -2.6815 -5.1223 -7.5213
C -2.8376 -5.8290 -8.7152
C -0.3305 -4.8036 -7.9985
C -0.4773 -5.5246 -9.1891
C -1.7278 -6.0470 -9.5426
O  0.9133 -4.3653 -7.6654
H -3.5344 -4.9795 -6.8536
H -3.8147 -6.2414 -8.9877
H  0.4045 -5.6907 -9.8103
H -1.8265 -6.6315 -10.4603
C  0.9536 -3.3216 -6.6379
C  0.0612 -3.5772 -5.4478
C -1.1721 -4.1009 -5.7872
H -1.9621 -4.2415 -5.0467
H  0.6312 -2.3821 -7.1229
H  2.0058 -3.2277 -6.3583
74
Au38O2-IM8:1+d+      -279.99923 eV  ; -283.84305   eV
Au  3.5870  2.0500  1.5000
Au -3.0100 -2.0870  2.5930
Au -1.6630  1.8120 -3.7230
Au -1.1870 -3.0400 -2.0960
Au -0.3880  0.0080 -1.9470
Au -1.7900  3.3480  2.4910
Au  1.7430 -1.8210  3.7010
Au -0.3710 -3.3110  2.4340
Au  1.0710  3.1430  2.2900
Au  3.3650 -0.8770 -3.5010
Au  0.4190 -4.4680 -0.1430
Au  0.9600 -1.7150 -0.2210
Au  2.2070  3.7840 -0.2540
Au  0.2050 -1.7090 -4.2570
Au  0.3560  0.0000  1.9920
Au -3.6440  0.8520 -1.7430
Au -3.7160 -1.9520 -1.3910
Au -2.3750 -0.9270 -3.7010
Au  2.2930  0.9590  3.7990
Au  1.6450 -3.5310 -2.4200
Au -1.6980 -0.9590  0.3660
Au -2.3020 -3.7480  0.4190
Au -0.4280  1.6200  4.2270
Au -2.8100  0.7320  2.9360
Au  1.0710  0.9470 -4.1140
Au -2.3870  3.4380 -1.5850
Au  1.6930  0.9780 -0.3430
Au  3.5110 -0.7610  1.6880
Au -4.4010 -0.3230  0.8180
Au  0.3880  3.2040 -2.3200
Au  4.4580  0.3790 -0.6680
Au  2.4410 -3.3960  1.5150
Au -3.7590  2.4140  0.6940
Au  2.9840  2.2310 -2.5450
Au -0.5100  4.5080  0.2400
Au -0.9610 -1.1560  4.2790
Au -1.0000  1.7400  0.2470
Au  3.6070 -2.2670 -0.8660
O  2.2620 -2.4680 -4.2320
O  4.5290  0.7060 -2.8320
C  7.2777 -1.7452 -5.3385
C  8.5779 -1.2199 -5.4195
C  9.5880 -1.8864 -6.1205
C  7.0186 -2.9859 -5.9699
C  8.0163 -3.6435 -6.6958
C  9.3013 -3.0945 -6.7669
O  5.7686 -3.5360 -5.9472
H  8.7898 -0.2704 -4.9215
H 10.5936 -1.4639 -6.1542
H  7.7711 -4.5895 -7.1832
H 10.0820 -3.6208 -7.3217
C  4.9462 -3.1970 -4.7870
C  5.0461 -1.7532 -4.4054
C  6.1660 -1.0625 -4.6773
H  6.2682 -0.0120 -4.3953
H  5.2574 -3.8357 -3.9378
H  3.9197 -3.4596 -5.0658
C  8.3898 -1.5033  0.1079
C  8.9027 -2.7165  0.5957
C 10.2413 -3.0749  0.3999
C  9.2663 -0.6394 -0.5890
C 10.6068 -0.9853 -0.7810
C 11.0927 -2.2036 -0.2878
O  8.8458  0.5818 -1.0333
H  8.2258 -3.3829  1.1367
H 10.6147 -4.0308  0.7755
H 11.2501 -0.2963 -1.3312
H 12.1373 -2.4752 -0.4604
C  7.4062  0.7508 -1.2903
C  6.4938 -0.0514 -0.4194
C  6.9965 -1.1043  0.2649
H  6.3561 -1.7197  0.9005
H  7.2116  0.5088 -2.3502
H  7.2432  1.8283 -1.1585
74
Au38O2-IM8:1+0      -280.19743 eV  ; -284.06893   eV
Au  3.5870  2.0500  1.5000
Au -3.0100 -2.0870  2.5930
Au -1.6630  1.8120 -3.7230
Au -1.1870 -3.0400 -2.0960
Au -0.3880  0.0080 -1.9470
Au -1.7900  3.3480  2.4910
Au  1.7430 -1.8210  3.7010
Au -0.3710 -3.3110  2.4340
Au  1.0710  3.1430  2.2900
Au  3.3650 -0.8770 -3.5010
Au  0.4190 -4.4680 -0.1430
Au  0.9600 -1.7150 -0.2210
Au  2.2070  3.7840 -0.2540
Au  0.2050 -1.7090 -4.2570
Au  0.3560  0.0000  1.9920
Au -3.6440  0.8520 -1.7430
Au -3.7160 -1.9520 -1.3910
Au -2.3750 -0.9270 -3.7010
Au  2.2930  0.9590  3.7990
Au  1.6450 -3.5310 -2.4200
Au -1.6980 -0.9590  0.3660
Au -2.3020 -3.7480  0.4190
Au -0.4280  1.6200  4.2270
Au -2.8100  0.7320  2.9360
Au  1.0710  0.9470 -4.1140
Au -2.3870  3.4380 -1.5850
Au  1.6930  0.9780 -0.3430
Au  3.5110 -0.7610  1.6880
Au -4.4010 -0.3230  0.8180
Au  0.3880  3.2040 -2.3200
Au  4.4580  0.3790 -0.6680
Au  2.4410 -3.3960  1.5150
Au -3.7590  2.4140  0.6940
Au  2.9840  2.2310 -2.5450
Au -0.5100  4.5080  0.2400
Au -0.9610 -1.1560  4.2790
Au -1.0000  1.7400  0.2470
Au  3.6070 -2.2670 -0.8660
O  2.2620 -2.4680 -4.2320
O  4.5290  0.7060 -2.8320
C  7.0986 -1.5404 -5.6933
C  8.4763 -1.3217 -5.5499
C  9.3705 -1.6054 -6.5880
C  6.6251 -2.0666 -6.9196
C  7.5151 -2.3626 -7.9569
C  8.8844 -2.1217 -7.7933
O  5.3063 -2.3747 -7.1035
H  8.8403 -0.9353 -4.5951
H 10.4378 -1.4216 -6.4539
H  7.1183 -2.7820 -8.8829
H  9.5695 -2.3371 -8.6162
C  4.3169 -1.6742 -6.2773
C  4.8207 -1.3177 -4.9193
C  6.1291 -1.2649 -4.6352
H  6.4892 -0.9830 -3.6443
H  3.4606 -2.3572 -6.2027
H  3.9928 -0.7673 -6.8231
C  6.4800 -5.4333 -1.8923
C  6.5222 -6.5737 -2.7108
C  7.4759 -7.5789 -2.5144
C  7.4295 -5.3291 -0.8479
C  8.3887 -6.3260 -0.6482
C  8.4124 -7.4506 -1.4828
O  7.4705 -4.2259 -0.0440
H  5.7865 -6.6642 -3.5141
H  7.4866 -8.4557 -3.1659
H  9.1039 -6.2034  0.1679
H  9.1610 -8.2282 -1.3148
C  6.2101 -3.4925  0.1344
C  5.3083 -3.4618 -1.0590
C  5.4828 -4.3798 -2.0361
H  4.8336 -4.4094 -2.9155
H  6.5276 -2.4812  0.4190
H  5.6749 -3.9269  1.0033
74
Au38O2-IM8:d+0      -280.76134 eV  ; -284.60953   eV
Au  3.5870  2.0500  1.5000
Au -3.0100 -2.0870  2.5930
Au -1.6630  1.8120 -3.7230
Au -1.1870 -3.0400 -2.0960
Au -0.3880  0.0080 -1.9470
Au -1.7900  3.3480  2.4910
Au  1.7430 -1.8210  3.7010
Au -0.3710 -3.3110  2.4340
Au  1.0710  3.1430  2.2900
Au  3.3650 -0.8770 -3.5010
Au  0.4190 -4.4680 -0.1430
Au  0.9600 -1.7150 -0.2210
Au  2.2070  3.7840 -0.2540
Au  0.2050 -1.7090 -4.2570
Au  0.3560  0.0000  1.9920
Au -3.6440  0.8520 -1.7430
Au -3.7160 -1.9520 -1.3910
Au -2.3750 -0.9270 -3.7010
Au  2.2930  0.9590  3.7990
Au  1.6450 -3.5310 -2.4200
Au -1.6980 -0.9590  0.3660
Au -2.3020 -3.7480  0.4190
Au -0.4280  1.6200  4.2270
Au -2.8100  0.7320  2.9360
Au  1.0710  0.9470 -4.1140
Au -2.3870  3.4380 -1.5850
Au  1.6930  0.9780 -0.3430
Au  3.5110 -0.7610  1.6880
Au -4.4010 -0.3230  0.8180
Au  0.3880  3.2040 -2.3200
Au  4.4580  0.3790 -0.6680
Au  2.4410 -3.3960  1.5150
Au -3.7590  2.4140  0.6940
Au  2.9840  2.2310 -2.5450
Au -0.5100  4.5080  0.2400
Au -0.9610 -1.1560  4.2790
Au -1.0000  1.7400  0.2470
Au  3.6070 -2.2670 -0.8660
O  2.2620 -2.4680 -4.2320
O  4.5290  0.7060 -2.8320
C  3.9393  5.5030 -5.4222
C  3.6059  6.8373 -5.7069
C  4.2053  7.5370 -6.7609
C  4.9169  4.8741 -6.2282
C  5.5177  5.5662 -7.2874
C  5.1595  6.8919 -7.5542
O  5.3128  3.5918 -6.0278
H  2.8547  7.3287 -5.0828
H  3.9266  8.5739 -6.9623
H  6.2642  5.0461 -7.8909
H  5.6342  7.4186 -8.3853
C  4.7462  2.7942 -4.9208
C  3.6943  3.4605 -4.0890
C  3.3228  4.7336 -4.3455
H  2.5481  5.2237 -3.7531
H  5.5966  2.4806 -4.2971
H  4.3497  1.8806 -5.3898
C  8.3824 -1.3436 -1.6558
C  8.9525 -2.0887 -2.6995
C 10.2945 -2.4830 -2.6704
C  9.1964 -0.9957 -0.5532
C 10.5432 -1.3798 -0.5216
C 11.0876 -2.1238 -1.5760
O  8.7248 -0.2764  0.5027
H  8.3206 -2.3590 -3.5493
H 10.7150 -3.0641 -3.4942
H 11.1502 -1.0873  0.3374
H 12.1393 -2.4180 -1.5398
C  7.3016  0.1331  0.5569
C  6.4611 -0.2313 -0.6198
C  6.9885 -0.9210 -1.6541
H  6.3812 -1.1704 -2.5267
H  7.3240  1.2259  0.6971
H  6.8910 -0.3086  1.4803
74
Au38O2-TS8:1+d+    -278.24046 eV  ; -282.18403   eV
Au  3.5870  2.0500  1.5000
Au -3.0100 -2.0870  2.5930
Au -1.6630  1.8120 -3.7230
Au -1.1870 -3.0400 -2.0960
Au -0.3880  0.0080 -1.9470
Au -1.7900  3.3480  2.4910
Au  1.7430 -1.8210  3.7010
Au -0.3710 -3.3110  2.4340
Au  1.0710  3.1430  2.2900
Au  3.3650 -0.8770 -3.5010
Au  0.4190 -4.4680 -0.1430
Au  0.9600 -1.7150 -0.2210
Au  2.2070  3.7840 -0.2540
Au  0.2050 -1.7090 -4.2570
Au  0.3560  0.0000  1.9920
Au -3.6440  0.8520 -1.7430
Au -3.7160 -1.9520 -1.3910
Au -2.3750 -0.9270 -3.7010
Au  2.2930  0.9590  3.7990
Au  1.6450 -3.5310 -2.4200
Au -1.6980 -0.9590  0.3660
Au -2.3020 -3.7480  0.4190
Au -0.4280  1.6200  4.2270
Au -2.8100  0.7320  2.9360
Au  1.0710  0.9470 -4.1140
Au -2.3870  3.4380 -1.5850
Au  1.6930  0.9780 -0.3430
Au  3.5110 -0.7610  1.6880
Au -4.4010 -0.3230  0.8180
Au  0.3880  3.2040 -2.3200
Au  4.4580  0.3790 -0.6680
Au  2.4410 -3.3960  1.5150
Au -3.7590  2.4140  0.6940
Au  2.9840  2.2310 -2.5450
Au -0.5100  4.5080  0.2400
Au -0.9610 -1.1560  4.2790
Au -1.0000  1.7400  0.2470
Au  3.6070 -2.2670 -0.8660
O  2.2620 -2.4680 -4.2320
O  4.5290  0.7060 -2.8320
C  7.1862 -1.8824 -5.2121
C  8.2687 -1.3289 -5.9270
C  9.2038 -2.1480 -6.5666
C  7.0742 -3.2947 -5.1793
C  8.0026 -4.1171 -5.8174
C  9.0781 -3.5407 -6.5055
O  6.0062 -3.8718 -4.5474
H  8.3819 -0.2402 -5.9498
H 10.0460 -1.6943 -7.0915
H  7.8868 -5.2005 -5.7377
H  9.8394 -4.1872 -6.9515
C  5.6010 -3.2026 -3.3237
C  5.4897 -1.7039 -3.4651
C  6.2202 -1.1089 -4.4636
H  6.1518 -0.0312 -4.6208
H  6.3395 -3.4423 -2.5357
H  4.6413 -3.6693 -3.0642
C  8.1707 -1.9204 -0.2416
C  8.7368 -3.0043  0.4603
C 10.0695 -2.9870  0.8737
C  8.9873 -0.7903 -0.4922
C 10.3292 -0.7733 -0.0959
C 10.8695 -1.8745  0.5767
O  8.4637  0.3286 -1.0587
H  8.0954 -3.8586  0.6887
H 10.4825 -3.8414  1.4126
H 10.9380  0.1016 -0.3331
H 11.9248 -1.8549  0.8565
C  7.3178  0.1553 -1.9581
C  6.3140 -0.8961 -1.5227
C  6.7978 -1.8859 -0.6948
H  6.1514 -2.6983 -0.3413
H  7.7240 -0.0839 -2.9538
H  6.8646  1.1497 -2.0028
74
Au38O2-TS8:1+0     -279.29451 eV  ; -283.18903   eV
Au  3.5870  2.0500  1.5000
Au -3.0100 -2.0870  2.5930
Au -1.6630  1.8120 -3.7230
Au -1.1870 -3.0400 -2.0960
Au -0.3880  0.0080 -1.9470
Au -1.7900  3.3480  2.4910
Au  1.7430 -1.8210  3.7010
Au -0.3710 -3.3110  2.4340
Au  1.0710  3.1430  2.2900
Au  3.3650 -0.8770 -3.5010
Au  0.4190 -4.4680 -0.1430
Au  0.9600 -1.7150 -0.2210
Au  2.2070  3.7840 -0.2540
Au  0.2050 -1.7090 -4.2570
Au  0.3560  0.0000  1.9920
Au -3.6440  0.8520 -1.7430
Au -3.7160 -1.9520 -1.3910
Au -2.3750 -0.9270 -3.7010
Au  2.2930  0.9590  3.7990
Au  1.6450 -3.5310 -2.4200
Au -1.6980 -0.9590  0.3660
Au -2.3020 -3.7480  0.4190
Au -0.4280  1.6200  4.2270
Au -2.8100  0.7320  2.9360
Au  1.0710  0.9470 -4.1140
Au -2.3870  3.4380 -1.5850
Au  1.6930  0.9780 -0.3430
Au  3.5110 -0.7610  1.6880
Au -4.4010 -0.3230  0.8180
Au  0.3880  3.2040 -2.3200
Au  4.4580  0.3790 -0.6680
Au  2.4410 -3.3960  1.5150
Au -3.7590  2.4140  0.6940
Au  2.9840  2.2310 -2.5450
Au -0.5100  4.5080  0.2400
Au -0.9610 -1.1560  4.2790
Au -1.0000  1.7400  0.2470
Au  3.6070 -2.2670 -0.8660
O  2.2620 -2.4680 -4.2320
O  4.5290  0.7060 -2.8320
C  7.4199 -1.6094 -4.7539
C  8.6950 -1.0150 -4.6746
C  9.7136 -1.3720 -5.5604
C  7.1936 -2.5730 -5.7688
C  8.2166 -2.9463 -6.6461
C  9.4774 -2.3464 -6.5407
O  5.9383 -3.0769 -5.9550
H  8.8725 -0.2671 -3.8987
H 10.6989 -0.9036 -5.4844
H  8.0126 -3.7077 -7.4016
H 10.2799 -2.6516 -7.2179
C  5.1286 -3.2445 -4.7528
C  5.2479 -2.1205 -3.7457
C  6.3347 -1.2862 -3.8667
H  6.4021 -0.3814 -3.2558
H  5.4445 -4.1937 -4.2857
H  4.0943 -3.3458 -5.1048
C  6.3387 -5.3294 -2.1471
C  6.2752 -6.6642 -2.6078
C  7.4053 -7.4788 -2.6502
C  7.6063 -4.8298 -1.7490
C  8.7370 -5.6561 -1.7598
C  8.6390 -6.9800 -2.2071
O  7.7955 -3.5362 -1.3996
H  5.3104 -7.0340 -2.9671
H  7.3269 -8.4969 -3.0398
H  9.6805 -5.2283 -1.4160
H  9.5320 -7.6105 -2.2211
C  6.6184 -2.6631 -1.2102
C  5.3359 -3.0764 -1.8934
C  5.2134 -4.4346 -2.1768
H  4.2588 -4.8446 -2.5179
H  6.9642 -1.6858 -1.5740
H  6.4539 -2.5983 -0.1219
74
Au38O2-TS8:d+0     -278.94129 eV  ; -282.86029   eV
Au  3.5870  2.0500  1.5000
Au -3.0100 -2.0870  2.5930
Au -1.6630  1.8120 -3.7230
Au -1.1870 -3.0400 -2.0960
Au -0.3880  0.0080 -1.9470
Au -1.7900  3.3480  2.4910
Au  1.7430 -1.8210  3.7010
Au -0.3710 -3.3110  2.4340
Au  1.0710  3.1430  2.2900
Au  3.3650 -0.8770 -3.5010
Au  0.4190 -4.4680 -0.1430
Au  0.9600 -1.7150 -0.2210
Au  2.2070  3.7840 -0.2540
Au  0.2050 -1.7090 -4.2570
Au  0.3560  0.0000  1.9920
Au -3.6440  0.8520 -1.7430
Au -3.7160 -1.9520 -1.3910
Au -2.3750 -0.9270 -3.7010
Au  2.2930  0.9590  3.7990
Au  1.6450 -3.5310 -2.4200
Au -1.6980 -0.9590  0.3660
Au -2.3020 -3.7480  0.4190
Au -0.4280  1.6200  4.2270
Au -2.8100  0.7320  2.9360
Au  1.0710  0.9470 -4.1140
Au -2.3870  3.4380 -1.5850
Au  1.6930  0.9780 -0.3430
Au  3.5110 -0.7610  1.6880
Au -4.4010 -0.3230  0.8180
Au  0.3880  3.2040 -2.3200
Au  4.4580  0.3790 -0.6680
Au  2.4410 -3.3960  1.5150
Au -3.7590  2.4140  0.6940
Au  2.9840  2.2310 -2.5450
Au -0.5100  4.5080  0.2400
Au -0.9610 -1.1560  4.2790
Au -1.0000  1.7400  0.2470
Au  3.6070 -2.2670 -0.8660
O  2.2620 -2.4680 -4.2320
O  4.5290  0.7060 -2.8320
C  5.8100  5.6409 -2.7734
C  5.7199  7.0213 -2.5200
C  6.6105  7.9299 -3.0954
C  6.8129  5.1931 -3.6717
C  7.7331  6.0934 -4.2193
C  7.6276  7.4600 -3.9382
O  6.9566  3.8684 -3.9544
H  4.9494  7.3732 -1.8303
H  6.5352  8.9974 -2.8741
H  8.5287  5.6949 -4.8537
H  8.3371  8.1547 -4.3903
C  5.7300  3.0818 -3.8053
C  5.0004  3.3435 -2.5129
C  5.0212  4.6417 -2.0786
H  4.5051  4.9499 -1.1647
H  6.0386  2.0384 -3.8979
H  5.0664  3.3320 -4.6572
C  8.4976  1.9086 -1.2912
C  9.6481  1.3414 -1.8774
C 10.9221  1.8593 -1.6381
C  8.6766  3.0259 -0.4349
C  9.9504  3.5500 -0.1971
C 11.0735  2.9649 -0.7919
O  7.6067  3.6812  0.0940
H  9.5163  0.5034 -2.5660
H 11.7933  1.4271 -2.1336
H 10.0359  4.4368  0.4321
H 12.0663  3.3818 -0.6000
C  6.3748  2.8935  0.2231
C  6.0627  2.0153 -0.9535
C  7.1485  1.4980 -1.6174
H  7.0116  0.8132 -2.4563
H  5.5964  3.6458  0.4029
H  6.4703  2.2648  1.1283
40
AU38O2  -93.62588 eV
Au  3.5870  2.0502  1.5005
Au -3.0096 -2.0874  2.5931
Au -1.6627  1.8116 -3.7226
Au -1.1871 -3.0400 -2.0964
Au -0.3881  0.0082 -1.9475
Au -1.7902  3.3484  2.4911
Au  1.7429 -1.8210  3.7015
Au -0.3708 -3.3112  2.4341
Au  1.0711  3.1427  2.2904
Au  3.3653 -0.8767 -3.5015
Au  0.4186 -4.4682 -0.1428
Au  0.9600 -1.7152 -0.2208
Au  2.2066  3.7842 -0.2537
Au  0.2047 -1.7085 -4.2567
Au  0.3555  0.0004  1.9924
Au -3.6442  0.8516 -1.7429
Au -3.7155 -1.9518 -1.3911
Au -2.3746 -0.9270 -3.7008
Au  2.2935  0.9589  3.7987
Au  1.6452 -3.5306 -2.4197
Au -1.6982 -0.9586  0.3659
Au -2.3021 -3.7478  0.4186
Au -0.4282  1.6198  4.2270
Au -2.8104  0.7324  2.9361
Au  1.0705  0.9473 -4.1139
Au -2.3866  3.4377 -1.5851
Au  1.6932  0.9783 -0.3425
Au  3.5111 -0.7609  1.6877
Au -4.4013 -0.3232  0.8179
Au  0.3882  3.2044 -2.3197
Au  4.4583  0.3785 -0.6675
Au  2.4415 -3.3960  1.5148
Au -3.7591  2.4135  0.6936
Au  2.9844  2.2313 -2.5448
Au -0.5096  4.5083  0.2395
Au -0.9615 -1.1560  4.2790
Au -0.9998  1.7396  0.2470
Au  3.6072 -2.2669 -0.8662
O  2.2618 -2.4682 -4.2320
O  4.5290  0.7057 -2.8316
88
Au38O16-IM8:1+1+      -333.92431 eV  ; -338.04311   eV
Au  3.8010  2.0890  1.1680
Au -2.7460 -2.3460  2.4220
Au -1.8760  2.1280 -3.8460
Au -1.4140 -3.8770 -2.7530
Au -0.4540  0.5130 -1.9290
Au -2.1450  3.6860  2.5290
Au  1.6990 -2.1520  4.3310
Au -0.5070 -4.0540  2.6900
Au  1.1070  3.8480  2.5760
Au  3.3390 -0.7470 -3.4540
Au  0.6310 -4.4940 -0.2790
Au  0.8930 -1.6360 -0.6780
Au  2.4660  3.8300 -0.4340
Au  0.3090 -1.7650 -3.7580
Au  0.7850 -0.3630  1.8790
Au -4.3360  0.9520 -1.6610
Au -4.0290 -1.9770 -1.7420
Au -2.2210 -0.7150 -3.6790
Au  2.7260  1.0900  3.7420
Au  2.0490 -3.6710 -2.3150
Au -1.6550 -0.7960  0.2760
Au -2.4080 -3.5060 -0.0570
Au -0.3700  1.5770  3.5390
Au -3.2920  0.7330  3.5230
Au  1.2360  0.7750 -4.3280
Au -2.1530  3.4770 -1.2730
Au  1.8010  1.0380 -0.3890
Au  4.0890 -1.1150  2.3860
Au -4.3430 -0.3870  1.2950
Au  0.5020  3.7420 -3.1580
Au  4.6370  0.2030 -0.8500
Au  1.9900 -3.0240  1.6050
Au -3.8180  2.2680  0.6580
Au  2.8420  2.4030 -2.7620
Au -0.1570  4.8810  0.0470
Au -0.7420 -1.0770  4.2950
Au -0.7490  1.8650  0.6360
Au  3.6780 -2.4660 -0.6030
O  2.4070 -2.4380 -4.0910
O  4.3850  0.9390 -2.7930
O  0.0650 -3.3440  4.5210
O -1.1360 -4.9250  0.9570
O -3.8400  2.5910  2.8630
O -2.8660 -1.0890  4.2760
O -3.5920  2.5010 -2.7440
O -5.1770 -0.6670 -0.6320
O -0.0210  2.4700 -4.7340
O  0.9520  5.0610 -1.6710
O -0.6080  4.9480  2.0830
O  2.8860  3.0240  3.0710
O  3.2660 -0.8580  4.2870
O  5.0570 -1.2340  0.6020
O  0.1040 -5.1140 -2.3020
O -3.0360 -2.7830 -3.3470
C  7.3188 -1.1493 -5.2205
C  8.1996 -0.3596 -5.9727
C  9.4462 -0.8447 -6.3780
C  7.7167 -2.4566 -4.8635
C  8.9691 -2.9429 -5.2529
C  9.8264 -2.1405 -6.0124
O  6.9353 -3.2812 -4.1107
H  7.8952  0.6599 -6.2237
H 10.1150 -0.2102 -6.9614
H  9.2557 -3.9479 -4.9402
H 10.8015 -2.5331 -6.3062
C  5.5610 -2.8947 -3.7601
C  5.2218 -1.4752 -4.0412
C  6.0282 -0.6667 -4.7456
H  5.7564  0.3693 -4.9610
H  5.4568 -3.1211 -2.6854
H  4.8789 -3.5704 -4.3022
C  8.9277 -0.7368 -1.0634
C  9.7732 -1.8359 -0.8587
C 11.1291 -1.7786 -1.1919
C  9.4716  0.4412 -1.6214
C 10.8279  0.5096 -1.9475
C 11.6538 -0.5998 -1.7325
O  8.7084  1.5656 -1.7836
H  9.3444 -2.7430 -0.4259
H 11.7645 -2.6518 -1.0340
H 11.2175  1.4329 -2.3783
H 12.7095 -0.5419 -2.0044
C  7.2633  1.3891 -1.9490
C  6.7189  0.2392 -1.1640
C  7.5108 -0.7468 -0.7227
H  7.1083 -1.5734 -0.1317
H  7.0376  1.2637 -3.0213
H  6.8334  2.3460 -1.6240
88
Au38O16-IM8:1+d+      -334.22894 eV  ; -338.30296   eV
Au  3.8010  2.0890  1.1680
Au -2.7460 -2.3460  2.4220
Au -1.8760  2.1280 -3.8460
Au -1.4140 -3.8770 -2.7530
Au -0.4540  0.5130 -1.9290
Au -2.1450  3.6860  2.5290
Au  1.6990 -2.1520  4.3310
Au -0.5070 -4.0540  2.6900
Au  1.1070  3.8480  2.5760
Au  3.3390 -0.7470 -3.4540
Au  0.6310 -4.4940 -0.2790
Au  0.8930 -1.6360 -0.6780
Au  2.4660  3.8300 -0.4340
Au  0.3090 -1.7650 -3.7580
Au  0.7850 -0.3630  1.8790
Au -4.3360  0.9520 -1.6610
Au -4.0290 -1.9770 -1.7420
Au -2.2210 -0.7150 -3.6790
Au  2.7260  1.0900  3.7420
Au  2.0490 -3.6710 -2.3150
Au -1.6550 -0.7960  0.2760
Au -2.4080 -3.5060 -0.0570
Au -0.3700  1.5770  3.5390
Au -3.2920  0.7330  3.5230
Au  1.2360  0.7750 -4.3280
Au -2.1530  3.4770 -1.2730
Au  1.8010  1.0380 -0.3890
Au  4.0890 -1.1150  2.3860
Au -4.3430 -0.3870  1.2950
Au  0.5020  3.7420 -3.1580
Au  4.6370  0.2030 -0.8500
Au  1.9900 -3.0240  1.6050
Au -3.8180  2.2680  0.6580
Au  2.8420  2.4030 -2.7620
Au -0.1570  4.8810  0.0470
Au -0.7420 -1.0770  4.2950
Au -0.7490  1.8650  0.6360
Au  3.6780 -2.4660 -0.6030
O  2.4070 -2.4380 -4.0910
O  4.3850  0.9390 -2.7930
O  0.0650 -3.3440  4.5210
O -1.1360 -4.9250  0.9570
O -3.8400  2.5910  2.8630
O -2.8660 -1.0890  4.2760
O -3.5920  2.5010 -2.7440
O -5.1770 -0.6670 -0.6320
O -0.0210  2.4700 -4.7340
O  0.9520  5.0610 -1.6710
O -0.6080  4.9480  2.0830
O  2.8860  3.0240  3.0710
O  3.2660 -0.8580  4.2870
O  5.0570 -1.2340  0.6020
O  0.1040 -5.1140 -2.3020
O -3.0360 -2.7830 -3.3470
C  6.6850 -4.1637 -3.4040
C  6.9128 -4.3121 -4.7812
C  8.1065 -4.8547 -5.2680
C  7.6870 -4.5882 -2.5034
C  8.8791 -5.1398 -2.9852
C  9.0914 -5.2626 -4.3626
O  7.5448 -4.4950 -1.1525
H  6.1306 -3.9877 -5.4729
H  8.2674 -4.9462 -6.3435
H  9.6312 -5.4629 -2.2644
H 10.0346 -5.6813 -4.7211
C  6.3376 -3.8845 -0.5678
C  5.2929 -3.4367 -1.5349
C  5.4594 -3.5822 -2.8646
H  4.7009 -3.2566 -3.5800
H  6.6786 -3.0320  0.0396
H  5.9256 -4.6420  0.1172
C  8.8918  1.0149 -0.0253
C  9.7403  1.2043  1.0761
C 11.0892  1.5366  0.9085
C  9.4277  1.1660 -1.3245
C 10.7755  1.4985 -1.4978
C 11.6011  1.6856 -0.3842
O  8.6888  0.9732 -2.4508
H  9.3245  1.0817  2.0801
H 11.7320  1.6774  1.7794
H 11.1581  1.6000 -2.5139
H 12.6494  1.9527 -0.5365
C  7.2365  0.7545 -2.3676
C  6.7047  0.5677 -0.9898
C  7.4785  0.6647  0.1036
H  7.0770  0.4991  1.1046
H  7.0405 -0.1367 -2.9815
H  6.7477  1.6062 -2.8646
88
Au38O16-TS8:1+1+    -332.90582 eV  ; -337.13525   eV
Au  3.8010  2.0890  1.1680
Au -2.7460 -2.3460  2.4220
Au -1.8760  2.1280 -3.8460
Au -1.4140 -3.8770 -2.7530
Au -0.4540  0.5130 -1.9290
Au -2.1450  3.6860  2.5290
Au  1.6990 -2.1520  4.3310
Au -0.5070 -4.0540  2.6900
Au  1.1070  3.8480  2.5760
Au  3.3390 -0.7470 -3.4540
Au  0.6310 -4.4940 -0.2790
Au  0.8930 -1.6360 -0.6780
Au  2.4660  3.8300 -0.4340
Au  0.3090 -1.7650 -3.7580
Au  0.7850 -0.3630  1.8790
Au -4.3360  0.9520 -1.6610
Au -4.0290 -1.9770 -1.7420
Au -2.2210 -0.7150 -3.6790
Au  2.7260  1.0900  3.7420
Au  2.0490 -3.6710 -2.3150
Au -1.6550 -0.7960  0.2760
Au -2.4080 -3.5060 -0.0570
Au -0.3700  1.5770  3.5390
Au -3.2920  0.7330  3.5230
Au  1.2360  0.7750 -4.3280
Au -2.1530  3.4770 -1.2730
Au  1.8010  1.0380 -0.3890
Au  4.0890 -1.1150  2.3860
Au -4.3430 -0.3870  1.2950
Au  0.5020  3.7420 -3.1580
Au  4.6370  0.2030 -0.8500
Au  1.9900 -3.0240  1.6050
Au -3.8180  2.2680  0.6580
Au  2.8420  2.4030 -2.7620
Au -0.1570  4.8810  0.0470
Au -0.7420 -1.0770  4.2950
Au -0.7490  1.8650  0.6360
Au  3.6780 -2.4660 -0.6030
O  2.4070 -2.4380 -4.0910
O  4.3850  0.9390 -2.7930
O  0.0650 -3.3440  4.5210
O -1.1360 -4.9250  0.9570
O -3.8400  2.5910  2.8630
O -2.8660 -1.0890  4.2760
O -3.5920  2.5010 -2.7440
O -5.1770 -0.6670 -0.6320
O -0.0210  2.4700 -4.7340
O  0.9520  5.0610 -1.6710
O -0.6080  4.9480  2.0830
O  2.8860  3.0240  3.0710
O  3.2660 -0.8580  4.2870
O  5.0570 -1.2340  0.6020
O  0.1040 -5.1140 -2.3020
O -3.0360 -2.7830 -3.3470
C  7.2608 -1.2874 -5.2463
C  8.0792 -0.5955 -6.1685
C  9.2614 -1.1436 -6.6499
C  7.6911 -2.5731 -4.8061
C  8.8779 -3.1274 -5.3006
C  9.6592 -2.4170 -6.2136
O  7.0087 -3.2951 -3.8861
H  7.7874  0.4210 -6.4484
H  9.8857 -0.5753 -7.3437
H  9.1812 -4.1118 -4.9419
H 10.5908 -2.8547 -6.5733
C  5.7293 -2.7831 -3.3746
C  5.5230 -1.3065 -3.5178
C  6.1066 -0.6989 -4.6322
H  5.8024  0.3035 -4.9350
H  5.7001 -3.0940 -2.3206
H  4.9220 -3.3186 -3.8988
C  8.7532 -1.0154 -1.3071
C  9.7153 -2.0160 -1.0615
C 11.0796 -1.7295 -1.1056
C  9.2188  0.2962 -1.5851
C 10.5806  0.5845 -1.6435
C 11.5133 -0.4322 -1.4191
O  8.3152  1.3042 -1.7602
H  9.3673 -3.0293 -0.8543
H 11.8089 -2.5244 -0.9250
H 10.8925  1.5968 -1.9071
H 12.5794 -0.2160 -1.4970
C  7.1295  0.8947 -2.4852
C  6.4839 -0.3739 -1.9391
C  7.3286 -1.2516 -1.3083
H  6.9552 -2.1622 -0.8353
H  7.4377  0.7463 -3.5331
H  6.4449  1.7452 -2.4415
88
Au38O16-TS8:1+d+    -333.11136 eV  ; -337.28632   eV
Au  3.8010  2.0890  1.1680
Au -2.7460 -2.3460  2.4220
Au -1.8760  2.1280 -3.8460
Au -1.4140 -3.8770 -2.7530
Au -0.4540  0.5130 -1.9290
Au -2.1450  3.6860  2.5290
Au  1.6990 -2.1520  4.3310
Au -0.5070 -4.0540  2.6900
Au  1.1070  3.8480  2.5760
Au  3.3390 -0.7470 -3.4540
Au  0.6310 -4.4940 -0.2790
Au  0.8930 -1.6360 -0.6780
Au  2.4660  3.8300 -0.4340
Au  0.3090 -1.7650 -3.7580
Au  0.7850 -0.3630  1.8790
Au -4.3360  0.9520 -1.6610
Au -4.0290 -1.9770 -1.7420
Au -2.2210 -0.7150 -3.6790
Au  2.7260  1.0900  3.7420
Au  2.0490 -3.6710 -2.3150
Au -1.6550 -0.7960  0.2760
Au -2.4080 -3.5060 -0.0570
Au -0.3700  1.5770  3.5390
Au -3.2920  0.7330  3.5230
Au  1.2360  0.7750 -4.3280
Au -2.1530  3.4770 -1.2730
Au  1.8010  1.0380 -0.3890
Au  4.0890 -1.1150  2.3860
Au -4.3430 -0.3870  1.2950
Au  0.5020  3.7420 -3.1580
Au  4.6370  0.2030 -0.8500
Au  1.9900 -3.0240  1.6050
Au -3.8180  2.2680  0.6580
Au  2.8420  2.4030 -2.7620
Au -0.1570  4.8810  0.0470
Au -0.7420 -1.0770  4.2950
Au -0.7490  1.8650  0.6360
Au  3.6780 -2.4660 -0.6030
O  2.4070 -2.4380 -4.0910
O  4.3850  0.9390 -2.7930
O  0.0650 -3.3440  4.5210
O -1.1360 -4.9250  0.9570
O -3.8400  2.5910  2.8630
O -2.8660 -1.0890  4.2760
O -3.5920  2.5010 -2.7440
O -5.1770 -0.6670 -0.6320
O -0.0210  2.4700 -4.7340
O  0.9520  5.0610 -1.6710
O -0.6080  4.9480  2.0830
O  2.8860  3.0240  3.0710
O  3.2660 -0.8580  4.2870
O  5.0570 -1.2340  0.6020
O  0.1040 -5.1140 -2.3020
O -3.0360 -2.7830 -3.3470
C  6.8825 -4.0172 -3.3305
C  6.9457 -4.4809 -4.6578
C  7.8775 -5.4441 -5.0428
C  7.8154 -4.5426 -2.3942
C  8.7695 -5.4883 -2.7851
C  8.7933 -5.9421 -4.1082
O  7.8280 -4.0925 -1.1065
H  6.2410 -4.0737 -5.3858
H  7.8897 -5.8026 -6.0727
H  9.4722 -5.8775 -2.0465
H  9.5204 -6.7005 -4.4025
C  6.5343 -3.6271 -0.5972
C  5.7817 -2.7490 -1.5528
C  5.9511 -3.0001 -2.8842
H  5.4000 -2.4385 -3.6495
H  6.7745 -3.1288  0.3454
H  5.9121 -4.5164 -0.3789
C  8.7499  0.2028 -0.4125
C  9.5007  0.6354  0.6977
C 10.7231  1.2854  0.5307
C  9.2681  0.4342 -1.7059
C 10.5058  1.0619 -1.8774
C 11.2273  1.4952 -0.7583
O  8.5982 -0.0061 -2.8080
H  9.0955  0.4593  1.6987
H 11.2823  1.6302  1.4039
H 10.8825  1.2162 -2.8895
H 12.1791  2.0153 -0.9030
C  7.1379 -0.0658 -2.7102
C  6.6408 -0.5657 -1.3837
C  7.4547 -0.4257 -0.2959
H  7.0988 -0.6851  0.7002
H  6.8453 -0.7123 -3.5425
H  6.7215  0.9342 -2.9074
54
AU38O16  -146.12049
Au  3.8010  2.0893  1.1683
Au -2.7461 -2.3465  2.4217
Au -1.8764  2.1281 -3.8459
Au -1.4142 -3.8770 -2.7528
Au -0.4545  0.5131 -1.9292
Au -2.1451  3.6862  2.5286
Au  1.6993 -2.1522  4.3313
Au -0.5070 -4.0542  2.6897
Au  1.1068  3.8478  2.5765
Au  3.3395 -0.7471 -3.4543
Au  0.6311 -4.4937 -0.2790
Au  0.8932 -1.6364 -0.6784
Au  2.4655  3.8304 -0.4336
Au  0.3090 -1.7655 -3.7580
Au  0.7849 -0.3632  1.8794
Au -4.3358  0.9522 -1.6613
Au -4.0293 -1.9767 -1.7415
Au -2.2211 -0.7149 -3.6786
Au  2.7260  1.0904  3.7416
Au  2.0493 -3.6707 -2.3146
Au -1.6551 -0.7964  0.2756
Au -2.4085 -3.5064 -0.0568
Au -0.3702  1.5770  3.5392
Au -3.2924  0.7328  3.5228
Au  1.2360  0.7750 -4.3280
Au -2.1532  3.4765 -1.2729
Au  1.8006  1.0378 -0.3892
Au  4.0889 -1.1152  2.3863
Au -4.3433 -0.3867  1.2952
Au  0.5019  3.7420 -3.1584
Au  4.6366  0.2030 -0.8504
Au  1.9903 -3.0245  1.6046
Au -3.8181  2.2683  0.6582
Au  2.8415  2.4029 -2.7622
Au -0.1567  4.8814  0.0469
Au -0.7421 -1.0775  4.2948
Au -0.7493  1.8647  0.6358
Au  3.6778 -2.4655 -0.6026
O  2.4065 -2.4375 -4.0906
O  4.3847  0.9389 -2.7926
O  0.0646 -3.3436  4.5213
O -1.1362 -4.9251  0.9570
O -3.8397  2.5909  2.8627
O -2.8659 -1.0887  4.2762
O -3.5924  2.5009 -2.7441
O -5.1772 -0.6669 -0.6324
O -0.0215  2.4699 -4.7337
O  0.9519  5.0605 -1.6712
O -0.6082  4.9484  2.0827
O  2.8865  3.0242  3.0707
O  3.2663 -0.8578  4.2874
O  5.0566 -1.2341  0.6021
O  0.1035 -5.1137 -2.3023
O -3.0362 -2.7827 -3.3469
18
Sub-F   -93.30576  eV;   -93.5754 eV
C          6.09970       -6.32450        0.50070
C          5.64640       -7.21220        1.47050
C          6.40960       -7.39690        2.62230
C          7.30600       -5.62770        0.68130
C          8.05920       -5.82730        1.84630
C          7.60300       -6.72120        2.82430
O          7.64170       -4.77130       -0.34090
H          5.53060       -6.15330       -0.41340
H          4.71260       -7.75940        1.34320
H          8.99530       -5.29760        2.01490
H          8.17150       -6.88820        3.73940
C          8.87450       -4.04580       -0.19770
C          9.06390       -3.20300       -1.36720
C          9.22850       -2.48400       -2.32890
H          9.39040       -1.91930       -3.22410
H          9.71880       -4.75050       -0.09680
H          8.84230       -3.42270        0.71360
F          5.96670       -8.26730        3.57650
56
IM1-F   -178.59009 eV;   -178.86047 eV
Au        18.91730        2.23780        1.41940
Au        12.16560       -2.16490        2.55860
Au        13.06700        2.21300       -3.49970
Au        13.84060       -2.68230       -2.16070
Au        14.66600        0.38110       -1.91100
Au        13.42920        3.38950        2.78350
Au        16.93680       -1.86580        3.54640
Au        14.80870       -3.26840        2.22580
Au        16.27880        3.15540        2.36370
Au        17.55570       -0.36030       -2.89220
Au        15.43590       -4.33900       -0.37670
Au        16.04660       -1.54180       -0.32350
Au        17.34380        4.01580       -0.13910
Au        15.16150       -1.22780       -4.25970
Au        15.31230       -0.11450        1.96320
Au        11.54400        1.02140       -1.35500
Au        11.11220       -1.89930       -1.36890
Au        12.45100       -0.56940       -3.55090
Au        17.54470        0.89450        3.52090
Au        16.65370       -3.07680       -2.66530
Au        13.26220       -0.93060        0.15200
Au        12.74650       -3.74850        0.30180
Au        14.91230        1.50060        4.30800
Au        12.49160        0.65910        3.03660
Au        15.77780        1.56730       -4.21440
Au        12.51920        3.73880       -1.13540
Au        16.70510        1.20990       -0.11090
Au        18.58050       -0.72350        1.46160
Au        10.63650       -0.27860        1.09750
Au        15.22760        3.40090       -1.99020
Au        19.40760        0.62520       -0.91050
Au        17.55250       -3.42370        1.25730
Au        11.30720        2.48310        1.13020
Au        17.86330        2.43270       -2.44810
Au        14.64380        4.67970        0.54490
Au        14.23930       -1.29800        4.30000
Au        14.00750        1.84600        0.43010
Au        18.78980       -2.17770       -1.00350
C          6.14910       -6.28830        0.45800
C          5.65440       -7.17450        1.40990
C          6.37800       -7.37230        2.58470
C          7.35560       -5.60800        0.68450
C          8.07330       -5.82130        1.86870
C          7.57570       -6.71460        2.82670
O          7.74230       -4.75010       -0.32660
H          5.61320       -6.11060       -0.47540
H          4.71640       -7.70530        1.24930
H          9.01630       -5.31260        2.06740
H          8.11640       -6.89190        3.75640
C          8.97870       -4.05760       -0.12810
C          9.20130       -3.18360       -1.28000
C          9.16480       -2.52890       -2.33460
H          8.85360       -2.10260       -3.27230
H          9.82410       -4.76500       -0.03470
H          8.95250       -3.44660        0.79170
F          5.89520       -8.23810        3.51860
56
IM2-F   -178.67391 eV;   -178.99352  eV
Au        19.05510        2.10770        0.69240
Au        12.31180       -1.43980        3.34150
Au        12.79720        1.45170       -3.51660
Au        13.45910       -3.11910       -1.20950
Au        14.46270       -0.11170       -1.73810
Au        13.83750        3.94220        2.22490
Au        17.18670       -1.23690        3.83090
Au        14.86150       -2.68510        2.95880
Au        16.60100        3.43300        1.63220
Au        17.18830       -1.23180       -2.80010
Au        15.16430       -4.42950        0.70230
Au        15.88870       -1.72820        0.10600
Au        17.41920        3.64010       -1.08710
Au        14.64750       -2.22090       -3.70200
Au        15.44200        0.22510        2.05260
Au        11.44880        0.86690       -1.03280
Au        10.75800       -1.98810       -0.30420
Au        12.09780       -1.23290       -2.83170
Au        17.88470        1.39980        3.16450
Au        16.21370       -3.77370       -1.88790
Au        13.16330       -0.84960        0.64560
Au        12.55290       -3.56500        1.49580
Au        15.37350        2.33320        4.00570
Au        12.81570        1.38560        3.14670
Au        15.37980        0.48990       -4.34740
Au        12.53200        3.51740       -1.55420
Au        16.69210        0.94480       -0.38700
Au        18.71020       -0.70860        1.43560
Au        10.67620        0.18070        1.69340
Au        15.12470        2.83960       -2.59390
Au        19.27100        0.03810       -1.27450
Au        17.49550       -3.28480        1.88400
Au        11.51040        2.83190        1.03850
Au        17.65410        1.58080       -3.02130
Au        14.85530        4.65220       -0.34100
Au        14.58280       -0.35750        4.68220
Au        14.10210        1.89280        0.23550
Au        18.54450       -2.65530       -0.68360
C          6.62580       -3.14690       -1.56070
C          5.68840       -2.69530       -2.62610
C          5.19750       -3.58480       -3.52740
C          6.95660       -4.60270       -1.62220
C          6.43120       -5.45740       -2.58870
C          5.53530       -4.96230       -3.53490
O          7.81880       -5.08740       -0.73150
H          6.14710       -2.96200       -0.56900
H          5.39280       -1.64690       -2.66020
H          6.74130       -6.50300       -2.59920
H          5.09980       -5.60680       -4.29720
C          8.55360       -4.10060        0.09290
C          8.91240       -2.86020       -0.66320
C          7.97690       -2.38380       -1.49490
H          8.08870       -1.51110       -2.13820
H          9.41580       -4.66460        0.45990
H          7.90230       -3.85470        0.95180
F          4.32800       -3.16550       -4.48880
56
IM3-F   -179.20807 eV;   -179.43457 eV 
Au        19.07150        2.26320        0.29780
Au        12.37060       -0.95140        3.30500
Au        12.65030        1.79390       -3.60410
Au        13.09170       -2.76140       -1.30840
Au        14.30090        0.16760       -1.91620
Au        14.06770        4.27830        2.07000
Au        17.21110       -0.92330        3.51140
Au        14.81860       -2.33680        2.82110
Au        16.79140        3.71070        1.37090
Au        16.96920       -1.00800       -3.15850
Au        14.89650       -4.06480        0.51020
Au        15.72210       -1.40050       -0.04890
Au        17.43970        3.84770       -1.42460
Au        14.23040       -1.86040       -3.90470
Au        15.48140        0.65260        1.83470
Au        11.37460        1.38860       -1.08020
Au        10.50370       -1.39840       -0.34350
Au        11.76060       -0.83530       -2.83020
Au        18.06550        1.66990        2.85050
Au        15.81570       -3.38770       -2.10540
Au        13.09400       -0.43800        0.53710
Au        12.39790       -3.08650        1.48160
Au        15.61670        2.68940        3.84240
Au        12.91250        1.85610        3.10150
Au        15.15330        0.77900       -4.53800
Au        12.54870        3.94890       -1.66890
Au        16.63120        1.19560       -0.69550
Au        18.65700       -0.50730        1.06590
Au        10.73780        0.65030        1.62210
Au        15.05940        3.15530       -2.82820
Au        19.19410        0.23970       -1.65250
Au        17.34740       -3.03490        1.59360
Au        11.61970        3.31780        1.02790
Au        17.52610        1.78000       -3.36420
Au        14.97720        4.95320       -0.52520
Au        14.72440        0.05830        4.49290
Au        14.10260        2.24950        0.01300
Au        18.26160       -2.39930       -1.05280
C          7.07210       -2.87350       -2.18550
C          6.29660       -2.53040       -3.30130
C          5.90120       -3.51790       -4.19360
C          7.44060       -4.21590       -1.99940
C          7.04090       -5.19610       -2.91980
C          6.26400       -4.85100       -4.02380
O          8.21780       -4.65050       -0.95440
H          6.76690       -1.57860       -0.49820
H          6.01510       -1.49050       -3.48010
H          7.35740       -6.22800       -2.75870
H          5.94220       -5.60320       -4.74480
C          8.52570       -3.67270        0.08560
C          8.75140       -2.30610       -0.46290
C          7.57530       -1.80720       -1.22510
H          7.78250       -0.87410       -1.76280
H          9.39500       -4.08450        0.60910
H          7.66650       -3.64650        0.78830
F          5.14530       -3.16860       -5.27310
56
IM4-F   -180.53383 eV;   -180.82705 eV
Au        19.11480        2.16420        0.59240
Au        12.35280       -1.41010        3.38840
Au        12.69540        1.43620       -3.44420
Au        13.39850       -3.08950       -1.16310
Au        14.47940       -0.10190       -1.74170
Au        13.88720        3.90600        2.20150
Au        17.14390       -1.23180        3.78160
Au        14.84460       -2.83980        3.17430
Au        16.68890        3.57580        1.64860
Au        17.15990       -1.30430       -2.92270
Au        15.11560       -4.41010        0.73750
Au        15.84890       -1.72650        0.14120
Au        17.38430        3.62240       -1.10780
Au        14.52750       -2.19960       -3.67300
Au        15.39090        0.24860        2.06600
Au        11.21470        0.90310       -1.03690
Au        10.78480       -2.00700       -0.23610
Au        11.98220       -1.19990       -2.75050
Au        17.88610        1.40500        3.02940
Au        16.09990       -3.77030       -1.90010
Au        13.15110       -0.80050        0.64920
Au        12.57940       -3.51520        1.58070
Au        15.44570        2.36940        4.00360
Au        12.86910        1.39610        3.15040
Au        15.27200        0.48260       -4.37670
Au        12.48010        3.52580       -1.51440
Au        16.69620        0.94600       -0.32930
Au        18.56420       -0.72500        1.34330
Au        10.68720        0.20530        1.72240
Au        15.06190        2.79470       -2.54400
Au        19.20760       -0.01400       -1.33570
Au        17.43900       -3.34010        1.91680
Au        11.50410        2.83510        1.06430
Au        17.54920        1.51920       -3.01780
Au        14.85970        4.67510       -0.33230
Au        14.61750       -0.34330        4.71620
Au        14.08550        1.89930        0.19440
Au        18.43060       -2.70640       -0.72290
C          8.34860       -3.53710       -1.96010
C          7.73830       -3.16770       -3.17230
C          7.65200       -4.09780       -4.19840
C          8.86050       -4.84850       -1.82070
C          8.77620       -5.76270       -2.87260
C          8.16350       -5.38890       -4.07130
O          9.52010       -5.23200       -0.68050
H          8.66880       -2.56260        1.31220
H          7.34020       -2.16090       -3.30940
H          9.18610       -6.76450       -2.73960
H          8.06970       -6.09310       -4.89960
C          9.07030       -4.60630        0.53970
C          8.87540       -3.12320        0.39890
C          8.46300       -2.63070       -0.83390
H          8.06620       -1.61930       -0.93040
H          9.83670       -4.84780        1.28660
H          8.11380       -5.07160        0.85440
F          7.04850       -3.74190       -5.36300
55
IM5-F   -180.86881 eV;   -181.91545 eV
Au        19.06520        2.51910        0.57600
Au        12.35510       -1.10170        3.20640
Au        12.85760        1.80630       -3.66000
Au        13.57090       -2.76280       -1.33730
Au        14.51160        0.25110       -1.86500
Au        13.84010        4.31810        2.09180
Au        17.23690       -0.83810        3.70300
Au        14.92660       -2.30330        2.81170
Au        16.60980        3.82680        1.50430
Au        17.26620       -0.83460       -2.92330
Au        15.26580       -4.06980        0.57440
Au        15.95120       -1.35330       -0.02560
Au        17.43610        4.03840       -1.21640
Au        14.74520       -1.85440       -3.83730
Au        15.48740        0.60440        1.91120
Au        11.52810        1.20830       -1.16880
Au        10.83430       -1.67530       -0.48780
Au        12.18650       -0.89510       -2.97920
Au        17.91000        1.80310        3.04620
Au        16.32980       -3.39550       -2.01870
Au        13.21240       -0.50570        0.51990
Au        12.63520       -3.23680        1.36990
Au        15.38620        2.71620        3.87290
Au        12.84660        1.73050        2.97970
Au        15.44820        0.86510       -4.47710
Au        12.56060        3.87800       -1.70250
Au        16.72440        1.32900       -0.53210
Au        18.79010       -0.30130        1.32380
Au        10.71260        0.49720        1.53110
Au        15.16010        3.22990       -2.73790
Au        19.33290        0.46090       -1.39210
Au        17.57490       -2.88310        1.75890
Au        11.52520        3.18350        0.89460
Au        17.70130        1.98580       -3.14880
Au        14.86150        5.03300       -0.47430
Au        14.61540        0.01720        4.53730
Au        14.13310        2.26340        0.10350
Au        18.63250       -2.23750       -0.80150
C          7.09760       -2.98490       -2.41460
C          6.13650       -2.49550       -3.31600
C          5.09170       -3.31530       -3.72520
C          6.96950       -4.31160       -1.94210
C          5.91290       -5.11910       -2.37500
C          4.95980       -4.62300       -3.27330
O          7.84290       -4.85860       -1.04880
H          6.21240       -1.47370       -3.69350
H          5.84410       -6.14050       -1.99930
H          4.13220       -5.24590       -3.61610
C          9.02580       -4.09650       -0.61740
C          9.14980       -2.68860       -1.11240
C          8.22700       -2.18370       -1.96100
H          8.30540       -1.16420       -2.34320
H          9.90350       -4.68620       -0.93210
H          8.99780       -4.11530        0.48340
F          4.16390       -2.81910       -4.60300
73
IM6-F   -274.73884 eV;   -276.04781 eV
Au        18.79690        3.01150        1.18540
Au        12.70600       -1.85260        2.83300
Au        13.07980        1.32520       -3.51730
Au        14.39900       -3.28330       -1.21500
Au        15.01660        0.23110       -1.72210
Au        13.21550        3.71270        2.28700
Au        17.18740       -0.76940        4.03210
Au        15.38590       -2.79790        3.10950
Au        16.07800        3.83310        1.98050
Au        18.00100       -0.60690       -2.80900
Au        16.23310       -4.28730        0.74510
Au        16.18190       -1.46640        0.19290
Au        16.98210        4.07560       -0.71330
Au        15.51420       -1.87760       -3.50700
Au        15.26370        0.25170        2.13650
Au        11.29650        0.66360       -1.34870
Au        11.58430       -3.01110       -0.54140
Au        12.81420       -1.36390       -2.62250
Au        17.54380        1.92460        3.47530
Au        17.27310       -3.24860       -1.77320
Au        13.27970       -0.88060        0.26270
Au        13.50680       -4.11580        1.45440
Au        14.83750        2.29060        4.12750
Au        12.56190        0.97880        2.86820
Au        15.86090        0.83260       -4.35390
Au        12.28820        3.38120       -1.65800
Au        16.83740        1.30990        0.07150
Au        18.96680        0.13220        1.82620
Au        10.67970       -0.51370        1.17050
Au        15.00700        3.14020       -2.49440
Au        19.52830        1.11720       -0.91250
Au        18.04480       -2.56840        2.05410
Au        11.17280        2.40740        0.79070
Au        17.66650        2.18190       -2.67400
Au        14.28770        4.76130       -0.14090
Au        14.38770       -0.52900        4.68550
Au        14.04600        1.95230        0.22380
Au        19.06440       -1.60180       -0.36770
C          8.64280       -5.46020       -2.67200
C          7.77050       -5.34690       -3.76710
C          7.10240       -6.47370       -4.23120
C          8.81760       -6.73300       -2.07720
C          8.12770       -7.84930       -2.55630
C          7.25730       -7.72450       -3.64680
O          9.60340       -6.88580       -0.96640
H          7.61110       -4.38220       -4.25120
H          8.27680       -8.81250       -2.06610
H          6.71080       -8.58160       -4.03910
C         10.69020       -5.92180       -0.79830
C         10.35230       -4.51360       -1.20020
C          9.36700       -4.32720       -2.10960
H          9.11200       -3.33260       -2.48240
H         11.56640       -6.27200       -1.37930
H         10.94610       -5.99360        0.26560
C          8.95840       -1.17070        2.43750
C          8.46740       -0.57270        1.45480
H          9.04940       -1.72090        3.35780
C          7.51460       -0.02110        0.49300
H          7.56100        1.08130        0.52100
O          6.19670       -0.49390        0.83570
H          7.78810       -0.34700       -0.52400
C          5.19480       -0.23050       -0.06740
C          5.32350        0.61390       -1.18010
C          3.97040       -0.87170        0.18920
C          2.88270       -0.67330       -0.65750
C          3.03140        0.16980       -1.75670
C          4.22980        0.81190       -2.03280
H          4.30970        1.46380       -2.90320
H          1.92930       -1.17090       -0.48160
H          3.89660       -1.53320        1.05410
H          6.26100        1.12380       -1.40030
F          1.96470        0.36100       -2.59090
F          6.25520       -6.34360       -5.30220
73
IM7-F   -274.62264 eV;   -275.94465 eV
Au        18.81800        2.88440        0.81960
Au        12.43050       -1.62450        2.87220
Au        13.11050        1.60360       -3.88000
Au        13.95760       -2.81330       -1.47600
Au        14.69300        0.07750       -1.99060
Au        13.45650        3.98700        1.95160
Au        17.13540       -0.72600        3.63050
Au        15.14110       -2.60110        2.83680
Au        16.29990        4.05430        1.69380
Au        17.76630       -0.56210       -3.07150
Au        15.64460       -4.11640        0.43410
Au        16.00300       -1.33320        0.04020
Au        17.13850        4.15490       -1.03310
Au        15.33490       -1.76350       -4.07970
Au        15.39970        0.67300        1.82020
Au        11.60370        0.77740       -1.57960
Au        11.17810       -2.15570       -1.06800
Au        12.61490       -1.17250       -3.42440
Au        17.61600        1.99840        3.18610
Au        16.75610       -3.10380       -2.05590
Au        13.18770       -0.66150        0.34920
Au        13.06950       -3.96440        1.53170
Au        14.93640        2.58980        3.87510
Au        12.63710        1.24120        2.60930
Au        15.80940        1.00890       -4.51200
Au        12.41740        3.59760       -1.96650
Au        16.76300        1.35050       -0.55720
Au        18.79370        0.04650        1.44020
Au        10.51670       -0.15880        1.06550
Au        15.14920        3.27630       -2.79990
Au        19.51280        0.94880       -1.20810
Au        17.81170       -2.70410        1.71700
Au        11.37420        2.66670        0.52380
Au        17.82920        2.30100       -3.05030
Au        14.49040        4.97860       -0.48280
Au        14.43820       -0.23620        4.32030
Au        14.10990        2.14410       -0.16590
Au        18.84250       -1.76860       -0.73960
C          8.73470       -5.05250       -3.30030
C          7.93560       -5.12630       -4.45370
C          7.47130       -6.36110       -4.88910
C          9.04060       -6.25380       -2.61750
C          8.55680       -7.48330       -3.06930
C          7.76210       -7.54520       -4.22060
O          9.75870       -6.23210       -1.45190
H          7.67380       -4.22570       -5.00990
H          8.80800       -8.38450       -2.50830
H          7.37840       -8.49320       -4.59700
C         10.70730       -5.13410       -1.31030
C         10.20210       -3.80580       -1.79890
C          9.25440       -3.79930       -2.76710
H          8.88480       -2.86790       -3.20280
H         11.64120       -5.39470       -1.84890
H         10.94190       -5.11850       -0.23680
C          7.76170       -1.10890        1.91140
C          8.45720       -0.15880        1.27210
H          8.19660       -1.97990        2.40050
C          7.65280        0.91510        0.60710
H          7.31670        1.66160        1.35080
O          6.43710        0.40330       -0.06640
H          8.18740        1.43540       -0.19310
C          5.82300       -0.63750        0.50620
C          6.21180       -0.99910        1.90500
C          4.89810       -1.36480       -0.23480
C          4.27290       -2.48320        0.32460
C          4.61280       -2.87310        1.64180
C          5.50500       -2.20660        2.42340
H          5.72440       -2.55380        3.43260
H          3.56260       -3.08400       -0.24080
H          4.69940       -1.06890       -1.26570
H          5.97600       -0.12510        2.55850
F          3.99120       -3.99040        2.13130
F          6.69630       -6.41420       -6.02250
72
IM8-F   -274.86404 eV;   -278.53611 eV
Au        18.97380        2.51740        0.55690
Au        12.40780       -1.13590        3.28220
Au        12.77480        1.81030       -3.74750
Au        13.46940       -2.64210       -1.33840
Au        14.37980        0.28790       -1.89440
Au        13.82390        4.31530        2.06030
Au        17.13930       -0.86700        3.67720
Au        14.89940       -2.60370        3.14070
Au        16.63830        3.97220        1.55070
Au        17.31840       -0.88870       -3.19460
Au        15.17290       -4.07620        0.56570
Au        15.70840       -1.34780       -0.00010
Au        17.32710        3.97980       -1.20870
Au        14.65320       -1.77690       -3.86030
Au        15.43850        0.64620        1.88570
Au        11.36000        1.24510       -1.26910
Au        10.79110       -1.72250       -0.54780
Au        12.05540       -0.84850       -3.06610
Au        17.82970        1.80880        3.03740
Au        16.17470       -3.32850       -2.06990
Au        12.99180       -0.30790        0.56680
Au        12.69150       -3.11510        1.39890
Au        15.32350        2.76350        3.86140
Au        12.84580        1.66200        2.80200
Au        15.40900        0.86320       -4.55160
Au        12.47770        3.88460       -1.76470
Au        16.66250        1.25260       -0.58660
Au        18.59280       -0.27510        1.26030
Au        10.44730        0.43580        1.53710
Au        15.08360        3.14060       -2.70580
Au        19.29830        0.45700       -1.46010
Au        17.42710       -2.87700        1.73890
Au        11.50190        3.17620        0.80630
Au        17.62810        1.95300       -3.19130
Au        14.81340        5.09270       -0.49470
Au        14.61350        0.02630        4.51550
Au        14.12990        2.32580        0.02380
Au        18.38120       -2.14850       -0.84400
C          8.20500       -4.24430       -3.06510
C          7.57870       -4.19920       -4.32100
C          7.10210       -5.37060       -4.89750
C          8.31690       -5.49950       -2.41690
C          7.83290       -6.66290       -3.01710
C          7.21830       -6.60720       -4.27540
O          8.83990       -5.58930       -1.15780
H          7.46260       -3.25100       -4.84870
H          7.94760       -7.61160       -2.49070
H          6.84930       -7.50420       -4.77270
C          9.83610       -4.57680       -0.79540
C          9.58040       -3.20000       -1.33400
C          8.77200       -3.07080       -2.41430
H          8.59060       -2.09670       -2.87570
H         10.83240       -4.92530       -1.13450
H          9.83860       -4.58980        0.30140
C          7.70540       -0.20490        2.69490
C          8.40930        0.55650        1.82210
H          8.20620       -0.88350        3.39030
C          7.64600        1.41070        0.85180
H          8.13050        2.38170        0.69300
O          6.28270        1.76010        1.26650
H          7.59400        0.89760       -0.12850
C          5.58000        0.79300        1.92750
C          6.24890       -0.19670        2.68910
C          4.18520        0.85260        1.89570
C          3.41980       -0.07930        2.61090
C          4.08440       -1.05140        3.34760
C          5.47130       -1.12550        3.40130
H          5.94930       -1.90490        3.99730
H          2.33030       -0.06090        2.59300
H          3.70440        1.63300        1.30420
F          3.34060       -1.97640        4.05000
F          6.49780       -5.30450       -6.13550
56
TS1/2-F -178.10899 eV;   -178.43383 eV 
Au        19.01180        2.11000        0.68400
Au        12.26270       -1.45910        3.34530
Au        12.75840        1.42040       -3.51950
Au        13.41700       -3.16430       -1.22450
Au        14.42930       -0.13320       -1.74240
Au        13.78940        3.91910        2.20780
Au        17.13960       -1.24480        3.82070
Au        14.81020       -2.71160        2.95370
Au        16.55080        3.41910        1.61740
Au        17.15260       -1.25240       -2.80810
Au        15.11440       -4.45630        0.70790
Au        15.84780       -1.75000        0.10260
Au        17.38850        3.61930       -1.09300
Au        14.60620       -2.24080       -3.70370
Au        15.39130        0.20820        2.04440
Au        11.38520        0.83110       -1.04860
Au        10.78460       -2.07420       -0.30010
Au        12.05560       -1.25540       -2.84760
Au        17.84380        1.38790        3.14790
Au        16.16940       -3.78990       -1.88500
Au        13.13650       -0.86700        0.65430
Au        12.48340       -3.58840        1.47560
Au        15.32770        2.31500        3.99170
Au        12.76380        1.36450        3.13300
Au        15.33970        0.46240       -4.35620
Au        12.49070        3.48850       -1.56220
Au        16.65370        0.92980       -0.39460
Au        18.66350       -0.71360        1.42680
Au        10.63080        0.14000        1.67360
Au        15.08590        2.82100       -2.60320
Au        19.23210        0.02680       -1.28730
Au        17.45190       -3.30070        1.88240
Au        11.45860        2.80490        1.02390
Au        17.61410        1.55680       -3.03880
Au        14.81220        4.63830       -0.35790
Au        14.53820       -0.36890        4.67300
Au        14.05730        1.87460        0.22160
Au        18.49780       -2.67000       -0.68420
C          6.20950       -3.27230       -1.56690
C          5.34430       -2.82890       -2.59760
C          5.02250       -3.69460       -3.62420
C          6.71830       -4.59710       -1.61610
C          6.34810       -5.45850       -2.66200
C          5.48740       -5.01600       -3.66190
O          7.58830       -5.08840       -0.69880
H          6.20180       -2.73190       -0.62030
H          4.92150       -1.82500       -2.58430
H          6.75210       -6.47020       -2.67590
H          5.17070       -5.67470       -4.47250
C          8.42320       -4.17270        0.05870
C          8.88780       -2.99320       -0.73380
C          8.23670       -2.34540       -1.61820
H          8.17620       -1.56290       -2.35920
H          9.25080       -4.79890        0.40910
H          7.86590       -3.79580        0.93440
F          4.20670       -3.26600       -4.62410
56
TS2/3-F -177.67664 eV;   -178.08539 eV
Au        19.06960        2.00090        0.55830
Au        12.33950       -1.38710        3.42880
Au        12.66630        1.47040       -3.42740
Au        13.24290       -3.09650       -1.14630
Au        14.35280       -0.13390       -1.72630
Au        13.95130        3.92720        2.27990
Au        17.19010       -1.28400        3.74070
Au        14.82920       -2.70870        2.98110
Au        16.68610        3.38300        1.60010
Au        17.01670       -1.28730       -2.89060
Au        15.00560       -4.44590        0.68250
Au        15.77130       -1.74960        0.10880
Au        17.39110        3.57010       -1.15540
Au        14.37490       -2.20620       -3.69730
Au        15.42910        0.24380        2.04320
Au        11.35540        0.97030       -0.92140
Au        10.62260       -1.83690       -0.08400
Au        11.87310       -1.18250       -2.69540
Au        17.96740        1.32850        3.07300
Au        15.96750       -3.77010       -1.92730
Au        13.10320       -0.81160        0.70610
Au        12.46450       -3.53800        1.60580
Au        15.51310        2.31840        4.03530
Au        12.87600        1.44410        3.25490
Au        15.19880        0.47460       -4.35600
Au        12.50490        3.57340       -1.46310
Au        16.64270        0.89020       -0.43970
Au        18.64450       -0.79930        1.30460
Au        10.69670        0.28700        1.82030
Au        15.04780        2.82860       -2.59350
Au        19.20140       -0.03940       -1.40550
Au        17.40010       -3.36020        1.79620
Au        11.54980        2.92060        1.17690
Au        17.53480        1.51510       -3.10360
Au        14.88680        4.63970       -0.30320
Au        14.65950       -0.34570        4.69780
Au        14.08620        1.89990        0.23550
Au        18.36410       -2.71490       -0.81510
C          6.84340       -3.19330       -1.84630
C          5.93450       -2.78120       -2.87410
C          5.44060       -3.72950       -3.74340
C          7.14540       -4.58950       -1.70290
C          6.63880       -5.50650       -2.63130
C          5.78620       -5.08580       -3.65430
O          8.02210       -5.03150       -0.77920
H          6.61650       -2.56870       -0.75760
H          5.66610       -1.73180       -2.98970
H          6.93320       -6.55340       -2.54160
H          5.41020       -5.78660       -4.39650
C          8.49350       -4.06950        0.23010
C          8.80270       -2.72050       -0.35180
C          7.86020       -2.22300       -1.21810
H          7.83180       -1.20530       -1.60180
H          9.37250       -4.55340        0.66580
H          7.70950       -3.97480        1.00550
F          4.58940       -3.34500       -4.73330
56
TS3/4-F -178.48771 eV;   -178.8912  eV
Au        19.09800        2.25380        0.19350
Au        12.29490       -0.88660        3.28320
Au        12.54140        1.85050       -3.50640
Au        13.06580       -2.68710       -1.18010
Au        14.25570        0.24790       -1.84160
Au        14.11350        4.37620        2.03930
Au        17.16390       -0.96710        3.45790
Au        14.74250       -2.36310        2.85660
Au        16.80460        3.74030        1.28790
Au        16.84360       -1.06250       -3.14270
Au        14.82770       -4.14280        0.56840
Au        15.65130       -1.44050       -0.06720
Au        17.43460        3.83910       -1.47460
Au        14.11130       -1.84720       -3.75300
Au        15.43740        0.62640        1.80620
Au        11.19690        1.50590       -0.96940
Au        10.55000       -1.39290        0.06070
Au        11.69130       -0.70920       -2.63980
Au        18.02620        1.61480        2.73690
Au        15.72330       -3.48490       -2.08470
Au        13.02270       -0.30730        0.61030
Au        12.35300       -3.11930        1.54950
Au        15.64880        2.71010        3.76670
Au        12.99230        1.90490        2.99620
Au        15.03000        0.76770       -4.51570
Au        12.51510        4.01020       -1.63420
Au        16.62850        1.16980       -0.69110
Au        18.53520       -0.54970        0.96460
Au        10.62530        0.90900        1.77550
Au        15.01140        3.13230       -2.79490
Au        19.11520        0.13200       -1.75360
Au        17.26230       -3.09200        1.57620
Au        11.59800        3.49920        1.04640
Au        17.44840        1.72850       -3.38350
Au        14.97400        5.03500       -0.59320
Au        14.69310        0.05510        4.47650
Au        14.11290        2.34590        0.04270
Au        18.18300       -2.51480       -1.07850
C          7.17090       -2.90400       -2.22850
C          6.33000       -2.53670       -3.29950
C          5.91460       -3.51670       -4.18870
C          7.52150       -4.26490       -2.05790
C          7.11450       -5.22570       -2.99250
C          6.31220       -4.85020       -4.06610
O          8.34340       -4.67190       -1.05080
H          7.66440       -1.60730       -0.28940
H          6.05140       -1.49660       -3.46860
H          7.45540       -6.25270       -2.87270
H          6.00050       -5.57560       -4.81850
C          8.44690       -3.74190        0.06380
C          8.80900       -2.35390       -0.40880
C          7.95680       -1.93080       -1.47740
H          8.11140       -0.93800       -1.91580
H          9.21160       -4.16000        0.72260
H          7.48120       -3.73890        0.60180
F          5.13210       -3.16600       -5.24510
73
TS6/7-F -274.06184 eV;   -275.43248 eV
Au        18.77470        2.87290        0.83810
Au        12.37860       -1.63000        2.86810
Au        13.04960        1.60440       -3.84530
Au        13.91080       -2.81350       -1.47820
Au        14.64520        0.08140       -1.97760
Au        13.39910        3.97370        1.97990
Au        17.08370       -0.74990        3.64270
Au        15.09010       -2.62580        2.86410
Au        16.25440        4.03730        1.72450
Au        17.71110       -0.56160       -3.06530
Au        15.58550       -4.12380        0.44300
Au        15.96440       -1.33960        0.04840
Au        17.08580        4.14360       -1.00770
Au        15.27940       -1.76430       -4.07070
Au        15.34600        0.66220        1.83750
Au        11.51860        0.78270       -1.56520
Au        11.11890       -2.15590       -1.05350
Au        12.55380       -1.16140       -3.40780
Au        17.57180        1.97420        3.20480
Au        16.70360       -3.11190       -2.05290
Au        13.16500       -0.68250        0.34890
Au        13.01780       -3.98860        1.56140
Au        14.89050        2.56880        3.89770
Au        12.59340        1.23530        2.63930
Au        15.75310        1.01040       -4.49250
Au        12.36040        3.59890       -1.93070
Au        16.72000        1.33760       -0.53910
Au        18.73050        0.03160        1.44840
Au        10.50670       -0.09860        1.04340
Au        15.09820        3.26540       -2.77510
Au        19.46600        0.93970       -1.20110
Au        17.75440       -2.72870        1.72790
Au        11.29400        2.66280        0.55470
Au        17.78910        2.30050       -3.03490
Au        14.44220        4.96480       -0.45130
Au        14.39010       -0.26250        4.34220
Au        14.06670        2.14620       -0.14480
Au        18.77980       -1.76920       -0.72890
C          8.64410       -5.03740       -3.27880
C          7.83430       -5.09760       -4.42660
C          7.36740       -6.32750       -4.87400
C          8.96120       -6.24570       -2.61470
C          8.47490       -7.46960       -3.07890
C          7.66770       -7.51910       -4.22310
O          9.68900       -6.23750       -1.45490
H          7.56970       -4.18760       -4.96760
H          8.73480       -8.37700       -2.53300
H          7.28260       -8.46450       -4.60630
C         10.63100       -5.13360       -1.29960
C         10.12160       -3.80240       -1.77520
C          9.16620       -3.78930       -2.73620
H          8.79500       -2.85360       -3.16080
H         11.56790       -5.38520       -1.83720
H         10.86380       -5.12760       -0.22540
C          8.00540       -1.19760        1.85440
C          8.37510       -0.13750        1.24660
H          8.24100       -2.16340        2.27620
C          7.50420        0.94200        0.68850
H          7.25650        1.64650        1.50240
O          6.28210        0.43870        0.07570
H          7.99730        1.49860       -0.11370
C          5.64760       -0.62170        0.64570
C          5.78310       -0.94260        2.02160
C          4.86390       -1.42940       -0.19310
C          4.21780       -2.55700        0.31410
C          4.38740       -2.87910        1.66570
C          5.13280       -2.09370        2.52510
H          5.24260       -2.37790        3.57210
H          3.57200       -3.17400       -0.31550
H          4.78150       -1.16380       -1.24770
H          6.11800       -0.18200        2.72730
F          3.76670       -3.99400        2.15230
F          6.58080       -6.36670       -5.99910
72
TS8-F   -273.49068 eV;   -277.22696 eV
Au        18.72820        2.58400        0.84190
Au        12.12660       -1.67540        2.70070
Au        12.73930        1.85730       -3.71410
Au        13.53910       -2.77530       -1.60890
Au        14.42400        0.30260       -1.99290
Au        13.26510        3.92570        2.10140
Au        16.80400       -1.13390        3.57440
Au        14.74220       -2.99730        2.80630
Au        16.20460        3.84190        1.81880
Au        17.41890       -0.65960       -3.26910
Au        15.24870       -4.20800        0.17800
Au        15.77270       -1.40260       -0.18410
Au        17.09220        4.08980       -0.91230
Au        14.74780       -1.60960       -4.01380
Au        15.18200        0.41590        1.79730
Au        10.79360        1.36160       -1.75280
Au        10.92180       -2.26870       -0.65560
Au        12.05600       -0.82050       -3.01090
Au        17.40660        1.65880        3.17100
Au        16.33580       -3.21160       -2.34120
Au        12.99040       -0.59300        0.24150
Au        12.63100       -3.81800        1.04850
Au        14.74580        2.32310        3.85960
Au        12.38840        1.15520        2.52610
Au        15.43930        1.11840       -4.50900
Au        12.27510        3.88300       -1.71500
Au        16.51520        1.34320       -0.46980
Au        18.33360       -0.29000        1.29080
Au        10.21210        0.11400        0.79860
Au        14.95510        3.26820       -2.57320
Au        19.19670        0.66870       -1.27980
Au        17.35630       -2.99620        1.55180
Au        11.05920        2.82800        0.64890
Au        17.57710        2.17990       -3.00630
Au        14.48450        4.96500       -0.24690
Au        14.13050       -0.49700        4.24420
Au        13.81770        2.15650       -0.01830
Au        18.47560       -2.03220       -0.96620
C          7.63700       -3.56160       -2.39450
C          7.54550       -3.79210       -3.78130
C          6.92350       -4.94550       -4.23640
C          7.07680       -4.52040       -1.50680
C          6.42790       -5.65110       -1.99540
C          6.35070       -5.87980       -3.37710
O          7.15100       -4.32130       -0.15260
H          7.99260       -3.08970       -4.48750
H          6.01320       -6.36120       -1.27920
H          5.88260       -6.77840       -3.78250
C          8.43820       -3.75010        0.24400
C          8.81750       -2.51870       -0.52830
C          8.35090       -2.44520       -1.82560
H          8.60820       -1.59560       -2.46500
H          9.21860       -4.51990        0.09860
H          8.34090       -3.56200        1.31780
C          7.71220       -1.11590        1.73010
C          8.23380       -0.64670        0.54440
H          8.32790       -1.71950        2.40140
C          7.33840        0.24980       -0.26780
H          7.52030        1.29450        0.04860
O          5.90870       -0.03090       -0.10930
H          7.51220        0.18700       -1.34820
C          5.51890       -0.13930        1.20050
C          6.38520       -0.74540        2.15390
C          4.25690        0.31800        1.57130
C          3.80800        0.17290        2.89370
C          4.64870       -0.45430        3.80920
C          5.91240       -0.91860        3.47210
H          6.53740       -1.40250        4.22810
H          2.83900        0.55550        3.21840
H          3.64270        0.81510        0.81620
F          4.20630       -0.61070        5.10670
F          6.87990       -5.18280       -5.59250
18
Pr-F    -95.25168  eV;   -95.45246  eV
C          8.26070       -3.56810       -1.93490
C          7.67470       -3.19430       -3.15440
C          7.65020       -4.10240       -4.20410
C          8.80310       -4.86690       -1.80660
C          8.79020       -5.75340       -2.88430
C          8.20520       -5.37290       -4.09600
O          9.44140       -5.26150       -0.65610
H          8.92560       -2.48710        1.25670
H          7.24750       -2.20000       -3.28620
H          9.23770       -6.73930       -2.76180
H          8.17310       -6.05120       -4.94760
C          9.01550       -4.60880        0.56270
C          8.79610       -3.13620        0.38950
C          8.40210       -2.66080       -0.80530
H          8.19940       -1.59940       -0.95840
H          9.81270       -4.82150        1.28590
H          8.09100       -5.10170        0.92600
F          7.07170       -3.73120       -5.38500
34
Prd-F   -185.83174 eV;   -186.18075 eV
C          7.42630       -3.47890       -2.48060
C          7.82450       -3.36680       -3.82610
C          8.17410       -4.50870       -4.52910
C          7.40750       -4.76200       -1.88480
C          7.74220       -5.89960       -2.61770
C          8.13380       -5.77760       -3.95360
O          6.96100       -4.92430       -0.59910
H          7.84870       -2.39530       -4.31980
H          7.69540       -6.87440       -2.13310
H          8.41290       -6.64800       -4.54590
C          7.14600       -3.79380        0.27720
C          6.75460       -2.47460       -0.35210
C          6.95540       -2.36020       -1.69810
H          6.76490       -1.42450       -2.22480
H          8.20340       -3.76410        0.60600
H          6.52300       -4.02810        1.14730
C          6.28290       -1.44390        1.85530
C          6.31310       -1.38600        0.49180
H          6.56800       -2.34830        2.39310
C          5.97570       -0.05130       -0.13670
H          6.89610        0.54820       -0.28220
O          5.02620        0.72140        0.62490
H          5.49290       -0.17820       -1.11170
C          5.24100        0.77180        1.97780
C          5.87460       -0.30300        2.64190
C          4.73600        1.86080        2.68820
C          4.88200        1.91270        4.07680
C          5.52690        0.86180        4.72360
C          6.01410       -0.24190        4.04100
H          6.49640       -1.05140        4.58960
H          4.51060        2.75640        4.65690
H          4.23400        2.66100        2.14510
F          5.67610        0.91670        6.07960
F          8.56350       -4.38890       -5.83180
18
Sub-Cl   -91.65048    eV    ; -91.91998   eV
C          6.10610       -6.32000        0.50340
C          5.64880       -7.21120        1.46610
C          6.39740       -7.41380        2.63040
C          7.30900       -5.62220        0.69170
C          8.05510       -5.82920        1.85890
C          7.59270       -6.72920        2.82720
O          7.64660       -4.76750       -0.32870
H          5.54130       -6.14770       -0.41320
H          4.71340       -7.74960        1.31740
H          8.99410       -5.30660        2.03530
H          8.17060       -6.89450        3.73650
C          8.87350       -4.03120       -0.19090
C          9.05880       -3.20880       -1.37660
C          9.23630       -2.52160       -2.35970
H          9.39280       -1.91470       -3.22820
H          9.72360       -4.72780       -0.07750
H          8.83360       -3.39300        0.71030
Cl         5.82520       -8.53540        3.84250
56
IM1-Cl   -176.97021    eV   ; -177.23637  eV 
Au        18.91610        2.23690        1.41960
Au        12.16620       -2.16490        2.55880
Au        13.06700        2.21150       -3.49900
Au        13.84070       -2.68440       -2.16090
Au        14.66610        0.38050       -1.91000
Au        13.42910        3.38980        2.78370
Au        16.93740       -1.86550        3.54680
Au        14.80900       -3.26660        2.22470
Au        16.27780        3.15410        2.36280
Au        17.55590       -0.36030       -2.89210
Au        15.43650       -4.33910       -0.37620
Au        16.04640       -1.54240       -0.32320
Au        17.34350        4.01590       -0.13960
Au        15.16080       -1.22800       -4.25840
Au        15.31230       -0.11480        1.96260
Au        11.54380        1.02200       -1.35440
Au        11.11160       -1.89810       -1.37150
Au        12.45130       -0.57040       -3.55040
Au        17.54430        0.89430        3.52160
Au        16.65400       -3.07690       -2.66520
Au        13.26150       -0.93140        0.15110
Au        12.74560       -3.74830        0.30130
Au        14.91210        1.50030        4.30810
Au        12.49170        0.65950        3.03630
Au        15.77740        1.56660       -4.21320
Au        12.51960        3.73850       -1.13560
Au        16.70490        1.20990       -0.11130
Au        18.58140       -0.72320        1.46220
Au        10.63680       -0.27930        1.09770
Au        15.22740        3.40110       -1.99060
Au        19.40740        0.62560       -0.91070
Au        17.55370       -3.42280        1.25770
Au        11.30700        2.48360        1.13100
Au        17.86310        2.43300       -2.44860
Au        14.64380        4.67930        0.54440
Au        14.23970       -1.29750        4.29960
Au        14.00660        1.84520        0.43060
Au        18.78990       -2.17730       -1.00370
C          6.15150       -6.28820        0.46130
C          5.65620       -7.17440        1.41210
C          6.37120       -7.38490        2.59730
C          7.35640       -5.60680        0.68310
C          8.06910       -5.82250        1.86830
C          7.57210       -6.71540        2.82530
O          7.74290       -4.75020       -0.32610
H          5.61630       -6.11130       -0.47080
H          4.71600       -7.69780        1.23680
H          9.01100       -5.31580        2.06720
H          8.12630       -6.88190        3.74950
C          8.97960       -4.05750       -0.12800
C          9.20150       -3.18300       -1.27930
C          9.16500       -2.52780       -2.33350
H          8.85190       -2.10220       -3.27140
H          9.82360       -4.76530       -0.03540
H          8.95310       -3.44800        0.79180
Cl         5.75380       -8.49450        3.79640
56
TS1/2-Cl -176.47268   eV    ; -176.79321  eV
Au        19.00590        2.10510        0.68540
Au        12.25740       -1.45800        3.33960
Au        12.75710        1.42480       -3.52490
Au        13.41360       -3.16300       -1.22990
Au        14.42660       -0.12990       -1.74640
Au        13.78500        3.92100        2.20750
Au        17.13520       -1.25160        3.82310
Au        14.80520       -2.70810        2.94450
Au        16.54390        3.41460        1.61800
Au        17.14840       -1.25080       -2.81110
Au        15.10900       -4.45510        0.70040
Au        15.84630       -1.74860        0.09860
Au        17.38420        3.61870       -1.09140
Au        14.60300       -2.23670       -3.71000
Au        15.39230        0.20850        2.04340
Au        11.39220        0.83250       -1.04780
Au        10.78000       -2.06630       -0.28590
Au        12.05380       -1.25330       -2.84430
Au        17.83910        1.38350        3.15130
Au        16.16480       -3.78860       -1.89060
Au        13.13940       -0.86750        0.65270
Au        12.48390       -3.59450        1.47490
Au        15.32230        2.31330        3.99280
Au        12.76150        1.36710        3.13200
Au        15.33820        0.46710       -4.36160
Au        12.48610        3.49200       -1.56760
Au        16.64930        0.93020       -0.39700
Au        18.66180       -0.71720        1.42770
Au        10.63070        0.14980        1.67420
Au        15.08320        2.82350       -2.60440
Au        19.22710        0.02540       -1.28800
Au        17.44730       -3.30200        1.87960
Au        11.45610        2.81030        1.01830
Au        17.61090        1.55780       -3.03950
Au        14.80830        4.64000       -0.35920
Au        14.53240       -0.37350        4.67090
Au        14.05560        1.87670        0.22000
Au        18.49420       -2.67120       -0.68650
C          6.24390       -3.27200       -1.57040
C          5.37160       -2.82830       -2.59840
C          5.02080       -3.68130       -3.63300
C          6.73880       -4.60350       -1.62580
C          6.35290       -5.46100       -2.66710
C          5.48000       -5.01120       -3.65250
O          7.61560       -5.09790       -0.72120
H          6.20930       -2.74870       -0.61130
H          4.96880       -1.82040       -2.56390
H          6.73350       -6.48050       -2.68510
H          5.15640       -5.67860       -4.45100
C          8.42170       -4.17920        0.06720
C          8.89440       -2.98310       -0.70420
C          8.23160       -2.35480       -1.60520
H          8.20420       -1.54140       -2.31890
H          9.24850       -4.79980        0.42920
H          7.83590       -3.84100        0.93630
Cl         3.96610       -3.12600       -4.90610
56
IM2-Cl   -177.0352     eV   ; -177.34435  eV 
Au        19.05580        2.10790        0.69270
Au        12.31240       -1.44120        3.34260
Au        12.79720        1.45150       -3.51690
Au        13.45850       -3.11890       -1.21020
Au        14.46310       -0.11240       -1.73810
Au        13.83780        3.94260        2.22440
Au        17.18730       -1.23740        3.83150
Au        14.86210       -2.68450        2.95760
Au        16.60060        3.43240        1.63160
Au        17.18810       -1.23200       -2.79860
Au        15.16460       -4.42870        0.70250
Au        15.88950       -1.72830        0.10690
Au        17.41920        3.64010       -1.08740
Au        14.64840       -2.22200       -3.70200
Au        15.44240        0.22460        2.05320
Au        11.44840        0.86680       -1.03410
Au        10.75650       -1.98530       -0.30620
Au        12.09890       -1.23300       -2.83500
Au        17.88400        1.39950        3.16420
Au        16.21380       -3.77420       -1.88730
Au        13.16310       -0.84900        0.64520
Au        12.55210       -3.56350        1.49430
Au        15.37290        2.33310        4.00590
Au        12.81660        1.38480        3.14670
Au        15.37990        0.48890       -4.34670
Au        12.53150        3.51720       -1.55400
Au        16.69210        0.94540       -0.38680
Au        18.71110       -0.70840        1.43580
Au        10.67760        0.18050        1.69450
Au        15.12400        2.83830       -2.59220
Au        19.27070        0.03850       -1.27420
Au        17.49710       -3.28490        1.88440
Au        11.51070        2.83170        1.03860
Au        17.65410        1.58090       -3.02170
Au        14.85480        4.65300       -0.34140
Au        14.58260       -0.35830        4.68310
Au        14.10200        1.89260        0.23620
Au        18.54520       -2.65560       -0.68320
C          6.62520       -3.15220       -1.56320
C          5.68680       -2.70260       -2.62620
C          5.18320       -3.57970       -3.54010
C          6.95760       -4.60480       -1.62140
C          6.43140       -5.45250       -2.59130
C          5.53250       -4.96080       -3.53620
O          7.82020       -5.08820       -0.73040
H          6.14610       -2.96200       -0.57500
H          5.40690       -1.64770       -2.64770
H          6.74190       -6.49580       -2.60240
H          5.10830       -5.62650       -4.28990
C          8.55300       -4.09800        0.09390
C          8.90790       -2.85750       -0.66420
C          7.97290       -2.38430       -1.49810
H          8.08540       -1.51130       -2.14050
H          9.41610       -4.66180        0.46000
H          7.90170       -3.85420        0.95340
Cl         4.06960       -3.01970       -4.76440
56
TS2/3-Cl -176.05195    eV   ; -176.45314  eV    
Au        19.06910        2.00000        0.55590
Au        12.34040       -1.38740        3.42900
Au        12.66360        1.47170       -3.42610
Au        13.24100       -3.09570       -1.14630
Au        14.35070       -0.13330       -1.72620
Au        13.95210        3.92680        2.28170
Au        17.19050       -1.28600        3.73850
Au        14.82930       -2.71050        2.98060
Au        16.68620        3.38190        1.59990
Au        17.01370       -1.28710       -2.89270
Au        15.00400       -4.44630        0.68090
Au        15.77000       -1.75000        0.10740
Au        17.38960        3.56990       -1.15610
Au        14.37100       -2.20490       -3.69780
Au        15.42900        0.24330        2.04260
Au        11.35440        0.97120       -0.91900
Au        10.62280       -1.83680       -0.08040
Au        11.87020       -1.18080       -2.69390
Au        17.96810        1.32650        3.07120
Au        15.96440       -3.76980       -1.92950
Au        13.10340       -0.81110        0.70700
Au        12.46390       -3.53860        1.60650
Au        15.51490        2.31720        4.03580
Au        12.87690        1.44410        3.25680
Au        15.19550        0.47580       -4.35660
Au        12.50360        3.57440       -1.46120
Au        16.64140        0.88970       -0.44070
Au        18.64350       -0.80070        1.30170
Au        10.69700        0.28810        1.82290
Au        15.04550        2.82910       -2.59290
Au        19.19930       -0.04020       -1.40870
Au        17.39910       -3.36170        1.79340
Au        11.55010        2.92130        1.17920
Au        17.53200        1.51530       -3.10460
Au        14.88610        4.64000       -0.30180
Au        14.66090       -0.34720        4.69720
Au        14.08570        1.90020        0.23590
Au        18.36210       -2.71580       -0.81830
C          6.84160       -3.19370       -1.84360
C          5.93490       -2.78430       -2.87150
C          5.43420       -3.72250       -3.75570
C          7.14770       -4.59030       -1.70050
C          6.63770       -5.50380       -2.63190
C          5.78620       -5.08330       -3.65160
O          8.02170       -5.03040       -0.77860
H          6.61410       -2.56520       -0.75800
H          5.67230       -1.73070       -2.97360
H          6.93110       -6.55120       -2.54450
H          5.41140       -5.79480       -4.38550
C          8.49420       -4.06700        0.23170
C          8.80140       -2.71880       -0.35060
C          7.86120       -2.22330       -1.21670
H          7.83530       -1.20530       -1.60120
H          9.37370       -4.55290        0.66510
H          7.71120       -3.97320        1.00630
Cl         4.36200       -3.21870       -5.03910
56
IM3-Cl   -177.59735    eV   ; -177.8189   eV 
Au        19.07130        2.26320        0.29790
Au        12.37040       -0.95210        3.30500
Au        12.65060        1.79400       -3.60440
Au        13.09190       -2.76110       -1.30830
Au        14.30060        0.16780       -1.91630
Au        14.06730        4.27830        2.06990
Au        17.21110       -0.92350        3.51160
Au        14.81870       -2.33690        2.82100
Au        16.79130        3.71070        1.37100
Au        16.96950       -1.00800       -3.15840
Au        14.89670       -4.06470        0.51010
Au        15.72250       -1.40070       -0.04930
Au        17.43950        3.84780       -1.42440
Au        14.23130       -1.86060       -3.90480
Au        15.48150        0.65220        1.83450
Au        11.37480        1.38830       -1.08070
Au        10.50330       -1.39730       -0.34540
Au        11.76140       -0.83560       -2.83180
Au        18.06520        1.66990        2.85070
Au        15.81610       -3.38800       -2.10540
Au        13.09420       -0.43840        0.53700
Au        12.39790       -3.08670        1.48140
Au        15.61620        2.68930        3.84220
Au        12.91250        1.85550        3.10090
Au        15.15350        0.77900       -4.53800
Au        12.54850        3.94860       -1.66890
Au        16.63100        1.19580       -0.69570
Au        18.65670       -0.50730        1.06590
Au        10.73770        0.64960        1.62160
Au        15.05950        3.15520       -2.82800
Au        19.19410        0.23950       -1.65230
Au        17.34750       -3.03480        1.59370
Au        11.61940        3.31740        1.02760
Au        17.52620        1.78000       -3.36440
Au        14.97700        4.95340       -0.52520
Au        14.72420        0.05820        4.49260
Au        14.10250        2.24940        0.01330
Au        18.26190       -2.39960       -1.05280
C          7.07090       -2.87520       -2.18740
C          6.29660       -2.53320       -3.30210
C          5.89150       -3.51390       -4.20630
C          7.44170       -4.21660       -1.99960
C          7.04150       -5.19420       -2.92140
C          6.26440       -4.84910       -4.02310
O          8.21650       -4.64940       -0.95420
H          6.76620       -1.57840       -0.49740
H          6.02330       -1.48830       -3.46860
H          7.35710       -6.22440       -2.76130
H          5.94790       -5.61120       -4.73660
C          8.52530       -3.67050        0.08660
C          8.74960       -2.30520       -0.46350
C          7.57260       -1.80850       -1.22720
H          7.78010       -0.87310       -1.76240
H          9.39380       -4.08390        0.60880
H          7.66590       -3.64830        0.78770
Cl         4.92570       -3.06220       -5.59230
56
TS3/4-Cl -176.88218   eV    ; -177.27669  eV
Au        19.10280        2.25770        0.17430
Au        12.30050       -0.86860        3.29690
Au        12.53660        1.86860       -3.47300
Au        13.07010       -2.70050       -1.17060
Au        14.26650        0.26150       -1.82540
Au        14.12260        4.38030        2.03920
Au        17.16990       -0.95490        3.45690
Au        14.74730       -2.34340        2.85820
Au        16.82010        3.75170        1.28120
Au        16.85040       -1.06890       -3.13270
Au        14.82510       -4.15200        0.58170
Au        15.65490       -1.44280       -0.06490
Au        17.44510        3.84920       -1.48700
Au        14.12500       -1.84660       -3.72360
Au        15.44130        0.62980        1.81040
Au        11.17110        1.52740       -0.95710
Au        10.55990       -1.40300        0.05700
Au        11.70960       -0.69390       -2.60970
Au        18.03620        1.62200        2.72180
Au        15.73500       -3.50020       -2.06820
Au        13.02330       -0.29790        0.61740
Au        12.36000       -3.10420        1.56110
Au        15.65990        2.71620        3.76160
Au        12.99640        1.90980        2.99370
Au        15.01870        0.77350       -4.49670
Au        12.51710        4.02850       -1.60310
Au        16.63970        1.17230       -0.68200
Au        18.53780       -0.55000        0.95900
Au        10.62070        0.90390        1.77010
Au        15.01010        3.15060       -2.78970
Au        19.12460        0.13000       -1.76240
Au        17.25750       -3.08990        1.57890
Au        11.58900        3.50880        1.06730
Au        17.44090        1.72570       -3.37550
Au        14.99050        5.04540       -0.58940
Au        14.70130        0.07150        4.49090
Au        14.11760        2.35700        0.05370
Au        18.19500       -2.51850       -1.07340
C          7.19570       -2.91680       -2.26490
C          6.33810       -2.55220       -3.31770
C          5.86500       -3.52420       -4.19300
C          7.53030       -4.27970       -2.08570
C          7.08230       -5.23960       -2.99870
C          6.25940       -4.86280       -4.05460
O          8.35460       -4.68590       -1.08310
H          7.67620       -1.61660       -0.32330
H          6.07480       -1.50490       -3.47270
H          7.40570       -6.27410       -2.87850
H          5.91940       -5.60140       -4.77800
C          8.45650       -3.75170        0.03430
C          8.81960       -2.36100       -0.42800
C          7.98280       -1.94310       -1.51220
H          8.13760       -0.94910       -1.94830
H          9.21560       -4.17500        0.69650
H          7.48320       -3.74190        0.56110
Cl         4.83890       -3.06420       -5.52670
56
IM4-Cl   -178.90971    eV  ;  -179.19713 eV 
Au        19.11470        2.16480        0.59220
Au        12.35230       -1.41040        3.38830
Au        12.69540        1.43650       -3.44440
Au        13.39880       -3.08940       -1.16360
Au        14.47930       -0.10190       -1.74210
Au        13.88720        3.90600        2.20100
Au        17.14420       -1.23180        3.78180
Au        14.84430       -2.83930        3.17410
Au        16.68890        3.57630        1.64870
Au        17.15990       -1.30440       -2.92180
Au        15.11570       -4.40920        0.73750
Au        15.84940       -1.72620        0.14140
Au        17.38430        3.62310       -1.10760
Au        14.52820       -2.19970       -3.67360
Au        15.39090        0.24830        2.06610
Au        11.21570        0.90280       -1.03660
Au        10.78440       -2.00610       -0.23580
Au        11.98250       -1.20010       -2.75040
Au        17.88620        1.40500        3.02890
Au        16.10000       -3.77050       -1.90000
Au        13.15140       -0.80100        0.64910
Au        12.57900       -3.51540        1.58010
Au        15.44600        2.36940        4.00320
Au        12.86960        1.39580        3.15000
Au        15.27190        0.48270       -4.37670
Au        12.48010        3.52590       -1.51460
Au        16.69600        0.94670       -0.32930
Au        18.56390       -0.72530        1.34350
Au        10.68730        0.20520        1.72270
Au        15.06190        2.79530       -2.54410
Au        19.20730       -0.01420       -1.33490
Au        17.43930       -3.34060        1.91750
Au        11.50440        2.83480        1.06410
Au        17.54890        1.51910       -3.01740
Au        14.85970        4.67570       -0.33250
Au        14.61730       -0.34350        4.71610
Au        14.08560        1.89930        0.19430
Au        18.43070       -2.70710       -0.72230
C          8.34850       -3.53830       -1.96260
C          7.73890       -3.17100       -3.17360
C          7.64410       -4.09380       -4.21260
C          8.86080       -4.84870       -1.82160
C          8.77580       -5.75990       -2.87500
C          8.16180       -5.38710       -4.07140
O          9.51750       -5.23430       -0.68150
H          8.66760       -2.56220        1.31180
H          7.34610       -2.16030       -3.29630
H          9.18350       -6.76040       -2.74050
H          8.07520       -6.10240       -4.89130
C          9.07070       -4.60610        0.53950
C          8.87500       -3.12270        0.39700
C          8.46180       -2.63190       -0.83710
H          8.06550       -1.61970       -0.93000
H          9.83780       -4.84770        1.28590
H          8.11480       -5.07190        0.85450
Cl         6.86790       -3.63050       -5.70630
55
IM5-Cl   -179.27355    eV   ; -180.30768  eV
Au        19.06480        2.51910        0.57600
Au        12.35550       -1.10210        3.20670
Au        12.85820        1.80620       -3.65960
Au        13.57060       -2.76300       -1.33660
Au        14.51140        0.25060       -1.86470
Au        13.84050        4.31850        2.09200
Au        17.23740       -0.83770        3.70260
Au        14.92680       -2.30320        2.81190
Au        16.60950        3.82640        1.50410
Au        17.26610       -0.83480       -2.92310
Au        15.26580       -4.07000        0.57470
Au        15.95110       -1.35370       -0.02540
Au        17.43600        4.03820       -1.21670
Au        14.74480       -1.85480       -3.83670
Au        15.48720        0.60410        1.91110
Au        11.52800        1.20860       -1.16900
Au        10.83490       -1.67160       -0.48690
Au        12.18680       -0.89540       -2.98040
Au        17.91030        1.80320        3.04610
Au        16.32990       -3.39570       -2.01870
Au        13.21200       -0.50610        0.51940
Au        12.63500       -3.23670        1.37040
Au        15.38660        2.71620        3.87290
Au        12.84730        1.73030        2.97950
Au        15.44810        0.86460       -4.47660
Au        12.56080        3.87790       -1.70230
Au        16.72400        1.32900       -0.53220
Au        18.79050       -0.30120        1.32380
Au        10.71310        0.49730        1.53160
Au        15.16010        3.22990       -2.73750
Au        19.33250        0.46100       -1.39200
Au        17.57490       -2.88300        1.75890
Au        11.52590        3.18370        0.89510
Au        17.70110        1.98550       -3.14890
Au        14.86130        5.03300       -0.47420
Au        14.61600        0.01750        4.53720
Au        14.13290        2.26300        0.10410
Au        18.63270       -2.23740       -0.80130
C          7.09510       -2.98610       -2.41580
C          6.13490       -2.49720       -3.31480
C          5.08090       -3.30990       -3.73550
C          6.96960       -4.31210       -1.94170
C          5.91200       -5.11710       -2.37650
C          4.96060       -4.62210       -3.27400
O          7.84350       -4.85690       -1.05180
H          6.22180       -1.47420       -3.68530
H          5.84350       -6.13770       -2.00240
H          4.13840       -5.25670       -3.60810
C          9.02670       -4.09380       -0.61780
C          9.14750       -2.68720       -1.11440
C          8.22420       -2.18390       -1.96350
H          8.30520       -1.16360       -2.34490
H          9.90170       -4.68690       -0.93210
H          8.99580       -4.11650        0.48250
Cl         3.89110       -2.67060       -4.86120
73
IM6-Cl   -271.5212    eV    ; -272.80954  eV
Au        18.79840        3.01110        1.18400
Au        12.70560       -1.85270        2.83300
Au        13.07950        1.32610       -3.51630
Au        14.39930       -3.28440       -1.21600
Au        15.01660        0.23140       -1.72190
Au        13.21560        3.71320        2.28730
Au        17.18680       -0.76950        4.03140
Au        15.38490       -2.79740        3.10970
Au        16.07820        3.83330        1.97980
Au        18.00040       -0.60770       -2.80810
Au        16.23310       -4.28730        0.74590
Au        16.18060       -1.46720        0.19370
Au        16.98250        4.07490       -0.71330
Au        15.51330       -1.87730       -3.50700
Au        15.26320        0.25230        2.13630
Au        11.29740        0.66450       -1.34700
Au        11.58470       -3.01060       -0.54210
Au        12.81420       -1.36280       -2.62260
Au        17.54460        1.92510        3.47450
Au        17.27230       -3.24900       -1.77340
Au        13.27960       -0.88070        0.26260
Au        13.50650       -4.11520        1.45330
Au        14.83770        2.29080        4.12640
Au        12.56030        0.97910        2.86780
Au        15.86080        0.83270       -4.35390
Au        12.28900        3.38240       -1.65680
Au        16.83770        1.30960        0.07080
Au        18.96720        0.13210        1.82650
Au        10.67930       -0.51440        1.17060
Au        15.00750        3.14050       -2.49420
Au        19.52880        1.11660       -0.91230
Au        18.04500       -2.56900        2.05420
Au        11.17190        2.40900        0.79110
Au        17.66730        2.18140       -2.67460
Au        14.28830        4.76260       -0.14090
Au        14.38660       -0.52700        4.68500
Au        14.04590        1.95290        0.22460
Au        19.06370       -1.60230       -0.36710
C          8.64240       -5.46180       -2.67370
C          7.77020       -5.34970       -3.76820
C          7.09090       -6.47200       -4.24680
C          8.81720       -6.73320       -2.07770
C          8.12510       -7.84720       -2.55750
C          7.25670       -7.72220       -3.64730
O          9.60560       -6.88930       -0.97250
H          7.62170       -4.37590       -4.24070
H          8.27460       -8.80960       -2.06910
H          6.71810       -8.59060       -4.02800
C         10.69010       -5.92090       -0.79870
C         10.35020       -4.51440       -1.20250
C          9.36590       -4.32920       -2.11250
H          9.11280       -3.33370       -2.48230
H         11.56640       -6.27240       -1.37800
H         10.94340       -5.99560        0.26590
C          8.95770       -1.16920        2.43890
C          8.46670       -0.57180        1.45590
H          9.04890       -1.71910        3.35970
C          7.51570       -0.01990        0.49240
H          7.56090        1.08200        0.52090
O          6.19570       -0.49430        0.83350
H          7.78960       -0.34650       -0.52350
C          5.19440       -0.23130       -0.06750
C          5.31990        0.61230       -1.17960
C          3.96990       -0.87010        0.18660
C          2.88370       -0.67260       -0.66020
C          3.01610        0.17210       -1.76830
C          4.22710        0.81000       -2.03060
H          4.32570        1.46620       -2.89640
H          1.93680       -1.17830       -0.46780
H          3.89550       -1.53050        1.05010
H          6.25530        1.12160       -1.40090
Cl         1.65260        0.41750       -2.83930
Cl         6.00480       -6.30280       -5.61640
73
TS6/7-Cl -270.83429   eV    ; -272.17917  eV
Au        18.80940        2.88270        0.82430
Au        12.41860       -1.62630        2.86380
Au        13.09370        1.60050       -3.86600
Au        13.95350       -2.81200       -1.48260
Au        14.68540        0.08180       -1.99000
Au        13.43640        3.98160        1.96000
Au        17.12180       -0.73470        3.63400
Au        15.13020       -2.61170        2.85240
Au        16.28840        4.04730        1.70480
Au        17.75390       -0.55960       -3.07090
Au        15.62920       -4.11740        0.43890
Au        16.00300       -1.33320        0.04030
Au        17.12260        4.15020       -1.02590
Au        15.32540       -1.76650       -4.07810
Au        15.38440        0.67120        1.82510
Au        11.56670        0.77950       -1.57930
Au        11.16060       -2.15590       -1.06510
Au        12.59980       -1.16660       -3.42050
Au        17.60620        1.98910        3.19230
Au        16.74850       -3.10810       -2.05570
Au        13.20490       -0.67710        0.33860
Au        13.05930       -3.98080        1.55280
Au        14.92430        2.58150        3.88120
Au        12.62850        1.24170        2.62120
Au        15.79620        1.00700       -4.50640
Au        12.39990        3.59690       -1.95480
Au        16.75770        1.34460       -0.55280
Au        18.77190        0.04330        1.44090
Au        10.54520       -0.11450        1.03810
Au        15.13680        3.26800       -2.79340
Au        19.50440        0.94700       -1.20870
Au        17.79700       -2.71510        1.72240
Au        11.33570        2.66120        0.53380
Au        17.82620        2.30270       -3.04810
Au        14.47680        4.97020       -0.47340
Au        14.42630       -0.24720        4.32900
Au        14.10420        2.15000       -0.16150
Au        18.82550       -1.76400       -0.73430
C          8.69140       -5.04900       -3.28570
C          7.87680       -5.11190       -4.42810
C          7.40490       -6.34110       -4.88860
C          9.01920       -6.25650       -2.62520
C          8.53170       -7.47970       -3.08920
C          7.71980       -7.53000       -4.22780
O          9.75780       -6.25270       -1.47640
H          7.61250       -4.19360       -4.95490
H          8.79610       -8.38970       -2.54820
H          7.34210       -8.48180       -4.59890
C         10.67630       -5.12990       -1.29520
C         10.16290       -3.80590       -1.78230
C          9.21090       -3.79840       -2.74510
H          8.83760       -2.86460       -3.17370
H         11.63120       -5.36840       -1.80550
H         10.87820       -5.12230       -0.21470
C          8.00810       -1.23120        1.81300
C          8.42090       -0.16860        1.22310
H          8.28190       -2.18830        2.23670
C          7.55760        0.92350        0.67820
H          7.31000        1.63150        1.48900
O          6.32790        0.43070        0.06890
H          8.04670        1.47660       -0.12860
C          5.69530       -0.62230        0.63780
C          5.85220       -0.96330        2.01160
C          4.91410       -1.42970       -0.20260
C          4.26840       -2.55850        0.30000
C          4.42300       -2.89330        1.65800
C          5.16840       -2.09960        2.51330
H          5.25410       -2.35750        3.57020
H          3.65400       -3.18420       -0.34940
H          4.83890       -1.16840       -1.25960
H          6.16120       -0.19430        2.72210
Cl         3.61600       -4.32250        2.27660
Cl         6.39590       -6.39630       -6.32850
73
IM7-Cl   -271.38736   eV    ; -272.68396  eV
Au        18.81740        2.88430        0.82010
Au        12.43070       -1.62380        2.87030
Au        13.11060        1.60340       -3.88050
Au        13.95820       -2.81330       -1.47670
Au        14.69390        0.07830       -1.99120
Au        13.45650        3.98690        1.95200
Au        17.13520       -0.72610        3.63060
Au        15.14100       -2.60080        2.83710
Au        16.29940        4.05340        1.69390
Au        17.76610       -0.56180       -3.07060
Au        15.64370       -4.11520        0.43400
Au        16.00390       -1.33270        0.03950
Au        17.13780        4.15510       -1.03290
Au        15.33530       -1.76410       -4.07900
Au        15.39980        0.67300        1.81980
Au        11.60340        0.77740       -1.57960
Au        11.17800       -2.15530       -1.06840
Au        12.61550       -1.17230       -3.42410
Au        17.61600        1.99810        3.18700
Au        16.75740       -3.10390       -2.05560
Au        13.18790       -0.66140        0.34790
Au        13.06960       -3.96640        1.53420
Au        14.93650        2.58960        3.87540
Au        12.63720        1.24140        2.60890
Au        15.80980        1.00840       -4.51270
Au        12.41770        3.59720       -1.96730
Au        16.76320        1.35110       -0.55730
Au        18.79300        0.04650        1.44020
Au        10.51630       -0.15880        1.06550
Au        15.14930        3.27600       -2.80030
Au        19.51250        0.94920       -1.20830
Au        17.81140       -2.70440        1.71730
Au        11.37460        2.66660        0.52350
Au        17.82930        2.30150       -3.05080
Au        14.48970        4.97880       -0.48250
Au        14.43820       -0.23570        4.31990
Au        14.11000        2.14440       -0.16610
Au        18.84350       -1.76870       -0.73890
C          8.73440       -5.05360       -3.30140
C          7.93570       -5.12770       -4.45410
C          7.46440       -6.36150       -4.90140
C          9.04060       -6.25380       -2.61730
C          8.55380       -7.48220       -3.06980
C          7.76140       -7.54260       -4.22060
O          9.76210       -6.23500       -1.45790
H          7.68010       -4.21990       -5.00050
H          8.80410       -8.38560       -2.51140
H          7.38340       -8.49580       -4.58750
C         10.70670       -5.13290       -1.31120
C         10.20090       -3.80530       -1.80010
C          9.25390       -3.79900       -2.76880
H          8.88320       -2.86750       -3.20430
H         11.64100       -5.39370       -1.84740
H         10.93750       -5.11880       -0.23720
C          7.76140       -1.11010        1.91220
C          8.45660       -0.15920        1.27340
H          8.19720       -1.98140        2.40060
C          7.65250        0.91490        0.60800
H          7.31630        1.66260        1.35000
O          6.43720        0.40270       -0.06630
H          8.18750        1.43380       -0.19270
C          5.82350       -0.63750        0.50590
C          6.21150       -0.99940        1.90300
C          4.89820       -1.36640       -0.23190
C          4.27230       -2.48460        0.32700
C          4.60610       -2.88510        1.64710
C          5.50300       -2.20740        2.42080
H          5.73240       -2.54290        3.43080
H          3.56340       -3.07560       -0.24940
H          4.69720       -1.07210       -1.26350
H          5.97550       -0.12900        2.56140
Cl         3.81710       -4.32070        2.28170
Cl         6.47060       -6.43350       -6.35160
72
IM8-Cl   -271.68396   eV    ; -275.31178  eV
Au        18.97540        2.51880        0.55820
Au        12.40500       -1.13500        3.28170
Au        12.77490        1.81130       -3.74710
Au        13.47190       -2.64180       -1.34030
Au        14.37900        0.28830       -1.89390
Au        13.82330        4.31430        2.05990
Au        17.14000       -0.86610        3.67830
Au        14.89870       -2.59930        3.13820
Au        16.63740        3.97140        1.55110
Au        17.31790       -0.88770       -3.19250
Au        15.17370       -4.07790        0.56440
Au        15.70750       -1.34810        0.00120
Au        17.32700        3.97800       -1.20790
Au        14.65350       -1.77560       -3.86060
Au        15.43870        0.64770        1.88570
Au        11.35780        1.24420       -1.27020
Au        10.79840       -1.72690       -0.54680
Au        12.05510       -0.84740       -3.06920
Au        17.82990        1.80870        3.03760
Au        16.17580       -3.32860       -2.07060
Au        12.99280       -0.30740        0.56650
Au        12.69300       -3.11580        1.39990
Au        15.32230        2.76220        3.86150
Au        12.84370        1.66200        2.80260
Au        15.40850        0.86400       -4.55040
Au        12.47580        3.88370       -1.76560
Au        16.66370        1.25100       -0.58620
Au        18.59340       -0.27470        1.26090
Au        10.44830        0.43210        1.53290
Au        15.08350        3.14200       -2.70640
Au        19.30030        0.45840       -1.45910
Au        17.42650       -2.87690        1.74000
Au        11.50140        3.17570        0.80560
Au        17.62850        1.95290       -3.19070
Au        14.81260        5.09210       -0.49590
Au        14.61280        0.02550        4.51460
Au        14.13040        2.32660        0.02320
Au        18.38040       -2.14710       -0.84270
C          8.20460       -4.24560       -3.06590
C          7.57750       -4.20090       -4.32040
C          7.09380       -5.36960       -4.90980
C          8.31670       -5.50030       -2.41710
C          7.82850       -6.66220       -3.01760
C          7.21510       -6.60460       -4.27400
O          8.84700       -5.59480       -1.16510
H          7.46990       -3.24660       -4.83890
H          7.94310       -7.61230       -2.49430
H          6.84840       -7.50820       -4.76060
C          9.83630       -4.57410       -0.79620
C          9.57950       -3.19910       -1.33630
C          8.77180       -3.07060       -2.41690
H          8.59060       -2.09630       -2.87810
H         10.83360       -4.92130       -1.13210
H          9.83200       -4.59010        0.30020
C          7.70470       -0.20720        2.69600
C          8.40940        0.55370        1.82380
H          8.20580       -0.88550        3.39150
C          7.64830        1.40860        0.85320
H          8.12890        2.38200        0.69770
O          6.27940        1.75470        1.26130
H          7.59710        0.89800       -0.12780
C          5.57990        0.79340        1.92740
C          6.24800       -0.19670        2.68900
C          4.18450        0.85260        1.89870
C          3.42150       -0.07940        2.61240
C          4.07720       -1.06040        3.35490
C          5.47040       -1.12410        3.40090
H          5.95980       -1.89920        3.99320
H          2.33260       -0.05170        2.58690
H          3.70130        1.63110        1.30730
Cl         3.12480       -2.24580        4.25420
Cl         6.32390       -5.28490       -6.49750
72
TS8-Cl   -270.49266   eV    ; -274.16652  eV 
Au        18.79120        2.76220        0.98400
Au        12.28700       -1.82280        2.34860
Au        12.96040        1.80240       -3.76620
Au        13.78160       -2.83050       -1.63770
Au        14.74810        0.38170       -2.08760
Au        13.25210        3.84190        1.99830
Au        16.86710       -1.05400        3.56940
Au        14.93120       -3.02470        2.70640
Au        16.19030        3.88550        1.84190
Au        17.66990       -0.53050       -3.20660
Au        15.55060       -4.15540        0.13120
Au        15.97770       -1.32970       -0.22320
Au        17.17400        4.17940       -0.88830
Au        15.02290       -1.58960       -3.99880
Au        15.25590        0.43520        1.74230
Au        10.74060        1.44650       -2.04750
Au        11.13080       -2.45560       -0.54970
Au        12.25300       -0.79820       -2.80870
Au        17.42610        1.74110        3.23410
Au        16.68990       -3.11440       -2.31250
Au        13.14530       -0.52210        0.02760
Au        12.89180       -4.14190        0.95140
Au        14.72050        2.27780        3.81780
Au        12.44190        1.06590        2.41920
Au        15.72720        1.16900       -4.58460
Au        12.39870        3.87300       -1.85930
Au        16.71000        1.42510       -0.41330
Au        18.52630       -0.15210        1.38460
Au        10.36990        0.01370        0.66300
Au        15.10790        3.35230       -2.66400
Au        19.38950        0.89030       -1.17200
Au        17.58080       -2.85900        1.53940
Au        11.19020        2.67460        0.43340
Au        17.76090        2.30720       -2.97550
Au        14.53670        4.98030       -0.27810
Au        14.11490       -0.60130        4.09260
Au        13.98720        2.18870       -0.14100
Au        18.76620       -1.83870       -0.90490
C          7.67930       -3.51190       -2.29560
C          7.42330       -3.65150       -3.67590
C          6.67190       -4.72770       -4.14520
C          7.12710       -4.47950       -1.40880
C          6.37040       -5.54410       -1.89750
C          6.14370       -5.68320       -3.27390
O          7.29560       -4.35680       -0.06050
H          7.82240       -2.91670       -4.37390
H          5.97260       -6.27400       -1.19120
H          5.58340       -6.53400       -3.66250
C          8.59330       -3.79770        0.31160
C          8.97840       -2.55580       -0.44360
C          8.49630       -2.46320       -1.73980
H          8.78700       -1.62880       -2.38610
H          9.36210       -4.56660        0.11850
H          8.53040       -3.63200        1.39230
C          7.83700       -1.13270        1.84890
C          8.38130       -0.76840        0.62990
H          8.43690       -1.65570        2.59910
C          7.49630        0.09760       -0.22140
H          7.63390        1.14270        0.11390
O          6.07240       -0.22910       -0.13370
H          7.73230        0.04100       -1.28930
C          5.61090       -0.34910        1.14050
C          6.47440       -0.79080        2.18190
C          4.26310       -0.07880        1.38550
C          3.74240       -0.19570        2.67940
C          4.59560       -0.58670        3.71430
C          5.93390       -0.89370        3.48200
H          6.56520       -1.22270        4.30740
H          2.69900        0.04350        2.88240
H          3.63080        0.23780        0.55410
Cl         3.94490       -0.68060        5.35350
Cl         6.39350       -4.90810       -5.87720
18
Pr-Cl    -93.59121    eV    ; -93.78748   eV  
C          8.25770       -3.57010       -1.93780
C          7.67840       -3.19560       -3.15790
C          7.64420       -4.09530       -4.22150
C          8.79810       -4.86840       -1.80760
C          8.78070       -5.75360       -2.88510
C          8.19830       -5.37110       -4.09450
O          9.43260       -5.26670       -0.65870
H          8.91360       -2.48790        1.25620
H          7.26140       -2.19480       -3.27650
H          9.22400       -6.74260       -2.76390
H          8.17310       -6.05990       -4.93810
C          9.02420       -4.60780        0.56340
C          8.78780       -3.13790        0.38850
C          8.39360       -2.66280       -0.80600
H          8.18450       -1.60200       -0.95610
H          9.83680       -4.80890        1.27380
H          8.11150       -5.10810        0.94650
Cl         6.91320       -3.61540       -5.73600
34
Prd-Cl   -182.49777  eV    ;  -182.83531 eV  
C          7.64510       -4.15410       -2.84960
C          8.04210       -4.02690       -4.19210
C          8.39710       -5.15500       -4.92560
C          7.62620       -5.44220       -2.26730
C          7.95940       -6.56970       -3.01720
C          8.35160       -6.42910       -4.34890
O          7.19110       -5.61840       -0.98200
H          8.05790       -3.04330       -4.66230
H          7.91740       -7.55180       -2.54580
H          8.62770       -7.30150       -4.94020
C          7.37280       -4.49470       -0.09440
C          6.97620       -3.17160       -0.71060
C          7.17770       -3.04200       -2.05480
H          6.98770       -2.10070       -2.57170
H          8.43120       -4.46640        0.23010
H          6.75280       -4.74090        0.77510
C          6.52230       -2.15180        1.50680
C          6.53110       -2.09220        0.14310
H          6.83180       -3.05200        2.03920
C          6.15910       -0.76650       -0.48310
H          7.06550       -0.15330       -0.65470
O          5.21940        0.00110        0.29770
H          5.65330       -0.90790       -1.44490
C          5.44420        0.04410        1.64660
C          6.10060       -1.02170        2.30110
C          4.92610        1.11700        2.37110
C          5.08380        1.16090        3.75670
C          5.75100        0.11990        4.41000
C          6.24810       -0.96730        3.69830
H          6.74910       -1.78070        4.22390
H          4.69750        2.00140        4.33260
H          4.40610        1.91480        1.84090
Cl         5.95560        0.18310        6.14490
Cl         8.89220       -4.98140       -6.59290
18
Sub-Br       -90.94769 eV    ;     -91.22603 eV  
C          6.12720       -6.31870        0.46940
C          5.65820       -7.19330        1.44330
C          6.39650       -7.37270        2.61690
C          7.32930       -5.61850        0.65860
C          8.06440       -5.80730        1.83720
C          7.59090       -6.68960        2.81860
O          7.68170       -4.78590       -0.37380
H          5.57290       -6.16060       -0.45540
H          4.72510       -7.73360        1.29040
H          9.00430       -5.28620        2.01280
H          8.16150       -6.84100        3.73380
C          8.90630       -4.04350       -0.23300
C          9.07260       -3.19400       -1.40000
C          9.22720       -2.45900       -2.35040
H          9.35540       -1.81480       -3.19620
H          9.76040       -4.73830       -0.13930
H          8.86880       -3.42250        0.68040
Br         5.75020       -8.60120        3.95490
56
IM1-Br       -176.26158 eV   ;     -176.53604 eV
Au        18.91800        2.23840        1.41920
Au        12.16500       -2.16530        2.55850
Au        13.06710        2.21380       -3.50000
Au        13.84130       -2.68130       -2.16070
Au        14.66620        0.38150       -1.91160
Au        13.42930        3.38930        2.78310
Au        16.93640       -1.86570        3.54600
Au        14.80820       -3.26940        2.22650
Au        16.27940        3.15640        2.36430
Au        17.55560       -0.36020       -2.89240
Au        15.43540       -4.33890       -0.37710
Au        16.04660       -1.54150       -0.32350
Au        17.34370        4.01560       -0.13900
Au        15.16180       -1.22760       -4.26020
Au        15.31220       -0.11430        1.96340
Au        11.54450        1.02190       -1.35560
Au        11.11750       -1.89600       -1.36880
Au        12.45140       -0.56840       -3.55210
Au        17.54490        0.89470        3.52040
Au        16.65330       -3.07670       -2.66540
Au        13.26310       -0.92980        0.15280
Au        12.74700       -3.74860        0.30230
Au        14.91250        1.50070        4.30770
Au        12.49160        0.65890        3.03660
Au        15.77790        1.56760       -4.21510
Au        12.51920        3.73900       -1.13570
Au        16.70530        1.21010       -0.11070
Au        18.57990       -0.72360        1.46150
Au        10.63630       -0.27820        1.09780
Au        15.22770        3.40080       -1.99010
Au        19.40750        0.62490       -0.91050
Au        17.55180       -3.42390        1.25720
Au        11.30750        2.48290        1.12970
Au        17.86320        2.43250       -2.44800
Au        14.64400        4.68010        0.54500
Au        14.23900       -1.29820        4.29990
Au        14.00800        1.84640        0.42970
Au        18.78960       -2.17810       -1.00350
C          6.16260       -6.26310        0.43080
C          5.66880       -7.14830        1.38440
C          6.38610       -7.35250        2.56600
C          7.36740       -5.58360        0.65530
C          8.08340       -5.79670        1.83900
C          7.58560       -6.68870        2.79770
O          7.75420       -4.72880       -0.35030
H          5.62980       -6.08330       -0.50370
H          4.73050       -7.67400        1.21080
H          9.02570       -5.28830        2.03590
H          8.13840       -6.85570        3.72170
C          8.98930       -4.04500       -0.13780
C          9.22280       -3.16840       -1.28470
C          9.16850       -2.52120       -2.34310
H          8.85160       -2.09910       -3.28210
H          9.82820       -4.75800       -0.03900
H          8.95630       -3.44030        0.78500
Br         5.70360       -8.58570        3.88240
56
TS1/2-Br     -175.7734 eV    ;     -176.10906 eV  
Au        19.07050        2.11940        0.69530
Au        12.32350       -1.43780        3.35460
Au        12.80640        1.45750       -3.50890
Au        13.47130       -3.12930       -1.21710
Au        14.48140       -0.10340       -1.73440
Au        13.85290        3.93980        2.23350
Au        17.20260       -1.23750        3.83270
Au        14.87340       -2.69130        2.95930
Au        16.61190        3.43230        1.63720
Au        17.20040       -1.22470       -2.80150
Au        15.17300       -4.43340        0.70500
Au        15.90680       -1.72700        0.10650
Au        17.44070        3.63950       -1.07480
Au        14.65490       -2.20850       -3.70100
Au        15.45630        0.22690        2.05900
Au        11.44930        0.86730       -1.03040
Au        10.84770       -2.00490       -0.26990
Au        12.10630       -1.22060       -2.83820
Au        17.90650        1.39630        3.16200
Au        16.22140       -3.76570       -1.88830
Au        13.20540       -0.83380        0.67270
Au        12.55050       -3.56360        1.48620
Au        15.39240        2.32830        4.01310
Au        12.82880        1.38690        3.15540
Au        15.38780        0.49790       -4.34650
Au        12.54250        3.52110       -1.54320
Au        16.70860        0.94980       -0.38390
Au        18.72360       -0.70250        1.43560
Au        10.68890        0.18060        1.70300
Au        15.13650        2.84770       -2.58580
Au        19.28450        0.04500       -1.27940
Au        17.51090       -3.28570        1.88340
Au        11.52020        2.83560        1.04600
Au        17.66510        1.58410       -3.02400
Au        14.86810        4.65880       -0.33360
Au        14.60150       -0.35840        4.68670
Au        14.11540        1.89980        0.23950
Au        18.55190       -2.65230       -0.68330
C          6.33380       -3.25200       -1.48600
C          5.44710       -2.81250       -2.50750
C          5.11970       -3.66600       -3.54320
C          6.84950       -4.57880       -1.54900
C          6.49430       -5.42600       -2.60920
C          5.61350       -4.98370       -3.59230
O          7.72960       -5.05540       -0.63980
H          6.28210       -2.74660       -0.52050
H          5.04050       -1.80210       -2.46390
H          6.91100       -6.43320       -2.63980
H          5.29970       -5.65270       -4.39370
C          8.49960       -4.10200        0.14690
C          8.96190       -2.93300       -0.66330
C          8.27630       -2.34590       -1.58020
H          8.27060       -1.59700       -2.35760
H          9.32880       -4.69420        0.54560
H          7.88810       -3.74250        0.99240
Br         3.88790       -3.07170       -4.90350
56
IM2-Br       -176.32889 eV   ;    -176.64235 eV
Au        19.05510        2.10790        0.69230
Au        12.31160       -1.43950        3.34140
Au        12.79740        1.45170       -3.51660
Au        13.46050       -3.11970       -1.20970
Au        14.46290       -0.11160       -1.73840
Au        13.83770        3.94220        2.22460
Au        17.18660       -1.23680        3.83090
Au        14.86150       -2.68500        2.95910
Au        16.60100        3.43300        1.63230
Au        17.18830       -1.23180       -2.80010
Au        15.16440       -4.42980        0.70250
Au        15.88910       -1.72830        0.10600
Au        17.41930        3.64000       -1.08710
Au        14.64750       -2.22070       -3.70200
Au        15.44290        0.22570        2.05300
Au        11.44940        0.86790       -1.03300
Au        10.77160       -1.98700       -0.30020
Au        12.09820       -1.23260       -2.83280
Au        17.88490        1.39990        3.16480
Au        16.21380       -3.77380       -1.88790
Au        13.16810       -0.84680        0.64810
Au        12.55440       -3.56660        1.49760
Au        15.37330        2.33340        4.00570
Au        12.81560        1.38580        3.14670
Au        15.37990        0.48990       -4.34750
Au        12.53210        3.51770       -1.55450
Au        16.69220        0.94490       -0.38730
Au        18.71010       -0.70850        1.43570
Au        10.67580        0.18180        1.69430
Au        15.12480        2.83980       -2.59410
Au        19.27110        0.03800       -1.27450
Au        17.49530       -3.28460        1.88410
Au        11.51020        2.83250        1.03830
Au        17.65430        1.58070       -3.02130
Au        14.85530        4.65240       -0.34110
Au        14.58240       -0.35720        4.68200
Au        14.10240        1.89340        0.23540
Au        18.54450       -2.65540       -0.68340
C          6.64450       -3.16520       -1.53790
C          5.70180       -2.71790       -2.60220
C          5.20820       -3.59730       -3.51500
C          6.97850       -4.61690       -1.59560
C          6.45320       -5.46800       -2.56330
C          5.55460       -4.97670       -3.51380
O          7.84780       -5.09680       -0.70980
H          6.16950       -2.97460       -0.54670
H          5.42760       -1.66360       -2.62320
H          6.76770       -6.51360       -2.56960
H          5.13120       -5.64180       -4.26580
C          8.57290       -4.10280        0.11110
C          8.92690       -2.86340       -0.65120
C          7.98740       -2.39430       -1.48150
H          8.09200       -1.52190       -2.12460
H          9.43550       -4.66040        0.48740
H          7.91340       -3.85150        0.96220
Br         3.97560       -2.97720       -4.86610
56
TS2/3-Br     -175.35005 eV   ;    -175.75046 eV  
Au        19.07320        1.99310        0.53630
Au        12.34490       -1.37830        3.43530
Au        12.64710        1.47580       -3.40920
Au        13.22280       -3.08650       -1.12730
Au        14.33850       -0.13000       -1.71840
Au        13.97100        3.92960        2.28970
Au        17.19230       -1.29300        3.72520
Au        14.82980       -2.71640        2.98500
Au        16.69730        3.37840        1.59390
Au        16.99040       -1.29090       -2.89900
Au        14.99230       -4.45270        0.68170
Au        15.76020       -1.75360        0.10840
Au        17.38530        3.56360       -1.16390
Au        14.33640       -2.19800       -3.68710
Au        15.43430        0.25050        2.04190
Au        11.34480        0.98710       -0.89320
Au        10.62320       -1.82470       -0.02700
Au        11.84530       -1.16920       -2.66170
Au        17.98050        1.31750        3.05630
Au        15.93760       -3.77120       -1.93450
Au        13.10480       -0.79720        0.72530
Au        12.46140       -3.54100        1.62740
Au        15.53670        2.31760        4.04050
Au        12.88970        1.45700        3.27100
Au        15.17370        0.47550       -4.35440
Au        12.50000        3.58380       -1.45220
Au        16.64080        0.88270       -0.44520
Au        18.63330       -0.80980        1.28140
Au        10.70110        0.31850        1.85310
Au        15.03460        2.82800       -2.58920
Au        19.19090       -0.05070       -1.42990
Au        17.39060       -3.37110        1.78160
Au        11.55930        2.94430        1.19530
Au        17.51580        1.50950       -3.11240
Au        14.88880        4.64550       -0.29860
Au        14.67010       -0.34750        4.69420
Au        14.08910        1.91080        0.23730
Au        18.34290       -2.72550       -0.83430
C          6.87340       -3.19840       -1.83300
C          5.98650       -2.80280       -2.88580
C          5.48830       -3.75200       -3.75120
C          7.19310       -4.59420       -1.69360
C          6.67680       -5.52110       -2.60340
C          5.82980       -5.11210       -3.63340
O          8.07770       -5.02700       -0.77810
H          6.60960       -2.57970       -0.74940
H          5.73610       -1.74940       -3.00590
H          6.96660       -6.57110       -2.50400
H          5.42440       -5.83970       -4.33370
C          8.50540       -4.07070        0.25230
C          8.81930       -2.71750       -0.32060
C          7.87470       -2.22310       -1.18670
H          7.86150       -1.20600       -1.57400
H          9.37170       -4.54990        0.71730
H          7.69360       -3.99550        1.00240
Br         4.31450       -3.21260       -5.18450
56
IM3-Br       -176.89502 eV   ;    -177.1241  eV
Au        19.07160        2.26340        0.29730
Au        12.37080       -0.95040        3.30520
Au        12.65010        1.79370       -3.60350
Au        13.09220       -2.76250       -1.30880
Au        14.30110        0.16750       -1.91620
Au        14.06880        4.27860        2.07010
Au        17.21110       -0.92300        3.51120
Au        14.81870       -2.33640        2.82140
Au        16.79210        3.71030        1.37080
Au        16.96890       -1.00790       -3.15900
Au        14.89640       -4.06500        0.51030
Au        15.72200       -1.40040       -0.04840
Au        17.44000        3.84760       -1.42480
Au        14.22900       -1.86000       -3.90470
Au        15.48180        0.65360        1.83520
Au        11.37510        1.39030       -1.07950
Au        10.51730       -1.40230       -0.33730
Au        11.76050       -0.83460       -2.82890
Au        18.06620        1.66990        2.85050
Au        15.81480       -3.38720       -2.10530
Au        13.09800       -0.43500        0.53930
Au        12.39890       -3.08620        1.48260
Au        15.61740        2.68960        3.84260
Au        12.91280        1.85730        3.10310
Au        15.15310        0.77920       -4.53800
Au        12.54850        3.94970       -1.66880
Au        16.63150        1.19530       -0.69510
Au        18.65750       -0.50750        1.06600
Au        10.73890        0.65320        1.62450
Au        15.05930        3.15550       -2.82860
Au        19.19390        0.24000       -1.65290
Au        17.34730       -3.03460        1.59360
Au        11.62000        3.31850        1.02840
Au        17.52590        1.77990       -3.36410
Au        14.97770        4.95300       -0.52540
Au        14.72460        0.05860        4.49320
Au        14.10320        2.25040        0.01250
Au        18.26120       -2.39860       -1.05290
C          7.08590       -2.88680       -2.16180
C          6.31160       -2.54850       -3.27820
C          5.91040       -3.53220       -4.17640
C          7.46180       -4.22670       -1.97190
C          7.06180       -5.20790       -2.89150
C          6.28250       -4.86570       -3.99620
O          8.23940       -4.65410       -0.92810
H          6.77720       -1.57530       -0.48330
H          6.04080       -1.50450       -3.43970
H          7.37900       -6.23930       -2.72570
H          5.97090       -5.62980       -4.70860
C          8.54070       -3.67130        0.10970
C          8.76350       -2.30710       -0.44260
C          7.58560       -1.81410       -1.20690
H          7.79260       -0.88390       -1.74890
H          9.40730       -4.07950        0.63920
H          7.67530       -3.64600        0.80260
Br         4.84660       -3.03460       -5.70840
56
TS3/4-Br    -176.19243 eV    ;   -176.60337  eV
Au        19.12260        2.28160        0.18310
Au        12.32920       -0.86350        3.30930
Au        12.55170        1.89640       -3.45350
Au        13.09060       -2.70270       -1.16130
Au        14.28980        0.27210       -1.81560
Au        14.12150        4.37600        2.04770
Au        17.20610       -0.93160        3.47340
Au        14.78440       -2.32160        2.86280
Au        16.82540        3.76450        1.29480
Au        16.87340       -1.05110       -3.10490
Au        14.85070       -4.13930        0.58680
Au        15.67980       -1.42710       -0.05460
Au        17.45380        3.87370       -1.47560
Au        14.16850       -1.84640       -3.70700
Au        15.45910        0.63620        1.82090
Au        11.19120        1.51460       -0.95160
Au        10.57870       -1.40630        0.02930
Au        11.74940       -0.69270       -2.62050
Au        18.06000        1.64450        2.73060
Au        15.76740       -3.49860       -2.04450
Au        13.03620       -0.31040        0.62090
Au        12.38920       -3.10310        1.58120
Au        15.68470        2.72980        3.77480
Au        13.01060        1.91910        3.01530
Au        15.02490        0.79030       -4.48140
Au        12.52710        4.04080       -1.57430
Au        16.65660        1.18870       -0.66950
Au        18.56260       -0.52970        0.97270
Au        10.64680        0.88570        1.78330
Au        15.02230        3.17300       -2.77100
Au        19.14360        0.14450       -1.75100
Au        17.28390       -3.07240        1.59250
Au        11.58940        3.49210        1.07150
Au        17.45110        1.74530       -3.36120
Au        14.99930        5.05490       -0.56290
Au        14.72660        0.08670        4.49720
Au        14.12640        2.35050        0.06700
Au        18.22620       -2.51010       -1.05170
C          7.20200       -2.94430       -2.29140
C          6.31950       -2.58040       -3.32770
C          5.80590       -3.56640       -4.15640
C          7.51950       -4.30870       -2.09080
C          7.00770       -5.28620       -2.94890
C          6.14260       -4.91460       -3.97760
O          8.38060       -4.69190       -1.10740
H          7.71120       -1.62780       -0.37790
H          6.07790       -1.52570       -3.49160
H          7.29420       -6.32680       -2.80540
H          5.73590       -5.67110       -4.64590
C          8.47460       -3.75210        0.00750
C          8.83980       -2.36950       -0.47910
C          8.00630       -1.96820       -1.57240
H          8.16300       -0.98130       -2.01620
H          9.24160       -4.17410        0.66180
H          7.50690       -3.74450        0.54320
Br         4.66080       -3.06460       -5.62760
56
IM4-Br        -178.19897 eV  ;    -178.49437 eV 
Au        19.11460        2.16380        0.59220
Au        12.35320       -1.40960        3.38840
Au        12.69560        1.43600       -3.44400
Au        13.39860       -3.08930       -1.16230
Au        14.47930       -0.10200       -1.74160
Au        13.88710        3.90590        2.20180
Au        17.14370       -1.23170        3.78130
Au        14.84480       -2.84030        3.17480
Au        16.68880        3.57530        1.64850
Au        17.15990       -1.30440       -2.92350
Au        15.11560       -4.41140        0.73770
Au        15.84850       -1.72690        0.14110
Au        17.38460        3.62170       -1.10790
Au        14.52680       -2.19960       -3.67230
Au        15.39100        0.24900        2.06600
Au        11.21340        0.90320       -1.03710
Au        10.78530       -2.00700       -0.23300
Au        11.98100       -1.20030       -2.74920
Au        17.88590        1.40500        3.02990
Au        16.09960       -3.77020       -1.90000
Au        13.15140       -0.79980        0.64970
Au        12.58080       -3.51530        1.58170
Au        15.44550        2.36950        4.00400
Au        12.86870        1.39660        3.15070
Au        15.27200        0.48230       -4.37650
Au        12.47990        3.52550       -1.51430
Au        16.69640        0.94540       -0.32940
Au        18.56450       -0.72450        1.34320
Au        10.68720        0.20620        1.72290
Au        15.06210        2.79430       -2.54390
Au        19.20810       -0.01390       -1.33660
Au        17.43870       -3.33930        1.91590
Au        11.50390        2.83550        1.06420
Au        17.54950        1.51910       -3.01840
Au        14.85970        4.67440       -0.33230
Au        14.61770       -0.34280        4.71610
Au        14.08560        1.89940        0.19450
Au        18.43050       -2.70560       -0.72350
C          8.36770       -3.54960       -1.93640
C          7.75590       -3.18590       -3.14830
C          7.66460       -4.11160       -4.18200
C          8.88250       -4.85790       -1.79070
C          8.79720       -5.77330       -2.84150
C          8.18180       -5.40280       -4.04140
O          9.53800       -5.23430       -0.64820
H          8.67400       -2.56170        1.33760
H          7.36250       -2.17650       -3.26790
H          9.20600       -6.77580       -2.70380
H          8.09510       -6.11750       -4.86040
C          9.07830       -4.60550        0.56670
C          8.88320       -3.12230        0.42370
C          8.47730       -2.63630       -0.81470
H          8.07590       -1.62780       -0.91720
H          9.83550       -4.84950        1.32200
H          8.11680       -5.06950        0.86520
Br         6.80640       -3.59860       -5.82860
55
IM5-Br       -178.57887 eV   ;    -179.61637 eV
Au        19.06570        2.51950        0.57590
Au        12.35440       -1.10130        3.20580
Au        12.85720        1.80670       -3.66050
Au        13.57310       -2.76310       -1.33860
Au        14.51220        0.25200       -1.86570
Au        13.83980        4.31750        2.09130
Au        17.23640       -0.83850        3.70320
Au        14.92630       -2.30330        2.81140
Au        16.61000        3.82700        1.50450
Au        17.26630       -0.83390       -2.92330
Au        15.26590       -4.07010        0.57400
Au        15.95190       -1.35310       -0.02590
Au        17.43620        4.03860       -1.21600
Au        14.74570       -1.85370       -3.83810
Au        15.48850        0.60520        1.91160
Au        11.52850        1.20840       -1.16870
Au        10.85230       -1.67660       -0.47670
Au        12.18700       -0.89420       -2.97930
Au        17.90970        1.80290        3.04640
Au        16.32990       -3.39550       -2.01880
Au        13.21870       -0.50180        0.52320
Au        12.63720       -3.23860        1.37100
Au        15.38560        2.71620        3.87290
Au        12.84600        1.73090        2.98000
Au        15.44820        0.86580       -4.47770
Au        12.56030        3.87800       -1.70280
Au        16.72510        1.32910       -0.53200
Au        18.78940       -0.30130        1.32370
Au        10.71180        0.49880        1.53210
Au        15.16000        3.22990       -2.73810
Au        19.33310        0.46070       -1.39230
Au        17.57500       -2.88310        1.75860
Au        11.52450        3.18340        0.89390
Au        17.70150        1.98610       -3.14890
Au        14.86150        5.03320       -0.47430
Au        14.61470        0.01690        4.53720
Au        14.13390        2.26440        0.10280
Au        18.63270       -2.23770       -0.80170
C          7.11610       -3.00030       -2.39480
C          6.15410       -2.51450       -3.29400
C          5.10380       -3.33100       -3.70730
C          6.99250       -4.32550       -1.91820
C          5.93580       -5.13470       -2.34980
C          4.98110       -4.64110       -3.24880
O          7.86610       -4.86510       -1.02670
H          6.24440       -1.49270       -3.66280
H          5.87170       -6.15630       -1.97100
H          4.15920       -5.27410       -3.58390
C          9.04880       -4.09940       -0.59930
C          9.16740       -2.69380       -1.09650
C          8.24240       -2.19380       -1.94480
H          8.31620       -1.17470       -2.32860
H          9.92410       -4.68900       -0.91780
H          9.02200       -4.11780        0.50080
Br         3.79820       -2.62670       -4.95530
73
IM6-Br      -270.11242 eV    ;   -271.41446  eV
Au        18.79610        3.01250        1.18600
Au        12.70740       -1.85320        2.83330
Au        13.07940        1.32460       -3.51770
Au        14.40300       -3.28340       -1.21600
Au        15.01760        0.23130       -1.72300
Au        13.21560        3.71220        2.28690
Au        17.18820       -0.76990        4.03260
Au        15.38680       -2.79810        3.10980
Au        16.07750        3.83290        1.98090
Au        18.00140       -0.60650       -2.80950
Au        16.23390       -4.28720        0.74480
Au        16.18320       -1.46590        0.19270
Au        16.98170        4.07600       -0.71270
Au        15.51500       -1.87770       -3.50730
Au        15.26470        0.25190        2.13750
Au        11.29530        0.66290       -1.34990
Au        11.59500       -3.00260       -0.52820
Au        12.81570       -1.36350       -2.62370
Au        17.54370        1.92420        3.47610
Au        17.27460       -3.24860       -1.77350
Au        13.28650       -0.87440        0.26460
Au        13.50980       -4.11800        1.45780
Au        14.83740        2.29050        4.12840
Au        12.56390        0.97900        2.86970
Au        15.86100        0.83280       -4.35410
Au        12.28760        3.38040       -1.65900
Au        16.83730        1.31040        0.07150
Au        18.96680        0.13260        1.82600
Au        10.68890       -0.51190        1.16940
Au        15.00680        3.14010       -2.49460
Au        19.52770        1.11760       -0.91220
Au        18.04510       -2.56830        2.05360
Au        11.17370        2.40630        0.79030
Au        17.66630        2.18210       -2.67380
Au        14.28720        4.76050       -0.14120
Au        14.38840       -0.53020        4.68590
Au        14.04630        1.95280        0.22390
Au        19.06520       -1.60130       -0.36780
C          8.65890       -5.46720       -2.64560
C          7.78850       -5.35710       -3.74170
C          7.11750       -6.48320       -4.21110
C          8.83610       -6.73570       -2.04490
C          8.14860       -7.85310       -2.52460
C          7.27940       -7.73270       -3.61680
O          9.62290       -6.88350       -0.93770
H          7.64380       -4.38420       -4.21130
H          8.30150       -8.81560       -2.03470
H          6.74260       -8.60170       -3.99640
C         10.70870       -5.91610       -0.77750
C         10.36550       -4.51100       -1.18060
C          9.37970       -4.33070       -2.08970
H          9.12150       -3.33930       -2.46660
H         11.57600       -6.26690       -1.36880
H         10.97740       -5.98720        0.28280
C          8.96870       -1.17360        2.44460
C          8.49450       -0.56890        1.45680
H          9.04950       -1.72760        3.36370
C          7.53480       -0.02080        0.50200
H          7.57280        1.08140        0.52610
O          6.22180       -0.49920        0.85660
H          7.79590       -0.34800       -0.51710
C          5.22080       -0.23650       -0.04120
C          5.34880        0.60650       -1.15320
C          3.99720       -0.87540        0.21360
C          2.91070       -0.67850       -0.63370
C          3.05230        0.16530       -1.73730
C          4.25710        0.80470       -2.00610
H          4.35840        1.45920       -2.87080
H          1.96570       -1.18430       -0.44200
H          3.92910       -1.53690        1.07760
H          6.28650        1.11340       -1.37150
Br         1.54710        0.43990       -2.92360
Br         5.91420       -6.30240       -5.72690
73
TS6/7-Br    -269.43699 eV    ;    -270.79666 eV
Au        18.81150        2.88380        0.82550
Au        12.42820       -1.62300        2.85320
Au        13.08830        1.60680       -3.86030
Au        13.96200       -2.81130       -1.49430
Au        14.69210        0.08770       -1.99280
Au        13.43500        3.98110        1.96770
Au        17.12450       -0.74080        3.63380
Au        15.13540       -2.62190        2.86050
Au        16.28940        4.04370        1.71130
Au        17.75290       -0.55620       -3.07480
Au        15.62760       -4.11470        0.43680
Au        16.01960       -1.33270        0.03600
Au        17.12070        4.14930       -1.02080
Au        15.32440       -1.76420       -4.08100
Au        15.39070        0.67130        1.82680
Au        11.56530        0.78720       -1.57530
Au        11.17960       -2.14220       -1.04920
Au        12.59810       -1.16020       -3.41800
Au        17.61100        1.98440        3.19420
Au        16.75250       -3.10920       -2.06240
Au        13.22840       -0.67310        0.34080
Au        13.06460       -3.99270        1.56540
Au        14.92980        2.57840        3.88810
Au        12.63880        1.24660        2.63250
Au        15.79410        1.01240       -4.50560
Au        12.39640        3.60020       -1.94470
Au        16.76130        1.34440       -0.55110
Au        18.76860        0.04230        1.43800
Au        10.57670       -0.10400        1.04240
Au        15.13520        3.26690       -2.78750
Au        19.50830        0.95010       -1.21260
Au        17.79850       -2.72230        1.72280
Au        11.33520        2.67190        0.54300
Au        17.82780        2.30680       -3.04830
Au        14.47590        4.97050       -0.46520
Au        14.43170       -0.25560        4.33340
Au        14.10560        2.15160       -0.15730
Au        18.82470       -1.76100       -0.73730
C          8.70550       -5.03650       -3.25680
C          7.88760       -5.09960       -4.39810
C          7.42120       -6.32980       -4.85280
C          9.03230       -6.24390       -2.59620
C          8.55080       -7.46870       -3.06130
C          7.73920       -7.52080       -4.20230
O          9.76800       -6.23680       -1.44560
H          7.62230       -4.17920       -4.92080
H          8.81990       -8.37880       -2.52360
H          7.37180       -8.47520       -4.57600
C         10.69530       -5.11940       -1.27790
C         10.18230       -3.79330       -1.76100
C          9.22650       -3.78550       -2.72060
H          8.85450       -2.85220       -3.15040
H         11.64000       -5.36500       -1.80250
H         10.91390       -5.11220       -0.20040
C          8.04190       -1.22030        1.81380
C          8.45290       -0.15830        1.22340
H          8.28720       -2.18230        2.23570
C          7.59850        0.94270        0.68260
H          7.34910        1.63600        1.50450
O          6.37140        0.45270        0.06130
H          8.09560        1.50490       -0.11400
C          5.73750       -0.60040        0.62720
C          5.88610       -0.92660        2.00430
C          4.94570       -1.40630       -0.20550
C          4.30930       -2.53560        0.30010
C          4.46310       -2.85640        1.65690
C          5.20940       -2.06370        2.51140
H          5.29320       -2.31250        3.57130
H          3.69970       -3.16070       -0.34840
H          4.87440       -1.15090       -1.26210
H          6.21360       -0.16660        2.71290
Br         3.60730       -4.45200        2.33980
Br         6.30230       -6.38390       -6.43860
73
IM7-Br      -269.98386 eV    ;   -271.2904   eV
Au        18.81760        2.88480        0.81970
Au        12.43140       -1.62450        2.87160
Au        13.11110        1.60390       -3.88120
Au        13.96100       -2.81380       -1.47820
Au        14.69420        0.07820       -1.99170
Au        13.45680        3.98740        1.95160
Au        17.13550       -0.72610        3.63070
Au        15.14130       -2.60100        2.83740
Au        16.29970        4.05400        1.69370
Au        17.76620       -0.56200       -3.07090
Au        15.64420       -4.11610        0.43450
Au        16.00520       -1.33300        0.03980
Au        17.13830        4.15510       -1.03320
Au        15.33580       -1.76400       -4.07930
Au        15.40100        0.67390        1.82070
Au        11.60560        0.78030       -1.58170
Au        11.18850       -2.14630       -1.05670
Au        12.61600       -1.17230       -3.42550
Au        17.61610        1.99840        3.18670
Au        16.75760       -3.10430       -2.05560
Au        13.19810       -0.65700        0.35120
Au        13.07010       -3.96620        1.53480
Au        14.93650        2.59050        3.87570
Au        12.63860        1.24310        2.61110
Au        15.80970        1.00840       -4.51240
Au        12.41750        3.59780       -1.96730
Au        16.76330        1.35080       -0.55740
Au        18.79350        0.04680        1.44030
Au        10.52720       -0.15430        1.06410
Au        15.14930        3.27620       -2.80000
Au        19.51290        0.94910       -1.20790
Au        17.81170       -2.70420        1.71740
Au        11.37510        2.66920        0.52330
Au        17.82940        2.30110       -3.05050
Au        14.48990        4.97900       -0.48290
Au        14.43810       -0.23600        4.32060
Au        14.11060        2.14530       -0.16640
Au        18.84330       -1.76890       -0.73920
C          8.74970       -5.05640       -3.27380
C          7.95270       -5.13350       -4.42730
C          7.48630       -6.36910       -4.86830
C          9.05680       -6.25310       -2.58510
C          8.57340       -7.48250       -3.03700
C          7.78170       -7.54980       -4.18980
O          9.77570       -6.22760       -1.42340
H          7.70370       -4.21980       -4.96690
H          8.82850       -8.38200       -2.47620
H          7.40940       -8.50830       -4.54950
C         10.72390       -5.12530       -1.28950
C         10.21430       -3.80100       -1.77930
C          9.26630       -3.80050       -2.74630
H          8.89400       -2.87240       -3.18520
H         11.64960       -5.38920       -1.83770
H         10.97000       -5.10800       -0.21890
C          7.76700       -1.09280        1.90130
C          8.46830       -0.14520        1.26530
H          8.19550       -1.96440        2.39390
C          7.67070        0.93430        0.60220
H          7.33110        1.67280        1.35150
O          6.45860        0.42750       -0.08100
H          8.20990        1.46080       -0.19060
C          5.83640       -0.60800        0.49180
C          6.21920       -0.96990        1.88960
C          4.91080       -1.33480       -0.24580
C          4.27970       -2.45330        0.31100
C          4.61330       -2.84740        1.63070
C          5.50530       -2.17430        2.40960
H          5.74770       -2.50900        3.41690
H          3.57490       -3.04010       -0.27450
H          4.72040       -1.03860       -1.27790
H          5.99090       -0.09630        2.54480
Br         3.76110       -4.44390        2.33200
Br         6.38720       -6.43840       -6.46740
72
IM8-Br      -270.29373 eV    ;   -273.92518  eV 
Au        18.97380        2.51770        0.55630
Au        12.40920       -1.13650        3.28310
Au        12.77500        1.81070       -3.74800
Au        13.47080       -2.64290       -1.33900
Au        14.38110        0.28790       -1.89590
Au        13.82440        4.31570        2.06000
Au        17.13910       -0.86700        3.67680
Au        14.90000       -2.60420        3.14140
Au        16.63840        3.97210        1.55020
Au        17.31820       -0.88830       -3.19410
Au        15.17340       -4.07650        0.56590
Au        15.71020       -1.34840       -0.00050
Au        17.32710        3.98000       -1.20880
Au        14.65380       -1.77740       -3.86030
Au        15.44000        0.64680        1.88650
Au        11.36170        1.24670       -1.27120
Au        10.79890       -1.71390       -0.53840
Au        12.05620       -0.84840       -3.06690
Au        17.82960        1.80900        3.03740
Au        16.17520       -3.32910       -2.07010
Au        13.00450       -0.30680        0.56780
Au        12.69310       -3.11610        1.40020
Au        15.32420        2.76440        3.86210
Au        12.84890        1.66450        2.80360
Au        15.40880        0.86310       -4.55170
Au        12.47790        3.88490       -1.76500
Au        16.66280        1.25280       -0.58680
Au        18.59270       -0.27460        1.26020
Au        10.46180        0.44220        1.53380
Au        15.08380        3.14060       -2.70580
Au        19.29800        0.45700       -1.46020
Au        17.42710       -2.87690        1.73860
Au        11.50300        3.17940        0.80500
Au        17.62830        1.95300       -3.19110
Au        14.81290        5.09300       -0.49460
Au        14.61360        0.02630        4.51590
Au        14.13140        2.32690        0.02340
Au        18.38150       -2.14850       -0.84380
C          8.21540       -4.25040       -3.03670
C          7.58920       -4.20860       -4.29200
C          7.11170       -5.38080       -4.87240
C          8.32760       -5.50170       -2.38260
C          7.84440       -6.66550       -2.98370
C          7.23290       -6.61630       -4.24370
O          8.85310       -5.58860       -1.12720
H          7.48480       -3.24970       -4.80020
H          7.96360       -7.61250       -2.45500
H          6.87230       -7.52660       -4.72190
C          9.85050       -4.57060       -0.77130
C          9.58980       -3.19680       -1.31170
C          8.78060       -3.07360       -2.39150
H          8.59610       -2.10300       -2.85750
H         10.84100       -4.92120       -1.12060
H          9.86340       -4.58240        0.32480
C          7.71710       -0.18760        2.68320
C          8.42540        0.57160        1.81290
H          8.21120       -0.86840        3.38020
C          7.66760        1.42460        0.83950
H          8.15660        2.39100        0.67300
O          6.30230        1.78220        1.25160
H          7.60760        0.90500       -0.13560
C          5.59820        0.82010        1.91320
C          6.26140       -0.17320        2.67410
C          4.20300        0.87930        1.88100
C          3.43280       -0.05140        2.59200
C          4.09220       -1.02820        3.33180
C          5.48180       -1.10050        3.38420
H          5.98010       -1.87070        3.97340
H          2.34450       -0.01460        2.55770
H          3.72630        1.65900        1.28520
Br         3.04620       -2.34030        4.32060
Br         6.26310       -5.27590       -6.62250
72
TS8-Br      -268.6755  eV    ;   -272.36395  eV  
Au        18.70060        2.53300        0.79040
Au        12.08820       -1.68920        2.80470
Au        12.68980        1.85030       -3.81550
Au        13.46790       -2.72320       -1.79580
Au        14.31770        0.26600       -2.07900
Au        13.24370        3.88110        2.11040
Au        16.81100       -1.25960        3.53270
Au        14.68360       -3.02760        2.71040
Au        16.16950        3.79890        1.81620
Au        17.33590       -0.66910       -3.32520
Au        15.15050       -4.22860        0.05170
Au        15.67920       -1.44710       -0.28080
Au        17.03430        4.03650       -0.90570
Au        14.72090       -1.60900       -4.17590
Au        15.17030        0.32710        1.78060
Au        11.03580        1.08800       -1.62040
Au        10.84580       -2.11400       -0.89360
Au        12.00700       -0.87320       -3.37750
Au        17.38870        1.56090        3.10970
Au        16.25750       -3.24300       -2.45520
Au        12.94130       -0.62560        0.24760
Au        12.57410       -3.57720        0.86690
Au        14.76950        2.27510        3.85010
Au        12.42910        1.11650        2.58470
Au        15.40670        1.13230       -4.58940
Au        12.22250        3.77790       -1.70660
Au        16.46790        1.26250       -0.53420
Au        18.26630       -0.36330        1.22320
Au        10.20800        0.03750        0.99960
Au        14.89300        3.20860       -2.58200
Au        19.15580        0.62180       -1.33630
Au        17.29480       -3.08690        1.44580
Au        11.06990        2.73030        0.67830
Au        17.51960        2.17690       -3.03150
Au        14.44040        4.92420       -0.24450
Au        14.18380       -0.56810        4.27160
Au        13.82190        2.09180       -0.01880
Au        18.38160       -2.07330       -1.04880
C          7.91650       -3.62520       -2.37480
C          7.94840       -3.82370       -3.76830
C          7.51830       -5.03530       -4.29990
C          7.45240       -4.67710       -1.54870
C          7.00410       -5.87490       -2.10570
C          7.03860       -6.06800       -3.49440
O          7.38850       -4.51540       -0.19690
H          8.35410       -3.04430       -4.41250
H          6.66110       -6.66840       -1.44200
H          6.71820       -7.01290       -3.93350
C          8.43510       -3.65220        0.39210
C          8.74350       -2.41620       -0.39790
C          8.39210       -2.41350       -1.73500
H          8.52630       -1.52520       -2.36270
H          9.34320       -4.26550        0.54340
H          8.01820       -3.39800        1.37300
C          7.55260       -0.92570        1.93380
C          8.17220       -0.52590        0.76360
H          8.08460       -1.52960        2.67560
C          7.37810        0.38510       -0.13030
H          7.64760        1.43840        0.08200
O          5.91800        0.25120       -0.00230
H          7.56240        0.18970       -1.19110
C          5.46450        0.20980        1.28330
C          6.24560       -0.43190        2.28310
C          4.20310        0.72830        1.57440
C          3.66760        0.60640        2.86520
C          4.43010       -0.03670        3.83850
C          5.70170       -0.54000        3.58150
H          6.28780       -1.02020        4.36440
H          2.68080        1.00670        3.09820
H          3.65050        1.22660        0.77680
Br         3.67370       -0.24020        5.62810
Br         7.65770       -5.32600       -6.22360
18
Pr-Br       -92.87405  eV    ;   -93.07852   eV
C          8.26730       -3.57890       -1.91010
C          7.68910       -3.20960       -3.13420
C          7.66420       -4.11450       -4.19260
C          8.80940       -4.87760       -1.77720
C          8.79510       -5.76750       -2.85210
C          8.21430       -5.39010       -4.06650
O          9.44410       -5.27150       -0.62750
H          8.92400       -2.48700        1.27870
H          7.27470       -2.20830       -3.25490
H          9.23980       -6.75510       -2.72760
H          8.19570       -6.08410       -4.90570
C          9.03800       -4.60800        0.59310
C          8.79880       -3.13940        0.41290
C          8.39660       -2.66900       -0.78120
H          8.18680       -1.60850       -0.93380
H          9.85310       -4.80510        1.30200
H          8.12730       -5.10910        0.98130
Br         6.88040       -3.57300       -5.87040
34
Prd-Br     -181.04436  eV    ;   -181.40273  eV
C          7.79350       -3.44460       -2.30210
C          8.31630       -3.37380       -3.60750
C          8.70220       -4.53710       -4.26360
C          7.68740       -4.71230       -1.68440
C          8.04160       -5.87490       -2.36910
C          8.55860       -5.79130       -3.66480
O          7.14280       -4.83400       -0.43540
H          8.40960       -2.40660       -4.10100
H          7.91360       -6.83900       -1.87710
H          8.85310       -6.69290       -4.20040
C          7.27490       -3.68110        0.42410
C          6.94870       -2.37480       -0.27020
C          7.27290       -2.29800       -1.59550
H          7.13310       -1.37830       -2.16460
H          8.30470       -3.65710        0.83000
H          6.58390       -3.88490        1.24940
C          6.29780       -1.28270        1.86220
C          6.42430       -1.27150        0.50180
H          6.57590       -2.15540        2.45450
C          6.08810        0.03070       -0.19480
H          6.98870        0.67140       -0.26760
O          5.04010        0.77810        0.45970
H          5.70110       -0.14010       -1.20560
C          5.13530        0.87510        1.82110
C          5.77880       -0.13630        2.57030
C          4.50280        1.94420        2.45660
C          4.54630        2.05160        3.84910
C          5.21180        1.07280        4.59140
C          5.81490       -0.01610        3.97260
H          6.30900       -0.78480        4.56750
H          4.07170        2.89310        4.35070
H          3.98940        2.69250        1.85240
Br         5.30180        1.23520        6.51050
Br         9.45260       -4.40780       -6.03530
21
Sub-Me     -105.50593 eV ; -105.77093 eV 
C          6.09540       -6.30830        0.48530
C          5.64250       -7.19600        1.45560
C          6.36320       -7.42220        2.64030
C          7.29740       -5.61250        0.67510
C          8.03630       -5.81890        1.84830
C          7.56170       -6.71810        2.80970
O          7.64830       -4.76150       -0.34840
H          5.53360       -6.13710       -0.43380
H          4.70340       -7.72890        1.29040
H          8.97480       -5.29530        2.02630
H          8.14830       -6.87030        3.71940
C          8.87470       -4.02980       -0.19610
C          9.07640       -3.20720       -1.37860
C          9.26260       -2.52010       -2.36010
H          9.42530       -1.91310       -3.22680
H          9.72200       -4.72720       -0.07290
H          8.82840       -3.39200        0.70450
C          5.86960       -8.38800        3.68600
H          5.72060       -7.89140        4.65670
H          4.91290       -8.83750        3.39000
H          6.58600       -9.20750        3.84770
59
IM1-Me     -190.80591 eV ; -191.06436 eV 
Au        18.91750        2.23780        1.41960
Au        12.16590       -2.16440        2.55850
Au        13.06670        2.21300       -3.50000
Au        13.84050       -2.68210       -2.16070
Au        14.66580        0.38100       -1.91100
Au        13.42890        3.38980        2.78360
Au        16.93670       -1.86590        3.54650
Au        14.80900       -3.26820        2.22590
Au        16.27880        3.15540        2.36390
Au        17.55560       -0.36050       -2.89220
Au        15.43600       -4.33900       -0.37660
Au        16.04680       -1.54170       -0.32340
Au        17.34360        4.01590       -0.13920
Au        15.16170       -1.22820       -4.25990
Au        15.31230       -0.11440        1.96320
Au        11.54440        1.02140       -1.35490
Au        11.11210       -1.89970       -1.36820
Au        12.45200       -0.56890       -3.55160
Au        17.54450        0.89460        3.52110
Au        16.65390       -3.07700       -2.66530
Au        13.26210       -0.93060        0.15210
Au        12.74710       -3.74850        0.30170
Au        14.91220        1.50070        4.30800
Au        12.49150        0.65920        3.03660
Au        15.77800        1.56730       -4.21450
Au        12.51900        3.73910       -1.13540
Au        16.70490        1.20970       -0.11100
Au        18.58060       -0.72360        1.46160
Au        10.63660       -0.27820        1.09740
Au        15.22770        3.40070       -1.99040
Au        19.40760        0.62510       -0.91030
Au        17.55240       -3.42410        1.25760
Au        11.30700        2.48320        1.13010
Au        17.86360        2.43280       -2.44810
Au        14.64380        4.67930        0.54480
Au        14.23910       -1.29800        4.30030
Au        14.00750        1.84620        0.43010
Au        18.78960       -2.17760       -1.00330
C          6.15380       -6.28150        0.45340
C          5.66830       -7.16540        1.41350
C          6.35990       -7.40220        2.61370
C          7.35710       -5.60300        0.67800
C          8.07050       -5.81770        1.86320
C          7.56270       -6.71310        2.81200
O          7.74600       -4.74460       -0.33270
H          5.61640       -6.10680       -0.47840
H          4.72710       -7.68850        1.23270
H          9.01350       -5.31220        2.06420
H          8.12480       -6.87520        3.73510
C          8.97980       -4.05660       -0.12850
C          9.20060       -3.18380       -1.28070
C          9.16480       -2.52880       -2.33500
H          8.85420       -2.10240       -3.27230
H          9.82460       -4.76450       -0.03430
H          8.95300       -3.44680        0.79200
C          5.83000       -8.35970        3.65030
H          5.62480       -7.84210        4.60010
H          4.89570       -8.82740        3.31080
H          6.55560       -9.16010        3.86150
59
IM2-Me     -190.94253 eV ; -191.31439 eV 
Au        19.05620        2.10840        0.69240
Au        12.31110       -1.43930        3.34130
Au        12.79630        1.45180       -3.51710
Au        13.45960       -3.11890       -1.20940
Au        14.46330       -0.11100       -1.73850
Au        13.83710        3.94240        2.22510
Au        17.18660       -1.23670        3.83080
Au        14.86120       -2.68530        2.95950
Au        16.60120        3.43330        1.63250
Au        17.18800       -1.23180       -2.80050
Au        15.16400       -4.43030        0.70220
Au        15.88870       -1.72830        0.10560
Au        17.41960        3.64010       -1.08670
Au        14.64670       -2.22070       -3.70260
Au        15.44100        0.22490        2.05230
Au        11.44900        0.86710       -1.03250
Au        10.76130       -1.98850       -0.30220
Au        12.09740       -1.23230       -2.83140
Au        17.88440        1.39960        3.16370
Au        16.21380       -3.77380       -1.88840
Au        13.16350       -0.84990        0.64590
Au        12.55330       -3.56700        1.49730
Au        15.37390        2.33330        4.00590
Au        12.81510        1.38600        3.14670
Au        15.37950        0.49030       -4.34850
Au        12.53200        3.51790       -1.55440
Au        16.69240        0.94450       -0.38700
Au        18.70960       -0.70890        1.43530
Au        10.67490        0.18160        1.69380
Au        15.12490        2.83990       -2.59450
Au        19.27160        0.03810       -1.27470
Au        17.49480       -3.28550        1.88370
Au        11.50990        2.83210        1.03830
Au        17.65410        1.58060       -3.02100
Au        14.85540        4.65220       -0.34060
Au        14.58280       -0.35740        4.68240
Au        14.10230        1.89300        0.23520
Au        18.54430       -2.65570       -0.68360
C          6.62950       -3.15800       -1.56080
C          5.68660       -2.71770       -2.62590
C          5.15930       -3.56500       -3.55990
C          6.96540       -4.60680       -1.61380
C          6.43610       -5.45050       -2.58640
C          5.54030       -4.94500       -3.52670
O          7.82630       -5.09210       -0.72540
H          6.14850       -2.96420       -0.57200
H          5.41510       -1.66040       -2.62870
H          6.74130       -6.49810       -2.59570
H          5.12220       -5.62210       -4.27340
C          8.55800       -4.10040        0.09630
C          8.91460       -2.86030       -0.66240
C          7.97730       -2.38660       -1.49390
H          8.08920       -1.51200       -2.13500
H          9.41930       -4.66510        0.46330
H          7.90300       -3.85370        0.95180
C          4.20290       -3.07860       -4.61510
H          4.68060       -3.06710       -5.60570
H          3.32300       -3.73420       -4.68590
H          3.85580       -2.06190       -4.39490
59
IM3-Me     -191.41212 eV ; -191.63015 eV 
Au        19.07230        2.26320        0.29740
Au        12.37080       -0.95040        3.30520
Au        12.64970        1.79420       -3.60370
Au        13.09230       -2.76160       -1.30840
Au        14.30140        0.16730       -1.91620
Au        14.06820        4.27840        2.06990
Au        17.21100       -0.92300        3.51090
Au        14.81810       -2.33660        2.82140
Au        16.79170        3.71070        1.37070
Au        16.96870       -1.00810       -3.15840
Au        14.89640       -4.06520        0.51040
Au        15.72160       -1.40060       -0.04800
Au        17.43970        3.84770       -1.42490
Au        14.22900       -1.86040       -3.90500
Au        15.48070        0.65320        1.83500
Au        11.37410        1.38880       -1.07940
Au        10.50480       -1.40010       -0.33800
Au        11.75970       -0.83450       -2.82830
Au        18.06600        1.66980        2.85030
Au        15.81560       -3.38750       -2.10530
Au        13.09350       -0.43730        0.53730
Au        12.39810       -3.08640        1.48230
Au        15.61790        2.68950        3.84270
Au        12.91260        1.85720        3.10220
Au        15.15240        0.77880       -4.53840
Au        12.54890        3.94950       -1.66870
Au        16.63130        1.19510       -0.69530
Au        18.65740       -0.50740        1.06590
Au        10.73720        0.65180        1.62320
Au        15.05940        3.15520       -2.82850
Au        19.19450        0.24010       -1.65260
Au        17.34720       -3.03510        1.59360
Au        11.62020        3.31850        1.02840
Au        17.52590        1.78000       -3.36410
Au        14.97720        4.95300       -0.52540
Au        14.72460        0.05860        4.49350
Au        14.10290        2.24960        0.01230
Au        18.26100       -2.39910       -1.05280
C          7.07680       -2.88080       -2.18310
C          6.29840       -2.54900       -3.30070
C          5.86900       -3.50390       -4.22720
C          7.44820       -4.21920       -1.99350
C          7.04560       -5.19400       -2.91710
C          6.26620       -4.83530       -4.01300
O          8.22370       -4.65410       -0.94710
H          6.77120       -1.57920       -0.49530
H          6.02820       -1.50010       -3.45540
H          7.35780       -6.22750       -2.75490
H          5.95500       -5.60700       -4.71980
C          8.52840       -3.67430        0.08800
C          8.75290       -2.30740       -0.46150
C          7.57790       -1.80940       -1.22490
H          7.78680       -0.87520       -1.76190
H          9.39730       -4.08490        0.61140
H          7.66840       -3.64330        0.78900
C          5.04310       -3.11500       -5.42430
H          5.62960       -3.17850       -6.35320
H          4.17290       -3.77660       -5.54330
H          4.67480       -2.08540       -5.33280
59
IM4-Me     -192.78404 eV ; -193.06797 eV
Au        19.11470        2.16270        0.59360
Au        12.35380       -1.40960        3.38750
Au        12.69470        1.43580       -3.44440
Au        13.39810       -3.08840       -1.16180
Au        14.47900       -0.10220       -1.74150
Au        13.88700        3.90630        2.20210
Au        17.14380       -1.23150        3.78120
Au        14.84530       -2.83980        3.17480
Au        16.68930        3.57600        1.64870
Au        17.16000       -1.30440       -2.92420
Au        15.11600       -4.41050        0.73720
Au        15.84850       -1.72690        0.14110
Au        17.38360        3.62160       -1.10840
Au        14.52690       -2.19990       -3.67290
Au        15.39080        0.24890        2.06570
Au        11.21450        0.90410       -1.03680
Au        10.78540       -2.00880       -0.23150
Au        11.98350       -1.19920       -2.75010
Au        17.88620        1.40540        3.03030
Au        16.10000       -3.77030       -1.90050
Au        13.15090       -0.79950        0.64880
Au        12.58090       -3.51640        1.58300
Au        15.44530        2.36980        4.00390
Au        12.86900        1.39640        3.15020
Au        15.27260        0.48270       -4.37680
Au        12.48020        3.52590       -1.51460
Au        16.69630        0.94520       -0.32990
Au        18.56450       -0.72500        1.34300
Au        10.68710        0.20600        1.72230
Au        15.06150        2.79350       -2.54420
Au        19.20770       -0.01410       -1.33650
Au        17.43870       -3.33970        1.91630
Au        11.50360        2.83570        1.06430
Au        17.54960        1.51920       -3.01810
Au        14.85960        4.67460       -0.33200
Au        14.61720       -0.34320        4.71650
Au        14.08560        1.89950        0.19460
Au        18.43070       -2.70560       -0.72360
C          8.35170       -3.54450       -1.95590
C          7.74370       -3.18460       -3.17300
C          7.62690       -4.08210       -4.23630
C          8.86640       -4.85200       -1.81270
C          8.77970       -5.75980       -2.86890
C          8.16200       -5.37320       -4.05990
O          9.52390       -5.23600       -0.67200
H          8.67000       -2.56160        1.31650
H          7.35250       -2.17030       -3.28290
H          9.18830       -6.76260       -2.73830
H          8.08230       -6.09690       -4.87390
C          9.07160       -4.60620        0.54380
C          8.87830       -3.12140        0.40200
C          8.46110       -2.63600       -0.83320
H          8.06790       -1.62260       -0.93250
H          9.83640       -4.84830        1.29110
H          8.11300       -5.06950        0.85510
C          6.96040       -3.68320       -5.52670
H          7.67140       -3.69870       -6.36520
H          6.13830       -4.36880       -5.77900
H          6.54590       -2.67010       -5.45550
58
IM5-Me     -193.00939 eV ; -194.09136 eV 
Au        19.06490        2.51890        0.57590
Au        12.35500       -1.10130        3.20630
Au        12.85730        1.80620       -3.66050
Au        13.57100       -2.76240       -1.33770
Au        14.51130        0.25110       -1.86530
Au        13.84000        4.31800        2.09200
Au        17.23680       -0.83840        3.70320
Au        14.92640       -2.30340        2.81150
Au        16.61030        3.82710        1.50470
Au        17.26650       -0.83450       -2.92370
Au        15.26570       -4.06970        0.57430
Au        15.95110       -1.35330       -0.02580
Au        17.43610        4.03850       -1.21640
Au        14.74530       -1.85420       -3.83790
Au        15.48810        0.60470        1.91130
Au        11.52870        1.20840       -1.16860
Au        10.83460       -1.67660       -0.48830
Au        12.18570       -0.89530       -2.97760
Au        17.91030        1.80330        3.04670
Au        16.32970       -3.39540       -2.01880
Au        13.21370       -0.50490        0.52050
Au        12.63520       -3.23640        1.36960
Au        15.38600        2.71620        3.87290
Au        12.84600        1.73050        2.98000
Au        15.44830        0.86540       -4.47740
Au        12.56050        3.87820       -1.70280
Au        16.72450        1.32880       -0.53220
Au        18.79010       -0.30150        1.32390
Au        10.71300        0.49680        1.53050
Au        15.16010        3.23000       -2.73830
Au        19.33310        0.46070       -1.39230
Au        17.57510       -2.88340        1.75890
Au        11.52480        3.18330        0.89450
Au        17.70140        1.98580       -3.14880
Au        14.86180        5.03280       -0.47430
Au        14.61520        0.01700        4.53750
Au        14.13300        2.26350        0.10320
Au        18.63240       -2.23750       -0.80180
C          7.09880       -2.99090       -2.41410
C          6.13010       -2.51220       -3.30910
C          5.05540       -3.29830       -3.75050
C          6.97620       -4.31680       -1.93800
C          5.92000       -5.12100       -2.37130
C          4.97320       -4.61140       -3.26740
O          7.84780       -4.86030       -1.04290
H          6.22740       -1.48550       -3.67430
H          5.84870       -6.14230       -1.99390
H          4.15110       -5.25170       -3.59740
C          9.02820       -4.09710       -0.61520
C          9.14970       -2.68930       -1.11200
C          8.22640       -2.18610       -1.96110
H          8.30590       -1.16510       -2.34150
H          9.90480       -4.68720       -0.93140
H          8.99940       -4.11570        0.48530
C          4.04230       -2.74860       -4.72180
H          4.48080       -2.60000       -5.72190
H          3.18760       -3.43210       -4.82720
H          3.65730       -1.77390       -4.38540
79
IM6-Me     -299.05269 eV ; -300.41581 eV 
Au        18.79610        3.01140        1.18560
Au        12.70670       -1.85280        2.83350
Au        13.08030        1.32500       -3.51800
Au        14.39810       -3.28280       -1.21470
Au        15.01620        0.23070       -1.72220
Au        13.21590        3.71290        2.28740
Au        17.18750       -0.76940        4.03200
Au        15.38610       -2.79860        3.10940
Au        16.07820        3.83330        1.98090
Au        18.00200       -0.60690       -2.80970
Au        16.23300       -4.28750        0.74460
Au        16.18160       -1.46660        0.19250
Au        16.98210        4.07550       -0.71330
Au        15.51450       -1.87760       -3.50710
Au        15.26390        0.25170        2.13670
Au        11.29750        0.66380       -1.34960
Au        11.58440       -3.01080       -0.54080
Au        12.81410       -1.36470       -2.62200
Au        17.54390        1.92480        3.47590
Au        17.27310       -3.24830       -1.77320
Au        13.28010       -0.87890        0.26330
Au        13.50650       -4.11540        1.45460
Au        14.83760        2.29090        4.12800
Au        12.56220        0.97880        2.86790
Au        15.86100        0.83230       -4.35420
Au        12.28790        3.38100       -1.65840
Au        16.83710        1.30990        0.07170
Au        18.96680        0.13240        1.82660
Au        10.68110       -0.51520        1.17160
Au        15.00690        3.14050       -2.49440
Au        19.52860        1.11750       -0.91250
Au        18.04470       -2.56820        2.05400
Au        11.17360        2.40730        0.79060
Au        17.66620        2.18200       -2.67390
Au        14.28730        4.76170       -0.14100
Au        14.38840       -0.52920        4.68580
Au        14.04610        1.95260        0.22370
Au        19.06450       -1.60170       -0.36810
C          8.64580       -5.46670       -2.67050
C          7.76870       -5.36510       -3.76150
C          7.06810       -6.47030       -4.26640
C          8.82490       -6.73570       -2.07040
C          8.13320       -7.84780       -2.55120
C          7.26330       -7.70860       -3.64040
O          9.60920       -6.88600       -0.95930
H          7.62740       -4.38400       -4.22460
H          8.28080       -8.81220       -2.06080
H          6.72780       -8.58500       -4.01290
C         10.69300       -5.92080       -0.79530
C         10.35220       -4.51340       -1.19970
C          9.36780       -4.33010       -2.11040
H          9.11230       -3.33460       -2.48130
H         11.56670       -6.27280       -1.37900
H         10.94970       -5.99280        0.26810
C          8.95820       -1.17100        2.43770
C          8.46840       -0.57280        1.45560
H          9.05110       -1.72140        3.35710
C          7.51690       -0.02070        0.49370
H          7.56250        1.08180        0.52050
O          6.20360       -0.49450        0.84210
H          7.78820       -0.34660       -0.52400
C          5.20190       -0.23570       -0.06240
C          5.32450        0.60820       -1.17500
C          3.97820       -0.87310        0.18930
C          2.89690       -0.66390       -0.66360
C          2.99120        0.17900       -1.78310
C          4.22260        0.80220       -2.01650
H          4.33380        1.46300       -2.87970
H          1.95210       -1.17240       -0.45940
H          3.90250       -1.53240        1.05650
H          6.26020        1.12140       -1.39670
C          1.82030        0.38810       -2.70880
H          0.88420        0.03890       -2.25200
H          1.69550        1.45080       -2.96330
H          1.95410       -0.15920       -3.65550
C          6.14130       -6.32050       -5.44650
H          6.69730       -6.14160       -6.38120
H          5.53370       -7.22460       -5.59170
H          5.45450       -5.47180       -5.30920
79
IM7-Me     -298.94640 eV ; -300.39870 eV
Au        18.81630        2.88410        0.82060
Au        12.43160       -1.62340        2.86910
Au        13.10990        1.60230       -3.88230
Au        13.95890       -2.81260       -1.47760
Au        14.69510        0.07920       -1.99250
Au        13.45590        3.98850        1.95350
Au        17.13480       -0.72650        3.63160
Au        15.14160       -2.60250        2.84090
Au        16.29890        4.05350        1.69500
Au        17.76780       -0.56210       -3.07090
Au        15.64230       -4.11440        0.43500
Au        16.00440       -1.33230        0.03870
Au        17.13650        4.15550       -1.03290
Au        15.33570       -1.76450       -4.08040
Au        15.40050        0.67360        1.81930
Au        11.60280        0.77950       -1.58060
Au        11.17860       -2.15210       -1.06960
Au        12.61520       -1.17190       -3.42390
Au        17.61610        1.99780        3.18830
Au        16.75840       -3.10320       -2.05550
Au        13.18990       -0.65940        0.34620
Au        13.07030       -3.96980        1.54050
Au        14.93630        2.58940        3.87640
Au        12.63820        1.24270        2.60730
Au        15.81070        1.00740       -4.51360
Au        12.41690        3.59770       -1.96930
Au        16.76350        1.35170       -0.55770
Au        18.79170        0.04640        1.44030
Au        10.51980       -0.15860        1.06450
Au        15.14880        3.27470       -2.80090
Au        19.51420        0.95020       -1.20920
Au        17.81060       -2.70510        1.71790
Au        11.37430        2.66970        0.52280
Au        17.82940        2.30180       -3.05110
Au        14.48830        4.97910       -0.48260
Au        14.43760       -0.23590        4.31970
Au        14.11000        2.14550       -0.16690
Au        18.84410       -1.76790       -0.73790
C          8.73890       -5.06080       -3.29880
C          7.93360       -5.14380       -4.44590
C          7.43730       -6.36630       -4.92460
C          9.04860       -6.25650       -2.61060
C          8.56040       -7.48180       -3.06500
C          7.76120       -7.53090       -4.21310
O          9.76440       -6.23140       -1.44270
H          7.68730       -4.21830       -4.97480
H          8.81080       -8.38350       -2.50530
H          7.38780       -8.49700       -4.56140
C         10.71140       -5.13070       -1.30430
C         10.20220       -3.80490       -1.79680
C          9.25650       -3.80540       -2.76710
H          8.88440       -2.87390       -3.20160
H         11.64160       -5.39480       -1.84700
H         10.95000       -5.11300       -0.23130
C          7.75960       -1.10680        1.90920
C          8.45860       -0.15680        1.27340
H          8.19410       -1.97850        2.39760
C          7.65850        0.91980        0.60750
H          7.31850        1.66550        1.35030
O          6.44310        0.40940       -0.07200
H          8.19540        1.43880       -0.19210
C          5.82780       -0.62820        0.50230
C          6.20880       -0.99550        1.89640
C          4.90140       -1.36230       -0.22930
C          4.28140       -2.47690        0.33960
C          4.59260       -2.91190        1.66520
C          5.49840       -2.20170        2.40790
H          5.75080       -2.52190        3.42160
H          3.57250       -3.05330       -0.25810
H          4.70120       -1.06960       -1.26050
H          5.97780       -0.12610        2.55610
C          3.92790       -4.15020        2.21440
H          2.83280       -4.03700        2.25450
H          4.13960       -5.02840        1.58500
H          4.28010       -4.37290        3.23030
C          6.59410       -6.42580       -6.17620
H          7.21400       -6.46600       -7.08780
H          5.94900       -7.31740       -6.18360
H          5.94190       -5.54340       -6.26970
78
IM8-Me     -299.05084 eV ; -302.86570 eV
Au        18.97460        2.51870        0.55850
Au        12.40510       -1.13490        3.28170
Au        12.77490        1.81030       -3.74750
Au        13.47100       -2.64160       -1.34000
Au        14.37830        0.28790       -1.89410
Au        13.82350        4.31520        2.06000
Au        17.14070       -0.86620        3.67880
Au        14.89860       -2.59900        3.13780
Au        16.63790        3.97240        1.55190
Au        17.31950       -0.88830       -3.19410
Au        15.17390       -4.07740        0.56450
Au        15.70790       -1.34780        0.00110
Au        17.32710        3.97820       -1.20760
Au        14.65340       -1.77540       -3.86160
Au        15.43970        0.64830        1.88580
Au        11.36000        1.24380       -1.26920
Au        10.79720       -1.72590       -0.54570
Au        12.05400       -0.84860       -3.06810
Au        17.83090        1.80900        3.03900
Au        16.17530       -3.32750       -2.07080
Au        12.99560       -0.30720        0.56730
Au        12.69270       -3.11540        1.39970
Au        15.32240        2.76240        3.86120
Au        12.84420        1.66200        2.80310
Au        15.40880        0.86410       -4.55080
Au        12.47600        3.88450       -1.76570
Au        16.66260        1.25140       -0.58650
Au        18.59420       -0.27490        1.26150
Au        10.44830        0.43360        1.53650
Au        15.08370        3.14210       -2.70660
Au        19.29940        0.45810       -1.45890
Au        17.42740       -2.87720        1.74030
Au        11.50250        3.17490        0.80640
Au        17.62890        1.95270       -3.19120
Au        14.81340        5.09320       -0.49590
Au        14.61310        0.02540        4.51480
Au        14.13000        2.32690        0.02310
Au        18.38120       -2.14790       -0.84320
C          8.20830       -4.25110       -3.06340
C          7.57420       -4.21480       -4.31450
C          7.07380       -5.36790       -4.93900
C          8.32300       -5.50160       -2.41170
C          7.83400       -6.66060       -3.01520
C          7.21670       -6.59210       -4.26960
O          8.84700       -5.59200       -1.15240
H          7.47310       -3.24480       -4.81240
H          7.94610       -7.60990       -2.48910
H          6.85010       -7.51200       -4.73440
C          9.84000       -4.57500       -0.78960
C          9.58150       -3.19980       -1.33200
C          8.77570       -3.07570       -2.41420
H          8.59110       -2.10200       -2.87530
H         10.83540       -4.92320       -1.13140
H          9.84450       -4.58640        0.30780
C          7.70230       -0.20350        2.69060
C          8.41090        0.55770        1.82230
H          8.20120       -0.88150        3.38810
C          7.65210        1.41410        0.84940
H          8.14000        2.38370        0.68870
O          6.28710        1.76520        1.26020
H          7.59730        0.89850       -0.12930
C          5.58260        0.79820        1.92080
C          6.24510       -0.19320        2.68330
C          4.18860        0.85500        1.89430
C          3.43360       -0.07900        2.61610
C          4.05690       -1.07940        3.37580
C          5.46030       -1.11290        3.39510
H          5.97180       -1.87860        3.98720
H          2.34180       -0.02860        2.57900
H          3.70730        1.63550        1.30330
C          3.24820       -2.10350        4.13820
H          2.19820       -1.78950        4.24030
H          3.24990       -3.08460        3.63410
H          3.64850       -2.26470        5.15190
C          6.42160       -5.29310       -6.29940
H          7.15520       -5.41440       -7.11510
H          5.66350       -6.08100       -6.42610
H          5.92580       -4.32320       -6.45540
59
TS1/2-Me   -190.36148 eV ; -190.68496 eV
Au        19.04460        2.10970        0.69320
Au        12.29200       -1.44160        3.34220
Au        12.78430        1.44460       -3.52300
Au        13.44640       -3.13680       -1.22090
Au        14.45760       -0.11370       -1.74320
Au        13.82270        3.93530        2.21900
Au        17.16980       -1.24090        3.83000
Au        14.84350       -2.69450        2.95480
Au        16.58410        3.42780        1.62710
Au        17.17710       -1.23690       -2.80260
Au        15.14640       -4.44040        0.70190
Au        15.87810       -1.73500        0.10210
Au        17.41540        3.63070       -1.08430
Au        14.63360       -2.22280       -3.70670
Au        15.42150        0.21850        2.04980
Au        11.42550        0.86050       -1.04480
Au        10.81020       -2.00570       -0.29220
Au        12.08430       -1.23290       -2.84820
Au        17.87030        1.39130        3.15520
Au        16.19870       -3.77700       -1.89030
Au        13.16750       -0.84600        0.65540
Au        12.52120       -3.57050        1.48030
Au        15.35850        2.32630        4.00300
Au        12.79790        1.38280        3.14150
Au        15.36910        0.48430       -4.35390
Au        12.51960        3.51130       -1.56000
Au        16.68220        0.94040       -0.39020
Au        18.69350       -0.71070        1.43380
Au        10.65710        0.17620        1.68780
Au        15.11330        2.83490       -2.59660
Au        19.26090        0.03450       -1.27860
Au        17.48040       -3.29190        1.88320
Au        11.49270        2.82960        1.02950
Au        17.64310        1.57220       -3.02640
Au        14.84190        4.64940       -0.34640
Au        14.56580       -0.36080        4.67850
Au        14.08840        1.89030        0.22890
Au        18.52720       -2.66300       -0.68250
C          6.22710       -3.27740       -1.49860
C          5.38090       -2.81900       -2.53600
C          5.03650       -3.62570       -3.61300
C          6.75890       -4.58860       -1.57880
C          6.38300       -5.42910       -2.63860
C          5.51570       -4.95840       -3.61730
O          7.65990       -5.08800       -0.69180
H          6.23730       -2.74670       -0.54630
H          5.00270       -1.79440       -2.47860
H          6.77080       -6.44850       -2.66620
H          5.20170       -5.63160       -4.41740
C          8.48550       -4.18100        0.08110
C          8.92460       -2.98120       -0.68690
C          8.29750       -2.30660       -1.56420
H          8.21410       -1.50530       -2.28090
H          9.32950       -4.79810        0.40540
H          7.93610       -3.84680        0.97660
C          4.15230       -3.13730       -4.72970
H          4.65930       -3.23140       -5.70230
H          3.22380       -3.72510       -4.78810
H          3.87530       -2.08340       -4.59010
59
TS2/3-Me   -189.95918 eV ; -190.40333 eV
Au        19.06690        1.99150        0.52930
Au        12.35500       -1.39860        3.44270
Au        12.63090        1.49100       -3.40900
Au        13.22050       -3.08680       -1.15380
Au        14.32940       -0.12660       -1.72540
Au        13.96720        3.91840        2.30210
Au        17.20990       -1.30670        3.71160
Au        14.84020       -2.72290        2.96540
Au        16.69680        3.37160        1.59810
Au        16.98120       -1.27930       -2.92030
Au        14.99350       -4.44800        0.65700
Au        15.76300       -1.75170        0.08980
Au        17.37840        3.57120       -1.16480
Au        14.33270       -2.18960       -3.70980
Au        15.43850        0.23430        2.03490
Au        11.34590        0.97600       -0.89340
Au        10.61720       -1.83580       -0.07290
Au        11.84230       -1.16440       -2.69020
Au        17.98650        1.30760        3.05250
Au        15.93710       -3.76380       -1.95870
Au        13.10080       -0.81580        0.71380
Au        12.46230       -3.54130        1.60710
Au        15.54150        2.29980        4.03670
Au        12.89680        1.43080        3.27280
Au        15.15410        0.49380       -4.35840
Au        12.49020        3.58470       -1.43260
Au        16.62920        0.89050       -0.45520
Au        18.64610       -0.81210        1.26700
Au        10.70390        0.28160        1.84910
Au        15.02110        2.84110       -2.58740
Au        19.17550       -0.04360       -1.44490
Au        17.40120       -3.37500        1.75670
Au        11.55560        2.91820        1.21190
Au        17.50230        1.52420       -3.12290
Au        14.88440        4.63930       -0.28490
Au        14.68900       -0.36680        4.69250
Au        14.08010        1.89890        0.24770
Au        18.34460       -2.72040       -0.85890
C          6.79080       -3.17710       -1.77330
C          5.87370       -2.76110       -2.78850
C          5.35570       -3.66390       -3.70200
C          7.10800       -4.56740       -1.64730
C          6.59660       -5.46690       -2.58520
C          5.74270       -5.02120       -3.59320
O          7.98830       -5.01760       -0.73390
H          6.60210       -2.54050       -0.68900
H          5.62260       -1.69900       -2.85550
H          6.89910       -6.51200       -2.52020
H          5.38490       -5.73890       -4.33460
C          8.48390       -4.06050        0.26950
C          8.78450       -2.70770       -0.31110
C          7.82640       -2.20690       -1.15840
H          7.81080       -1.19520       -1.56000
H          9.37080       -4.54720        0.68820
H          7.71590       -3.97060        1.06290
C          4.46470       -3.21630       -4.83570
H          5.02330       -3.25780       -5.78500
H          3.58260       -3.86750       -4.94410
H          4.11580       -2.18370       -4.69220
59
TS3/4-Me   -190.79752 eV ; -191.20215 eV
Au        19.10280        2.26070        0.14800
Au        12.30160       -0.86450        3.29160
Au        12.51040        1.88920       -3.43200
Au        13.06930       -2.68520       -1.12040
Au        14.25170        0.26780       -1.80500
Au        14.12250        4.38720        2.02930
Au        17.19200       -0.93980        3.45590
Au        14.77340       -2.34390        2.88030
Au        16.82710        3.76760        1.27220
Au        16.83690       -1.08090       -3.14540
Au        14.83240       -4.16000        0.59160
Au        15.65330       -1.43800       -0.06400
Au        17.43200        3.85330       -1.50590
Au        14.10690       -1.84740       -3.68860
Au        15.45450        0.63380        1.79720
Au        11.12890        1.54740       -0.93460
Au        10.56270       -1.42790        0.09860
Au        11.69710       -0.67940       -2.55740
Au        18.05460        1.63330        2.70200
Au        15.71910       -3.50910       -2.05310
Au        13.00430       -0.28730        0.63130
Au        12.38480       -3.14090        1.61830
Au        15.68380        2.72920        3.74810
Au        13.01370        1.91610        2.97560
Au        14.97190        0.77560       -4.48110
Au        12.51090        4.05070       -1.57310
Au        16.63600        1.17420       -0.69620
Au        18.52180       -0.54810        0.94020
Au        10.60680        0.91710        1.79580
Au        14.99230        3.16380       -2.78300
Au        19.09800        0.11480       -1.78840
Au        17.25790       -3.08680        1.58000
Au        11.57200        3.51690        1.07150
Au        17.41080        1.72050       -3.39250
Au        14.99210        5.05660       -0.58590
Au        14.70760        0.08370        4.46820
Au        14.11700        2.35830        0.05900
Au        18.18760       -2.53590       -1.07740
C          7.23590       -2.93250       -2.28500
C          6.38830       -2.55370       -3.34190
C          5.87630       -3.49360       -4.23290
C          7.53800       -4.30080       -2.09090
C          7.04090       -5.25720       -2.98480
C          6.22980       -4.84480       -4.03670
O          8.36770       -4.70760       -1.08720
H          7.69220       -1.64570       -0.35690
H          6.14770       -1.49370       -3.47520
H          7.31620       -6.30230       -2.85050
H          5.86140       -5.59670       -4.73710
C          8.45190       -3.77870        0.03580
C          8.83550       -2.39150       -0.42580
C          8.02950       -1.97490       -1.53080
H          8.20320       -0.98390       -1.96190
H          9.20650       -4.21350        0.69510
H          7.47810       -3.76320        0.55800
C          5.04970       -3.09000       -5.42460
H          5.65750       -3.14450       -6.34280
H          4.18620       -3.75670       -5.56750
H          4.67490       -2.06030       -5.33590
79
TS6/7-Me   -298.39933 eV ; -299.86250 eV
Au        18.80450        2.88150        0.82810
Au        12.41830       -1.62820        2.86750
Au        13.09000        1.59970       -3.86660
Au        13.95040       -2.81190       -1.47960
Au        14.68360        0.08170       -1.98850
Au        13.43370        3.98390        1.96630
Au        17.11820       -0.73560        3.63930
Au        15.12850       -2.61570        2.86030
Au        16.28480        4.04740        1.70940
Au        17.75230       -0.56070       -3.06700
Au        15.62510       -4.11860        0.44300
Au        15.99780       -1.33410        0.04380
Au        17.11800        4.15130       -1.02180
Au        15.32250       -1.76630       -4.07750
Au        15.38400        0.67140        1.82890
Au        11.56620        0.78300       -1.57660
Au        11.15810       -2.15350       -1.06660
Au        12.59660       -1.16690       -3.41880
Au        17.60250        1.98850        3.19690
Au        16.74500       -3.10700       -2.05250
Au        13.20470       -0.67440        0.34060
Au        13.05750       -3.98540        1.56220
Au        14.92030        2.57980        3.88570
Au        12.62570        1.24360        2.62330
Au        15.79400        1.00620       -4.50370
Au        12.39580        3.59780       -1.95480
Au        16.75380        1.34470       -0.54960
Au        18.76830        0.04260        1.44470
Au        10.55310       -0.12320        1.04540
Au        15.13290        3.26650       -2.78980
Au        19.50370        0.94840       -1.20610
Au        17.79240       -2.71530        1.72560
Au        11.33450        2.66630        0.53600
Au        17.82170        2.30180       -3.04270
Au        14.47160        4.96960       -0.47000
Au        14.42230       -0.24840        4.33190
Au        14.10200        2.15030       -0.15900
Au        18.82220       -1.76340       -0.73000
C          8.69710       -5.05850       -3.27990
C          7.88970       -5.13840       -4.42540
C          7.39390       -6.35860       -4.91060
C          9.01270       -6.25760       -2.60060
C          8.52040       -7.48080       -3.05630
C          7.71720       -7.52580       -4.20240
O          9.73790       -6.24020       -1.43970
H          7.64060       -4.20980       -4.94900
H          8.77190       -8.38620       -2.50160
H          7.34060       -8.49070       -4.55170
C         10.67280       -5.12960       -1.28540
C         10.16370       -3.80500       -1.77900
C          9.21520       -3.80450       -2.74600
H          8.84440       -2.87300       -3.18140
H         11.61610       -5.38390       -1.81040
H         10.89520       -5.11320       -0.20860
C          8.01230       -1.22190        1.80100
C          8.42380       -0.15760        1.21550
H          8.25130       -2.19490        2.20520
C          7.56380        0.94130        0.67970
H          7.33160        1.64980        1.49460
O          6.32550        0.45700        0.08250
H          8.05090        1.49450       -0.12920
C          5.69560       -0.59690        0.65690
C          5.84190       -0.92750        2.03040
C          4.92510       -1.42010       -0.17920
C          4.30600       -2.55440        0.33840
C          4.45660       -2.92600        1.69700
C          5.18980       -2.08470        2.52490
H          5.31030       -2.33330        3.58370
H          3.70350       -3.18320       -0.32410
H          4.83970       -1.16160       -1.23590
H          6.16020       -0.15820        2.73630
C          3.81310       -4.19170        2.20520
H          2.71400       -4.12760        2.15870
H          4.11690       -5.05600        1.59440
H          4.09570       -4.39440        3.24760
C          6.56170       -6.40970       -6.16780
H          7.19600       -6.44260       -7.06940
H          5.91650       -7.30020       -6.18710
H          5.91520       -5.52340       -6.25600
78
TS8-Me     -297.47882 eV ; -301.36159 eV
Au        18.61590        2.53620        0.89100
Au        12.06200       -1.74200        2.80260
Au        12.61980        1.95300       -3.70370
Au        13.46580       -2.69350       -1.75080
Au        14.26950        0.33000       -2.00030
Au        13.19040        3.83510        2.24280
Au        16.74480       -1.26940        3.56820
Au        14.64810       -3.07180        2.73580
Au        16.11870        3.77540        1.93380
Au        17.31350       -0.59980       -3.31900
Au        15.13490       -4.21660        0.05540
Au        15.63820       -1.42400       -0.22110
Au        16.96580        4.06690       -0.79050
Au        14.67160       -1.51580       -4.11980
Au        15.10190        0.34000        1.84420
Au        10.89220        1.22020       -1.60710
Au        10.84230       -2.21730       -0.85050
Au        11.97590       -0.78330       -3.24920
Au        17.34190        1.52560        3.20870
Au        16.23170       -3.17160       -2.45750
Au        12.89670       -0.63320        0.28640
Au        12.54140       -3.67700        0.91170
Au        14.71450        2.22660        3.96270
Au        12.33680        1.07060        2.62620
Au        15.33310        1.22440       -4.50550
Au        12.16670        3.86780       -1.58200
Au        16.40400        1.28930       -0.45300
Au        18.24620       -0.35390        1.27450
Au        10.12380        0.00870        0.87560
Au        14.83250        3.29200       -2.47410
Au        19.09470        0.67180       -1.28090
Au        17.25410       -3.06300        1.47570
Au        10.99950        2.73930        0.76710
Au        17.44620        2.22950       -2.94410
Au        14.37600        4.95940       -0.09380
Au        14.10800       -0.59890        4.30720
Au        13.75070        2.12310        0.06760
Au        18.33110       -2.02300       -1.02450
C          7.75770       -3.73300       -2.69500
C          7.69880       -3.90440       -4.09310
C          7.22200       -5.08310       -4.68220
C          7.30580       -4.79730       -1.87400
C          6.81610       -5.97090       -2.44350
C          6.78060       -6.11440       -3.83580
O          7.29590       -4.65460       -0.51260
H          8.05610       -3.08790       -4.72800
H          6.48790       -6.77960       -1.78930
H          6.43330       -7.05480       -4.27200
C          8.44130       -3.89870        0.01040
C          8.75130       -2.62850       -0.73770
C          8.32640       -2.56920       -2.05210
H          8.53580       -1.69300       -2.67510
H          9.32540       -4.56180       -0.01300
H          8.18400       -3.70790        1.05950
C          7.62840       -1.23840        1.64630
C          8.16570       -0.79220        0.45580
H          8.21390       -1.87520        2.31800
C          7.31270        0.09460       -0.41290
H          7.68770        1.13250       -0.38180
O          5.87680        0.12960       -0.08640
H          7.32920       -0.24150       -1.45830
C          5.51360       -0.06340        1.21060
C          6.33410       -0.80090        2.10460
C          4.27320        0.41910        1.62750
C          3.81870        0.15520        2.92440
C          4.59500       -0.58510        3.83130
C          5.84630       -1.04620        3.40310
H          6.47970       -1.61920        4.08800
H          2.85090        0.55090        3.24060
H          3.67120        1.00630        0.93130
C          4.07690       -0.89160        5.21520
H          3.29890       -0.17230        5.50940
H          3.63040       -1.89900        5.27300
H          4.87620       -0.84920        5.97030
C          7.23280       -5.26850       -6.18090
H          8.15880       -5.76300       -6.51830
H          6.39130       -5.89200       -6.51760
H          7.17050       -4.30560       -6.70740
21
Pr-Me      -107.44956 eV ; -107.64235 eV
C          8.24350       -3.58000       -1.92390
C          7.65610       -3.21540       -3.14610
C          7.60690       -4.08940       -4.23690
C          8.78900       -4.87430       -1.79560
C          8.76730       -5.75650       -2.87650
C          8.17660       -5.36390       -4.07910
O          9.43560       -5.27050       -0.64990
H          8.95580       -2.47790        1.25220
H          7.23780       -2.20980       -3.24190
H          9.21300       -6.74450       -2.75860
H          8.15710       -6.06670       -4.91440
C          9.03810       -4.60380        0.57130
C          8.81220       -3.13280        0.39180
C          8.39360       -2.66840       -0.79960
H          8.18410       -1.60830       -0.95560
H          9.85090       -4.80950        1.27930
H          8.12280       -5.09500        0.96070
C          6.98520       -3.67580       -5.54560
H          7.73790       -3.62830       -6.34840
H          6.21380       -4.39110       -5.86980
H          6.51430       -2.68670       -5.47070
40
Prd-Me     -210.24594 eV ; -210.57850 eV
C          7.51910       -4.30750       -3.16050
C          7.98210       -4.15290       -4.48090
C          8.36270       -5.24530       -5.26470
C          7.45260       -5.61220       -2.62280
C          7.79090       -6.71830       -3.39820
C          8.24610       -6.52990       -4.70450
O          6.96080       -5.82160       -1.36050
H          8.03060       -3.14440       -4.90090
H          7.69490       -7.71510       -2.96710
H          8.52180       -7.40040       -5.30310
C          7.14310       -4.73060       -0.43470
C          6.78160       -3.38190       -1.01850
C          7.02960       -3.21540       -2.35070
H          6.86450       -2.25740       -2.84530
H          8.19530       -4.72920       -0.08790
H          6.50130       -4.99040        0.41420
C          6.26390       -2.43840        1.21940
C          6.31140       -2.33230       -0.14110
H          6.56730       -3.35430        1.72790
C          5.95110       -0.98420       -0.72700
H          6.85580       -0.35330       -0.82850
O          4.96570       -0.26400        0.04250
H          5.49300       -1.08790       -1.71710
C          5.14630       -0.26640        1.40180
C          5.80110       -1.34320        2.03930
C          4.58820        0.76740        2.15140
C          4.71340        0.75450        3.54250
C          5.37830       -0.28570        4.21220
C          5.90860       -1.32490        3.44080
H          6.41600       -2.15920        3.93380
H          4.28900        1.57750        4.12150
H          4.07170        1.57730        1.63570
C          5.49070       -0.29940        5.71470
H          5.38560        0.71020        6.13440
H          4.70670       -0.92580        6.16880
H          6.45860       -0.70310        6.04310
C          8.90430       -5.05550       -6.65760
H         10.00520       -5.02460       -6.65550
H          8.60300       -5.87750       -7.32180
H          8.55200       -4.11470       -7.10150
22
Sub-OMe    -110.01841  eV  ; -110.34470 eV
C          6.10590       -6.31980        0.36640
C          5.60460       -7.20450        1.32020
C          6.30830       -7.41720        2.51570
C          7.30850       -5.63810        0.58170
C          8.01600       -5.85370        1.77400
C          7.51320       -6.73850        2.72880
O          7.69710       -4.78550       -0.43150
H          5.56800       -6.14590       -0.56580
H          4.66510       -7.71790        1.12300
H          8.95780       -5.34540        1.97470
H          8.05190       -6.91090        3.66090
C          8.90920       -4.04670       -0.21710
C          9.12450       -3.15440       -1.34520
C          9.32360       -2.38740       -2.26270
H          9.48930       -1.71780       -3.08190
H          9.76410       -4.73850       -0.11060
H          8.83350       -3.45830        0.71540
O          5.90390       -8.26180        3.52430
C          4.67020       -8.95100        3.33490
H          4.71210       -9.62190        2.46140
H          4.51710       -9.54660        4.24170
H          3.82930       -8.24870        3.21520
60
IM1-OMe    -195.29526  eV  ; -195.61650 eV
Au        18.92420        2.24190        1.41960
Au        12.16400       -2.16380        2.55710
Au        13.06810        2.22290       -3.50550
Au        13.84490       -2.66620       -2.15950
Au        14.66740        0.38520       -1.91530
Au        13.43120        3.38830        2.78210
Au        16.93100       -1.86640        3.54370
Au        14.80550       -3.28250        2.23600
Au        16.28680        3.16780        2.37450
Au        17.55420       -0.35970       -2.89260
Au        15.43340       -4.33540       -0.38060
Au        16.04730       -1.53870       -0.32240
Au        17.34230        4.01440       -0.13560
Au        15.16530       -1.22350       -4.26760
Au        15.31290       -0.11160        1.96510
Au        11.55010        1.02430       -1.36050
Au        11.13060       -1.88880       -1.36610
Au        12.45580       -0.55860       -3.56260
Au        17.54630        0.89630        3.51660
Au        16.65060       -3.07480       -2.66770
Au        13.26740       -0.92290        0.15790
Au        12.75480       -3.74650        0.30550
Au        14.91470        1.50130        4.30650
Au        12.49280        0.65960        3.03660
Au        15.78000        1.57240       -4.21960
Au        12.51980        3.74170       -1.13710
Au        16.70750        1.21060       -0.10880
Au        18.57240       -0.72680        1.45990
Au        10.63600       -0.27400        1.09720
Au        15.22930        3.39680       -1.98740
Au        19.40580        0.62080       -0.90790
Au        17.54620       -3.43010        1.25800
Au        11.31100        2.48190        1.12570
Au        17.86500        2.43200       -2.44610
Au        14.64620        4.68020        0.54900
Au        14.23630       -1.30010        4.29940
Au        14.01320        1.85060        0.42670
Au        18.78640       -2.18180       -1.00280
C          6.16570       -6.23280        0.39280
C          5.63190       -7.13520        1.31270
C          6.30470       -7.39310        2.51910
C          7.37170       -5.58100        0.66060
C          8.05070       -5.83050        1.86120
C          7.51330       -6.73430        2.78200
O          7.78740       -4.71500       -0.33610
H          5.66170       -6.02230       -0.55110
H          4.69010       -7.63000        1.08340
H          8.99410       -5.34050        2.09850
H          8.02720       -6.93420        3.72180
C          9.01860       -4.03130       -0.12200
C          9.24280       -3.16450       -1.28030
C          9.18160       -2.52520       -2.34320
H          8.86940       -2.10710       -3.28360
H          9.86580       -4.73660       -0.01880
H          8.98860       -3.41450        0.79480
O          5.86240       -8.26250        3.48830
C          4.64450       -8.96170        3.22140
H          4.73200       -9.59250        2.31960
H          4.47300       -9.60090        4.09380
H          3.79570       -8.26510        3.10860
60
IM2-OMe    -195.29428  eV  ; -195.70102 eV
Au        19.05440        2.10710        0.69070
Au        12.30770       -1.43590        3.33740
Au        12.79800        1.45200       -3.51350
Au        13.46290       -3.12010       -1.20320
Au        14.46360       -0.10820       -1.73850
Au        13.83740        3.94060        2.22510
Au        17.18270       -1.23540        3.82780
Au        14.85820       -2.68800        2.96300
Au        16.60450        3.43800        1.63470
Au        17.18900       -1.23160       -2.80780
Au        15.16450       -4.43570        0.70260
Au        15.88580       -1.72990        0.10320
Au        17.41950        3.63930       -1.08720
Au        14.64200       -2.21370       -3.70050
Au        15.44250        0.22720        2.05010
Au        11.44950        0.87130       -1.02800
Au        10.77850       -1.99740       -0.28500
Au        12.09530       -1.23100       -2.82010
Au        17.88660        1.40080        3.16420
Au        16.21270       -3.77240       -1.89320
Au        13.16880       -0.84790        0.65100
Au        12.55720       -3.57680        1.50910
Au        15.37480        2.33430        4.00440
Au        12.81180        1.38880        3.14550
Au        15.37980        0.49530       -4.35110
Au        12.53570        3.52160       -1.55560
Au        16.69260        0.94360       -0.38950
Au        18.70530       -0.70910        1.43250
Au        10.67100        0.18540        1.69220
Au        15.12710        2.84690       -2.60030
Au        19.27140        0.03680       -1.27780
Au        17.48850       -3.28440        1.88190
Au        11.50820        2.83790        1.03870
Au        17.65380        1.58110       -3.02200
Au        14.85690        4.65170       -0.33990
Au        14.57930       -0.35380        4.67740
Au        14.10300        1.89530        0.23370
Au        18.54020       -2.65550       -0.68730
C          6.65350       -3.15260       -1.57740
C          5.68990       -2.72600       -2.62720
C          5.14580       -3.61340       -3.51610
C          6.97890       -4.60470       -1.60700
C          6.45790       -5.46510       -2.56740
C          5.55390       -4.98560       -3.51350
O          7.83460       -5.08530       -0.70990
H          6.17640       -2.94490       -0.59070
H          5.37490       -1.68150       -2.65040
H          6.78260       -6.50530       -2.56980
H          5.18120       -5.65830       -4.28570
C          8.57070       -4.09690        0.10840
C          8.93150       -2.86220       -0.65530
C          8.00580       -2.38690       -1.49850
H          8.12990       -1.50600       -2.12870
H          9.43070       -4.66340        0.47840
H          7.92060       -3.84280        0.96610
O          4.23820       -3.13890       -4.44060
C          3.07150       -3.96010       -4.63360
H          2.37020       -3.34990       -5.21320
H          3.29300       -4.87890       -5.20120
H          2.61380       -4.21940       -3.66490
60
IM3-OMe    -195.95062  eV  ; -196.23516 eV
Au        19.13330        2.27760        0.24240
Au        12.43790       -0.84130        3.40330
Au        12.61040        1.81320       -3.48060
Au        13.06010       -2.72550       -1.17960
Au        14.30940        0.13230       -1.85560
Au        14.21320        4.28830        2.08820
Au        17.26950       -0.83930        3.48980
Au        14.87100       -2.26830        2.90080
Au        16.91850        3.76690        1.35070
Au        16.89480       -1.01190       -3.15780
Au        14.89920       -4.04700        0.60160
Au        15.71360       -1.37140        0.06270
Au        17.46650        3.83010       -1.46840
Au        14.10120       -1.86240       -3.86090
Au        15.52370        0.76490        1.86350
Au        11.33230        1.46400       -0.95390
Au        10.53560       -1.38970       -0.11860
Au        11.71770       -0.77180       -2.66650
Au        18.18820        1.71680        2.81040
Au        15.73000       -3.33710       -2.04160
Au        13.10340       -0.35850        0.62560
Au        12.43670       -3.01820        1.63170
Au        15.77570        2.74970        3.88000
Au        12.98120        1.97560        3.23430
Au        15.05550        0.77340       -4.50560
Au        12.57180        4.00140       -1.60190
Au        16.66420        1.18030       -0.70060
Au        18.70530       -0.49310        1.03730
Au        10.77300        0.74310        1.75180
Au        15.04520        3.19050       -2.84210
Au        19.18110        0.23540       -1.70540
Au        17.37910       -3.01320        1.63640
Au        11.72320        3.38820        1.12830
Au        17.46860        1.76490       -3.39760
Au        15.04460        4.97470       -0.52150
Au        14.81350        0.15210        4.53360
Au        14.15560        2.28530       -0.00580
Au        18.20060       -2.37920       -1.05060
C          7.07880       -2.94580       -2.22520
C          6.14310       -2.58650       -3.19760
C          5.51840       -3.55410       -3.99600
C          7.39690       -4.30360       -2.05370
C          6.78090       -5.27250       -2.85020
C          5.84380       -4.90690       -3.81820
O          8.34020       -4.73710       -1.14670
H          7.06470       -1.41870       -0.71360
H          5.89140       -1.53560       -3.35910
H          7.04980       -6.31950       -2.70470
H          5.37390       -5.68640       -4.41520
C          8.65820       -3.81320       -0.07440
C          8.89170       -2.41870       -0.54710
C          7.79600       -1.89010       -1.40650
H          8.15170       -1.06380       -2.03920
H          9.52480       -4.25700        0.42740
H          7.80780       -3.79840        0.64070
O          4.62040       -3.07910       -4.92280
C          3.98000       -4.04240       -5.75860
H          3.37410       -3.46880       -6.46930
H          4.71640       -4.64760       -6.31240
H          3.32210       -4.70590       -5.17190
60
IM4-OMe    -197.28155  eV  ; -197.63389 eV 
Au        19.09730        2.11600        0.57880
Au        12.42970       -1.40930        3.41610
Au        12.63720        1.45450       -3.38160
Au        13.37590       -3.04660       -1.12870
Au        14.40270       -0.10840       -1.72340
Au        13.95110        3.90200        2.21590
Au        17.19700       -1.26840        3.73850
Au        14.90930       -2.90910        3.23670
Au        16.76330        3.56460        1.64550
Au        17.19350       -1.34340       -3.14200
Au        15.13470       -4.39610        0.71120
Au        15.84440       -1.70680        0.11830
Au        17.41140        3.57370       -1.16230
Au        14.44980       -2.16690       -3.66370
Au        15.46900        0.27960        2.04900
Au        11.05700        0.97890       -1.02210
Au        10.79460       -2.00730       -0.16020
Au        11.90030       -1.15730       -2.67330
Au        17.95230        1.38910        3.06030
Au        16.05590       -3.72510       -1.95820
Au        13.17340       -0.78670        0.71930
Au        12.63540       -3.53050        1.63630
Au        15.51550        2.38290        4.01880
Au        12.96120        1.37520        3.11270
Au        15.22310        0.47750       -4.36390
Au        12.47230        3.54180       -1.47010
Au        16.67610        0.93330       -0.43240
Au        18.53580       -0.70280        1.26310
Au        10.71950        0.23480        1.72330
Au        15.05010        2.74400       -2.52650
Au        19.18910       -0.00090       -1.44080
Au        17.46330       -3.33080        1.84530
Au        11.50040        2.86570        1.10280
Au        17.54930        1.49870       -3.14420
Au        14.91460        4.62010       -0.33190
Au        14.70610       -0.35780        4.70420
Au        14.07750        1.89290        0.21490
Au        18.37840       -2.63610       -0.83610
C          8.22010       -3.53890       -1.83310
C          7.52150       -3.19680       -2.99890
C          7.32910       -4.13880       -4.01630
C          8.73560       -4.85110       -1.69370
C          8.56630       -5.77940       -2.71380
C          7.85960       -5.43140       -3.87160
O          9.48030       -5.20120       -0.58920
H          8.70690       -2.51540        1.40710
H          7.12030       -2.19000       -3.12850
H          8.98100       -6.78080       -2.59130
H          7.73030       -6.17760       -4.65360
C          9.06290       -4.57370        0.63810
C          8.86980       -3.08920        0.49060
C          8.40530       -2.61540       -0.73080
H          8.03420       -1.59380       -0.82570
H          9.84600       -4.81180        1.36830
H          8.11160       -5.02980        0.98210
O          6.61570       -3.70160       -5.10190
C          6.37270       -4.64280       -6.15050
H          5.79390       -4.09970       -6.90630
H          7.31570       -4.99650       -6.59740
H          5.78620       -5.50340       -5.79170
59
IM5-OMe    -197.47383  eV  ; -198.62646 eV  
Au        19.06460        2.51710        0.57980
Au        12.34750       -1.10230        3.19910
Au        12.85830        1.81030       -3.66660
Au        13.57470       -2.75730       -1.34120
Au        14.51520        0.25550       -1.86950
Au        13.83670        4.31310        2.08770
Au        17.23000       -0.84040        3.70460
Au        14.92250       -2.30270        2.80770
Au        16.61070        3.83030        1.50790
Au        17.26890       -0.83000       -2.92680
Au        15.26760       -4.07000        0.56990
Au        15.95390       -1.35170       -0.02780
Au        17.43830        4.03990       -1.21340
Au        14.74920       -1.84540       -3.84350
Au        15.49000        0.60740        1.91020
Au        11.52990        1.21160       -1.17330
Au        10.83450       -1.65440       -0.50300
Au        12.19090       -0.89080       -2.98380
Au        17.90570        1.80290        3.05020
Au        16.33230       -3.39220       -2.02520
Au        13.21580       -0.50110        0.51850
Au        12.63600       -3.23200        1.36030
Au        15.37860        2.71570        3.87290
Au        12.83800        1.73130        2.97970
Au        15.45180        0.87510       -4.48370
Au        12.56170        3.88110       -1.70610
Au        16.72650        1.32970       -0.53190
Au        18.78110       -0.30130        1.32310
Au        10.70970        0.49890        1.52510
Au        15.16220        3.23160       -2.73930
Au        19.33470        0.46060       -1.39240
Au        17.57320       -2.88570        1.76000
Au        11.52070        3.18410        0.89100
Au        17.70430        1.98900       -3.14770
Au        14.86380        5.03260       -0.47550
Au        14.60570        0.01660        4.53360
Au        14.13310        2.26420        0.09820
Au        18.63210       -2.23820       -0.80310
C          7.09550       -3.02460       -2.40290
C          6.11360       -2.57180       -3.29480
C          5.05100       -3.39720       -3.68850
C          6.99850       -4.34450       -1.89840
C          5.95760       -5.17250       -2.31230
C          4.97750       -4.70770       -3.20200
O          7.87730       -4.85330       -0.98160
H          6.16720       -1.55570       -3.69310
H          5.91520       -6.19020       -1.92550
H          4.17790       -5.38280       -3.50320
C          9.06360       -4.08010       -0.60230
C          9.15530       -2.68010       -1.11920
C          8.21810       -2.19860       -1.96680
H          8.27950       -1.18030       -2.35870
H          9.94060       -4.66140       -0.93320
H          9.07280       -4.07980        0.49790
O          4.13390       -2.82440       -4.55500
C          2.97010       -3.58940       -4.84540
H          2.34090       -2.96130       -5.48870
H          3.21370       -4.51910       -5.38640
H          2.41270       -3.84450       -3.92830
81
IM6-OMe    -308.03140  eV  ; -309.53419 eV
Au        18.76660        3.04120        1.20050
Au        12.76130       -1.86970        2.81710
Au        13.11040        1.29980       -3.57510
Au        14.46160       -3.28530       -1.24230
Au        15.04160        0.25410       -1.75250
Au        13.20070        3.67550        2.30780
Au        17.24070       -0.79040        4.04410
Au        15.44720       -2.82200        3.10580
Au        16.04840        3.83110        2.00990
Au        18.06590       -0.55370       -2.83040
Au        16.29500       -4.26810        0.71110
Au        16.21760       -1.45150        0.15720
Au        16.92340        4.09140       -0.68390
Au        15.59050       -1.85900       -3.52180
Au        15.31120        0.22990        2.14170
Au        11.32390        0.61430       -1.40420
Au        11.64160       -3.02480       -0.56560
Au        12.87930       -1.38950       -2.65660
Au        17.53730        1.91270        3.48470
Au        17.35280       -3.21710       -1.79600
Au        13.32650       -0.88250        0.24370
Au        13.56970       -4.11760        1.43560
Au        14.83320        2.25970        4.14670
Au        12.58810        0.93770        2.85940
Au        15.92330        0.84330       -4.38190
Au        12.28120        3.32770       -1.69480
Au        16.85850        1.31220        0.06100
Au        18.99120        0.16390        1.82030
Au        10.71210       -0.55200        1.13050
Au        14.99230        3.14380       -2.50290
Au        19.55590        1.18480       -0.91840
Au        18.09170       -2.53790        2.01800
Au        11.21950        2.34360        0.75440
Au        17.66090        2.22950       -2.65930
Au        14.21960        4.75470       -0.12740
Au        14.43750       -0.56730        4.68680
Au        14.08440        1.94540        0.22810
Au        19.11500       -1.54440       -0.38980
C          8.62550       -5.48670       -2.57660
C          7.73300       -5.39600       -3.65240
C          7.03500       -6.52190       -4.11040
C          8.81610       -6.74780       -1.96070
C          8.11710       -7.86380       -2.40990
C          7.22090       -7.75930       -3.48600
O          9.62800       -6.87980       -0.86160
H          7.57270       -4.43990       -4.15360
H          8.27720       -8.81880       -1.90780
H          6.68520       -8.64660       -3.82040
C         10.72870       -5.92900       -0.76700
C         10.38220       -4.52360       -1.17550
C          9.36840       -4.34550       -2.05470
H          9.10170       -3.35480       -2.42750
H         11.57210       -6.29390       -1.38690
H         11.04350       -5.97670        0.28240
C          8.99510       -1.28860        2.34410
C          8.47910       -0.67600        1.38460
H          9.10590       -1.86520        3.24680
C          7.51250       -0.11460        0.43950
H          7.57890        0.98820        0.46270
O          6.19940       -0.56670        0.81550
H          7.76550       -0.44710       -0.58150
C          5.16740       -0.23340       -0.03580
C          5.28770        0.59020       -1.16510
C          3.91620       -0.77090        0.28730
C          2.79040       -0.48350       -0.48720
C          2.90860        0.35160       -1.60800
C          4.16260        0.87670       -1.93970
H          4.24770        1.51780       -2.81810
H          1.83340       -0.92560       -0.21060
H          3.84330       -1.42660        1.15640
H          6.24490        1.02150       -1.45400
O          6.18830       -6.30790       -5.18210
O          1.86530        0.70330       -2.43720
C          0.57840        0.18550       -2.11220
H         -0.11130        0.62170       -2.84320
H          0.54550       -0.91510       -2.18990
H          0.26420        0.48620       -1.09790
C          5.44580       -7.42510       -5.65330
H          4.85240       -7.05630       -6.49920
H          6.10390       -8.24010       -5.99900
H          4.76640       -7.82040       -4.87850
81
IM7-OMe    -307.98111  eV  ; -309.47477 eV
Au        18.71580        3.09980        1.28030
Au        12.73450       -2.11950        2.70500
Au        13.34980        1.26890       -3.68200
Au        14.72740       -3.28060       -1.36960
Au        15.15570        0.17060       -1.78480
Au        13.07950        3.60760        2.14880
Au        17.19820       -0.73950        3.96620
Au        15.51020       -2.80070        2.89450
Au        15.93380        3.81920        1.93760
Au        18.25920       -0.41360       -2.77840
Au        16.52670       -4.28880        0.61880
Au        16.41670       -1.43570        0.12150
Au        16.98130        4.20380       -0.68040
Au        15.87010       -1.82460       -3.62880
Au        15.34850        0.26290        1.99850
Au        11.64830        0.52950       -1.49140
Au        11.86120       -3.17580       -0.81580
Au        13.10630       -1.46870       -2.82860
Au        17.39860        1.99130        3.51720
Au        17.61730       -3.12880       -1.84290
Au        13.44750       -1.04350        0.18110
Au        13.75400       -4.22160        1.21540
Au        14.63670        2.19460        4.00390
Au        12.54000        0.75020        2.47250
Au        16.14970        0.94300       -4.33500
Au        12.35770        3.30410       -1.86470
Au        16.88390        1.40320       -0.03740
Au        18.98140        0.27540        1.88710
Au        10.71800       -0.88520        0.92550
Au        15.13520        3.16560       -2.53980
Au        19.68090        1.31480       -0.76810
Au        18.23270       -2.49290        2.01130
Au        11.09840        2.33640        0.54010
Au        17.85720        2.37630       -2.62070
Au        14.20530        4.72920       -0.24080
Au        14.35800       -0.63210        4.45580
Au        14.02840        1.89010        0.08560
Au        19.31170       -1.44430       -0.35150
C          8.75400       -5.58820       -2.77270
C          7.82780       -5.48440       -3.81850
C          7.07470       -6.59130       -4.23890
C          8.92350       -6.84670       -2.14340
C          8.18020       -7.94610       -2.56370
C          7.24960       -7.82910       -3.61140
O          9.75200       -6.99450       -1.06350
H          7.67920       -4.52730       -4.32330
H          8.33750       -8.90470       -2.06720
H          6.69010       -8.70960       -3.92530
C         10.86200       -6.04800       -0.94760
C         10.56240       -4.65360       -1.41700
C          9.55010       -4.46410       -2.29560
H          9.32380       -3.47200       -2.69420
H         11.72730       -6.44940       -1.51090
H         11.12030       -6.07040        0.11910
C          8.33340       -2.67020        1.45010
C          8.73980       -1.49270        0.95660
H          8.98290       -3.41590        1.90610
C          7.68560       -0.66910        0.28330
H          7.04480       -0.17430        1.03740
O          6.78880       -1.47730       -0.57470
H          8.07420        0.09430       -0.39720
C          6.49460       -2.70440       -0.13330
C          5.95340       -3.63520       -1.00790
C          6.83350       -3.04970        1.27610
C          6.50420       -4.44840        1.65400
C          5.96830       -5.34120        0.75950
C          5.67370       -4.93360       -0.57490
H          5.26020       -5.64150       -1.28960
H          6.73180       -4.77450        2.66960
H          6.27830       -2.34610        1.94290
H          5.78270       -3.35210       -2.04670
O          6.18840       -6.35730       -5.27620
O          5.72220       -6.61490        1.21990
C          5.43160       -7.62570        0.24830
H          4.43650       -7.48020       -0.20710
H          6.19960       -7.66220       -0.54030
H          5.43480       -8.57210        0.80150
C          5.47360       -7.48210       -5.77340
H          4.85740       -7.10960       -6.60110
H          6.15830       -8.26080       -6.15120
H          4.81710       -7.92470       -5.00350
80
IM8-OMe    -308.06305  eV  ; -312.02963 eV
Au        18.91940        2.69930        0.73950
Au        12.41950       -1.23190        3.12460
Au        12.91230        1.75570       -3.83730
Au        13.67570       -2.70410       -1.46380
Au        14.51490        0.29520       -1.94190
Au        13.69330        4.22750        2.00550
Au        17.10780       -0.80490        3.72690
Au        14.95710       -2.60440        3.09550
Au        16.53540        4.08800        1.68710
Au        17.51830       -0.75690       -3.11760
Au        15.39590       -4.11790        0.49160
Au        15.74070       -1.34690        0.02410
Au        17.22910        4.03440       -1.06220
Au        14.91790       -1.74040       -3.89280
Au        15.39930        0.66830        1.89850
Au        11.36260        1.11350       -1.46420
Au        10.96630       -1.88710       -0.71520
Au        12.25550       -0.92040       -3.20240
Au        17.70360        1.89760        3.15650
Au        16.45210       -3.25790       -2.07690
Au        13.02050       -0.33110        0.43700
Au        12.87540       -3.18450        1.25000
Au        15.15260        2.78100        3.90950
Au        12.75750        1.57870        2.75170
Au        15.60650        0.92170       -4.57350
Au        12.46660        3.79680       -1.85080
Au        16.74120        1.24370       -0.50190
Au        18.65430       -0.12410        1.40960
Au        10.43330        0.27840        1.34310
Au        15.11750        3.20400       -2.73660
Au        19.41510        0.67620       -1.29670
Au        17.52740       -2.78350        1.78170
Au        11.48930        2.97360        0.65500
Au        17.69930        2.08290       -3.07160
Au        14.69890        5.14410       -0.47810
Au        14.52320        0.00830        4.48970
Au        14.19160        2.32110       -0.04720
Au        18.51570       -1.94890       -0.72980
C          8.09900       -4.31000       -3.01840
C          7.41520       -4.26270       -4.23950
C          6.77440       -5.39650       -4.75780
C          8.13250       -5.53940       -2.31390
C          7.48490       -6.66250       -2.82210
C          6.79980       -6.60100       -4.04830
O          8.73860       -5.62710       -1.08830
H          7.38050       -3.33090       -4.80850
H          7.52200       -7.59400       -2.25470
H          6.31360       -7.49790       -4.43060
C          9.85710       -4.71080       -0.86050
C          9.67710       -3.33220       -1.42500
C          8.80740       -3.16750       -2.45050
H          8.66600       -2.19260       -2.92310
H         10.77850       -5.16420       -1.27880
H          9.96720       -4.68710        0.23100
C          7.71800       -0.22180        2.63710
C          8.41880        0.48440        1.71790
H          8.21390       -0.92360        3.31240
C          7.65610        1.37940        0.78340
H          8.20390        2.30580        0.57390
O          6.36190        1.84170        1.28640
H          7.49650        0.85640       -0.18010
C          5.62630        0.91970        1.98260
C          6.26460       -0.12060        2.70680
C          4.24300        1.06770        2.03330
C          3.45370        0.18020        2.78610
C          4.07220       -0.86100        3.48660
C          5.46670       -1.00150        3.44790
H          5.93190       -1.81540        4.00830
H          2.37260        0.31750        2.80390
H          3.77980        1.88400        1.47590
O          6.14990       -5.22180       -5.98630
O          3.39370       -1.80210        4.25000
C          1.97610       -1.73640        4.23170
H          1.57360       -1.84800        3.20910
H          1.62690       -2.57270        4.85140
H          1.60530       -0.78900        4.66310
C          5.54620       -6.36820       -6.56260
H          5.13940       -6.04270       -7.52820
H          6.27840       -7.17770       -6.73240
H          4.72090       -6.75660       -5.93880
60
TS1/2-OMe  -194.82079  eV  ; -195.20580 eV
Au        19.03460        2.11580        0.69390
Au        12.27780       -1.43240        3.35810
Au        12.77400        1.43770       -3.51080
Au        13.43880       -3.14390       -1.20280
Au        14.44780       -0.11520       -1.73160
Au        13.81460        3.93900        2.21870
Au        17.15780       -1.23200        3.84120
Au        14.82980       -2.69200        2.97170
Au        16.57510        3.43450        1.62840
Au        17.16710       -1.24300       -2.79800
Au        15.13410       -4.44490        0.72440
Au        15.87010       -1.73680        0.11490
Au        17.40940        3.62660       -1.08310
Au        14.61780       -2.22310       -3.68970
Au        15.42260        0.22940        2.06020
Au        11.41030        0.85440       -1.03040
Au        10.83350       -2.03540       -0.25370
Au        12.07110       -1.23560       -2.82670
Au        17.86460        1.39990        3.15950
Au        16.18240       -3.78020       -1.87450
Au        13.17580       -0.83690        0.68560
Au        12.51560       -3.57860        1.50800
Au        15.35180        2.33520        4.00650
Au        12.78670        1.39300        3.14720
Au        15.35580        0.47850       -4.34960
Au        12.50910        3.51030       -1.55770
Au        16.67340        0.94040       -0.38480
Au        18.67870       -0.70550        1.43820
Au        10.65130        0.18250        1.69680
Au        15.10450        2.83420       -2.59440
Au        19.24890        0.03140       -1.27780
Au        17.46820       -3.28770        1.90050
Au        11.47960        2.83780        1.03110
Au        17.63120        1.56420       -3.02840
Au        14.83420        4.65240       -0.34960
Au        14.55460       -0.34840        4.68640
Au        14.08020        1.89720        0.23100
Au        18.51150       -2.66460       -0.67030
C          6.26690       -3.24030       -1.39580
C          5.32310       -2.81330       -2.35640
C          4.90500       -3.66660       -3.37430
C          6.77290       -4.56800       -1.47220
C          6.33990       -5.41880       -2.50150
C          5.40930       -4.98390       -3.43630
O          7.68050       -5.06630       -0.59570
H          6.31920       -2.68790       -0.45720
H          4.88440       -1.81530       -2.29610
H          6.74790       -6.42770       -2.54890
H          5.06650       -5.67150       -4.20670
C          8.48570       -4.13550        0.17250
C          8.95180       -2.97100       -0.64510
C          8.28320       -2.36030       -1.54800
H          8.22200       -1.59360       -2.30470
H          9.31510       -4.74120        0.55100
H          7.90260       -3.75390        1.02950
O          3.99220       -3.15690       -4.26460
C          3.08740       -4.08340       -4.88030
H          2.33580       -3.46770       -5.38880
H          3.58650       -4.72290       -5.62630
H          2.59510       -4.71210       -4.12040
60
TS2/3-OMe  -194.48514  eV  ; -194.95941 eV
Au        19.10690        1.96250        0.42100
Au        12.42030       -1.31660        3.54620
Au        12.54970        1.51510       -3.30220
Au        13.15000       -3.04280       -1.04450
Au        14.27450       -0.14450       -1.67130
Au        14.11490        3.92800        2.32960
Au        17.26960       -1.27750        3.65450
Au        14.87610       -2.69310        3.02240
Au        16.81440        3.38680        1.55830
Au        16.86500       -1.31150       -2.95440
Au        14.94240       -4.44840        0.71310
Au        15.72190       -1.75080        0.14270
Au        17.39200        3.53410       -1.23920
Au        14.17240       -2.18650       -3.66430
Au        15.48940        0.30560        2.04210
Au        11.30770        1.04990       -0.76530
Au        10.61160       -1.78420        0.09030
Au        11.73690       -1.11120       -2.55520
Au        18.10890        1.30920        2.97900
Au        15.80660       -3.76260       -1.93890
Au        13.10240       -0.75170        0.81260
Au        12.46270       -3.48690        1.74550
Au        15.70940        2.33180        4.05700
Au        12.99260        1.51070        3.37080
Au        15.01700        0.48130       -4.33090
Au        12.49840        3.64180       -1.37060
Au        16.62560        0.86410       -0.48930
Au        18.65050       -0.83850        1.18290
Au        10.75050        0.37380        1.98350
Au        14.98030        2.85520       -2.59950
Au        19.12190       -0.09380       -1.54590
Au        17.38580       -3.39660        1.74320
Au        11.64830        2.99540        1.31510
Au        17.41570        1.48160       -3.18630
Au        14.94890        4.64720       -0.28440
Au        14.79670       -0.30940        4.71530
Au        14.11180        1.93520        0.24880
Au        18.24590       -2.75050       -0.91120
C          6.86270       -3.17980       -1.80650
C          5.89110       -2.76770       -2.76970
C          5.20410       -3.70440       -3.53390
C          7.13860       -4.58760       -1.66420
C          6.47320       -5.50100       -2.47960
C          5.50460       -5.07930       -3.39270
O          8.10830       -5.03430       -0.83540
H          6.67040       -2.56270       -0.72980
H          5.67590       -1.70510       -2.90130
H          6.71240       -6.56080       -2.37870
H          4.98580       -5.82570       -3.99060
C          8.54630       -4.10140        0.20540
C          8.86000       -2.73740       -0.34490
C          7.93570       -2.23940       -1.22700
H          7.92900       -1.21970       -1.61080
H          9.41110       -4.58990        0.66380
H          7.73840       -4.02900        0.96050
O          4.26510       -3.20530       -4.39780
C          3.43540       -4.13200       -5.10870
H          2.76790       -3.51550       -5.72200
H          4.02550       -4.78770       -5.76980
H          2.82860       -4.74650       -4.42000
60
TS3/4-OMe  -195.25946  eV  ; -195.72082 eV 
Au        19.15620        2.28450        0.19490
Au        12.41680       -0.85210        3.36880
Au        12.55560        1.83100       -3.47110
Au        13.06680       -2.66490       -1.14060
Au        14.28580        0.16830       -1.84900
Au        14.20920        4.32670        2.06390
Au        17.25960       -0.89020        3.46510
Au        14.84820       -2.32070        2.92040
Au        16.89850        3.77430        1.31120
Au        16.83840       -1.03980       -3.17700
Au        14.88530       -4.06910        0.60670
Au        15.69260       -1.39050        0.02700
Au        17.44710        3.82220       -1.48450
Au        14.06430       -1.86140       -3.81030
Au        15.49400        0.72550        1.84240
Au        11.26460        1.47840       -0.93300
Au        10.53550       -1.36120        0.01190
Au        11.67640       -0.72860       -2.65160
Au        18.13670        1.67340        2.75090
Au        15.69970       -3.39190       -2.06070
Au        13.06580       -0.32290        0.64000
Au        12.42110       -3.06790        1.63680
Au        15.77390        2.75300        3.83740
Au        13.04950        1.96150        3.15080
Au        15.00610        0.76630       -4.52810
Au        12.54550        4.01930       -1.62080
Au        16.65320        1.17930       -0.70170
Au        18.62000       -0.50270        0.97760
Au        10.74180        0.87340        1.83870
Au        15.02090        3.14380       -2.81910
Au        19.12190        0.17800       -1.75970
Au        17.35320       -3.05030        1.61240
Au        11.71280        3.45090        1.09140
Au        17.43670        1.74150       -3.41710
Au        15.02130        5.00500       -0.55950
Au        14.81410        0.11620        4.51700
Au        14.14390        2.31100       -0.00550
Au        18.16910       -2.44200       -1.07870
C          7.07100       -2.94320       -2.20570
C          6.13360       -2.57400       -3.18450
C          5.54700       -3.54240       -4.00420
C          7.38810       -4.30810       -2.01600
C          6.82350       -5.27110       -2.85270
C          5.90970       -4.89120       -3.84010
O          8.31640       -4.70740       -1.09310
H          7.65860       -1.64480       -0.29050
H          5.87680       -1.52390       -3.33700
H          7.11200       -6.31680       -2.72990
H          5.49140       -5.66210       -4.48570
C          8.55010       -3.77690       -0.00340
C          8.80360       -2.36080       -0.47990
C          7.89500       -1.96310       -1.50850
H          8.01870       -0.97120       -1.95980
H          9.42610       -4.16920        0.52040
H          7.69300       -3.81970        0.69280
O          4.67210       -3.07530       -4.94890
C          4.08170       -4.03480       -5.82920
H          3.47250       -3.45110       -6.52590
H          4.84860       -4.59100       -6.39320
H          3.43820       -4.73990       -5.27890
81
TS6/7-OMe  -307.51596  eV  ; -309.01323 eV
Au        18.70890        3.11270        1.28690
Au        12.71980       -2.10720        2.69940
Au        13.32440        1.26800       -3.66860
Au        14.71700       -3.28270       -1.36590
Au        15.13950        0.17710       -1.77870
Au        13.05390        3.61110        2.14290
Au        17.18620       -0.73570        3.97930
Au        15.49480       -2.79800        2.91240
Au        15.91900        3.82510        1.94660
Au        18.24290       -0.41700       -2.77420
Au        16.50630       -4.28900        0.63000
Au        16.40200       -1.43210        0.13180
Au        16.96320        4.20100       -0.67490
Au        15.85480       -1.82430       -3.62090
Au        15.33260        0.26560        2.00950
Au        11.60850        0.53200       -1.49850
Au        11.85220       -3.17650       -0.81210
Au        13.08850       -1.46000       -2.82240
Au        17.38660        1.99350        3.51780
Au        17.60500       -3.13070       -1.83650
Au        13.45620       -1.05090        0.17880
Au        13.74150       -4.23040        1.23400
Au        14.62200        2.19900        4.00320
Au        12.52890        0.76460        2.50000
Au        16.13720        0.94110       -4.32810
Au        12.33780        3.30940       -1.86350
Au        16.87330        1.40460       -0.02680
Au        18.96150        0.27590        1.89130
Au        10.72450       -0.79560        0.88210
Au        15.12020        3.15740       -2.53360
Au        19.66750        1.31470       -0.76810
Au        18.21000       -2.49720        2.02370
Au        11.06260        2.31460        0.55030
Au        17.84850        2.37590       -2.61330
Au        14.19680        4.72990       -0.23690
Au        14.34140       -0.62900        4.47190
Au        14.02140        1.89940        0.09280
Au        19.28420       -1.43810       -0.33870
C          8.73960       -5.58630       -2.76490
C          7.81520       -5.48400       -3.81250
C          7.05620       -6.58890       -4.22760
C          8.90750       -6.84430       -2.13390
C          8.15550       -7.94130       -2.54490
C          7.22360       -7.82410       -3.59220
O          9.73910       -6.98930       -1.05530
H          7.67000       -4.52840       -4.32110
H          8.30860       -8.89870       -2.04410
H          6.65840       -8.70290       -3.90070
C         10.85690       -6.05020       -0.96220
C         10.54850       -4.65000       -1.40980
C          9.53070       -4.46070       -2.28290
H          9.29290       -3.46780       -2.67200
H         11.70420       -6.44810       -1.55470
H         11.14760       -6.08500        0.09520
C          8.55380       -2.57520        1.40220
C          8.67680       -1.39230        0.90710
H          9.07730       -3.43190        1.79920
C          7.55760       -0.60010        0.31350
H          6.99830       -0.09870        1.12330
O          6.64260       -1.42430       -0.46880
H          7.90390        0.16180       -0.39190
C          6.35130       -2.67300       -0.02110
C          5.97920       -3.63370       -0.96740
C          6.48380       -3.04670        1.35120
C          6.21620       -4.39060        1.72230
C          5.85730       -5.33650        0.77020
C          5.70950       -4.94600       -0.58140
H          5.39750       -5.66440       -1.33820
H          6.33060       -4.69940        2.76460
H          6.40790       -2.27870        2.12230
H          5.90780       -3.34280       -2.01650
O          6.17560       -6.35360       -5.26900
O          5.62290       -6.60830        1.22840
C          5.39340       -7.62670        0.24930
H          4.43770       -7.47300       -0.28100
H          6.21970       -7.66740       -0.47680
H          5.34460       -8.56540        0.81230
C          5.44950       -7.47310       -5.76080
H          4.83830       -7.09640       -6.59000
H          6.12490       -8.26110       -6.13530
H          4.78720       -7.90430       -4.98950
80
TS8-OMe    -306.50336  eV  ; -310.52597 eV
Au        18.86510        2.75550        0.75580
Au        12.30090       -1.33890        3.00210
Au        12.95610        1.67040       -3.91820
Au        13.75060       -2.72430       -1.53640
Au        14.56760        0.23080       -2.02860
Au        13.47440        4.11540        1.87280
Au        16.98780       -0.81080        3.73300
Au        14.87600       -2.64400        3.02990
Au        16.37170        4.09200        1.65870
Au        17.62130       -0.78550       -3.15630
Au        15.42800       -4.10660        0.47060
Au        15.83730       -1.35260       -0.01730
Au        17.15910        4.03890       -1.07150
Au        15.01450       -1.80580       -3.96250
Au        15.35980        0.65880        1.85470
Au        11.30540        1.00500       -1.66730
Au        11.11990       -2.00580       -0.80820
Au        12.30570       -1.02640       -3.33110
Au        17.57200        1.94270        3.15320
Au        16.54450       -3.26830       -2.09200
Au        13.14820       -0.40200        0.36100
Au        12.84190       -3.28600        1.14070
Au        14.95680        2.73900        3.82180
Au        12.60150        1.44910        2.61540
Au        15.68380        0.86800       -4.61390
Au        12.42260        3.71700       -1.93930
Au        16.72470        1.26870       -0.51870
Au        18.53240       -0.08530        1.41500
Au        10.37140        0.11640        1.10810
Au        15.10780        3.13710       -2.78690
Au        19.42210        0.71110       -1.24490
Au        17.51310       -2.77860        1.81040
Au        11.33640        2.77810        0.50300
Au        17.71950        2.06080       -3.07250
Au        14.59770        5.08390       -0.55250
Au        14.36700       -0.04960        4.40060
Au        14.11990        2.25110       -0.14770
Au        18.59010       -1.94060       -0.72750
C          7.51470       -3.43940       -2.14900
C          7.07740       -3.63260       -3.47100
C          6.19390       -4.66300       -3.79360
C          7.07020       -4.34950       -1.14880
C          6.16450       -5.35230       -1.46730
C          5.70780       -5.51400       -2.79020
O          7.49760       -4.21310        0.14820
H          7.43520       -2.97010       -4.26250
H          5.82790       -6.02560       -0.67770
H          5.01440       -6.32100       -3.01310
C          8.85710       -3.67790        0.22770
C          9.04360       -2.39580       -0.54080
C          8.37640       -2.35790       -1.75620
H          8.51470       -1.52770       -2.45100
H          9.54170       -4.43850       -0.19430
H          9.07350       -3.58180        1.29650
C          7.75430       -1.25520        1.68380
C          8.44640       -0.71140        0.61040
H          8.25010       -1.93970        2.37720
C          7.58310        0.13520       -0.32570
H          8.16880        0.89870       -0.85060
O          6.54060        0.86740        0.36620
H          7.08380       -0.51130       -1.06760
C          5.76060        0.06450        1.15380
C          6.35280       -1.01070        1.87090
C          4.40100        0.33530        1.27730
C          3.58890       -0.45980        2.10250
C          4.16600       -1.50550        2.83930
C          5.53300       -1.76590        2.73320
H          5.95910       -2.59260        3.30430
H          2.51980       -0.25790        2.14690
H          3.97670        1.16100        0.70240
O          5.85800       -4.76480       -5.13660
O          3.45530       -2.33570        3.69600
C          2.04110       -2.32520        3.56770
H          1.72870       -2.51120        2.52430
H          1.67530       -3.14080        4.20510
H          1.59300       -1.37510        3.91180
C          5.02880       -5.85630       -5.50160
H          4.88320       -5.77450       -6.58570
H          5.50410       -6.82710       -5.27170
H          4.04700       -5.81210       -4.99690
22
Pr-OMe     -111.96159  eV  ; -112.21728 eV
C          8.11170       -3.57450       -1.79160
C          7.42110       -3.23670       -2.95860
C          7.27360       -4.16200       -4.00040
C          8.65760       -4.87380       -1.66960
C          8.52800       -5.78750       -2.70840
C          7.83190       -5.44010       -3.87460
O          9.40670       -5.23060       -0.56860
H          8.99090       -2.42920        1.32440
H          6.99330       -2.24030       -3.07720
H          8.97380       -6.77650       -2.60080
H          7.73620       -6.17460       -4.67240
C          9.05890       -4.56130        0.66210
C          8.81140       -3.09440        0.47900
C          8.33970       -2.64120       -0.69710
H          8.11970       -1.58390       -0.85470
H          9.90560       -4.74960        1.33420
H          8.16790       -5.05510        1.10360
O          6.57960       -3.71180       -5.10060
C          6.42760       -4.61970       -6.18880
H          5.88020       -4.06980       -6.96200
H          7.40340       -4.93770       -6.59110
H          5.84640       -5.50880       -5.89430
42
Prd-OMe    -219.25747 eV   ; -219.71299 eV
C          6.93850       -4.19270       -3.08920
C          7.27410       -3.93300       -4.42530
C          7.67330       -4.96570       -5.28070
C          7.01520       -5.52380       -2.61550
C          7.39350       -6.55470       -3.46740
C          7.72620       -6.28270       -4.80030
O          6.61460       -5.83190       -1.33780
H          7.21620       -2.91720       -4.81970
H          7.42230       -7.57500       -3.08390
H          8.03220       -7.10400       -5.44560
C          6.78100       -4.77660       -0.37040
C          6.29270       -3.42820       -0.85430
C          6.43370       -3.18020       -2.18920
H          6.14470       -2.22380       -2.62580
H          7.84860       -4.71120       -0.08430
H          6.21670       -5.12670        0.49930
C          5.61590       -2.72120        1.43240
C          5.77860       -2.46850        0.10100
H          5.86880       -3.68980        1.86420
C          5.33050       -1.10420       -0.37800
H          5.91450       -0.76550       -1.23970
O          5.51720       -0.06040        0.59920
H          4.26410       -1.13530       -0.67320
C          5.10530       -0.36490        1.87360
C          5.13070       -1.70220        2.33520
C          4.76050        0.67090        2.73460
C          4.41070        0.39690        4.06280
C          4.40970       -0.92660        4.52920
C          4.77670       -1.96450        3.66580
H          4.79330       -2.98670        4.04760
H          4.13460        1.22260        4.71650
H          4.77150        1.69620        2.36350
O          7.98290       -4.58940       -6.56720
O          4.07780       -1.30420        5.81000
C          3.73160       -0.26550        6.72320
H          2.84120        0.28960        6.38670
H          3.51030       -0.76370        7.67310
H          4.56710        0.43850        6.86720
C          8.36640       -5.62340       -7.47130
H          8.53550       -5.13000       -8.43390
H          9.29590       -6.11830       -7.14690
H          7.56900       -6.37600       -7.58380
